# Supplementary material
Source: publisher site journal article supplement (https://www.dovepress.com/article/417830)

**Supplementary Table 1** HWE, MAF, and comparison of the allele frequencies

| Gene     | SNP         | A1 | A2 | <i>P</i> for HWE | MAF   | <i>P</i> for allele frequencies |
|----------|-------------|----|----|------------------|-------|---------------------------------|
| SLC2A1   | rs841858    | T  | G  | 1                | 0.14  | 0.015                           |
| SLC2A1   | rs3754219   | C  | A  | 0.836            | 0.43  | 0.581                           |
| SLC2A1   | rs841853    | A  | C  | 0.211            | 0.20  | 0.814                           |
| SLC2A1   | rs841847    | T  | C  | 0.307            | 0.13  | 0.159                           |
| SLC2A1   | rs1385129   | A  | G  | 1                | <0.01 | -                               |
| SLC2A1   | rs7512565   | T  | C  | 0.773            | 0.20  | 0.122                           |
| SLC2A1   | rs2297977   | T  | G  | 0.087            | 0.19  | 0.016                           |
| SLC2A1   | rs12565724  | -  | -  | -                | -     | -                               |
| STAT1    | rs3771300   | G  | T  | 0.082            | 0.30  | 0.658                           |
| STAT1    | rs1914408   | T  | C  | 0.018            | 0.30  | 0.176                           |
| STAT1    | rs2066804   | A  | G  | 0.064            | 0.46  | 0.707                           |
| STAT1    | rs1547550   | C  | G  | 1                | 0.10  | 0.042                           |
| STAT1    | rs2280232   | C  | A  | 0.111            | 0.15  | 0.956                           |
| STAT1    | rs34997637  | G  | A  | 0.296            | 0.50  | 0.016                           |
| STAT1    | rs12693591  | A  | C  | 1                | 0.28  | 0.866                           |
| STAT1    | rs10173099  | C  | T  | 0.818            | 0.37  | 0.083                           |
| STAT1    | rs2066802   | G  | A  | 0.787            | 0.26  | 0.459                           |
| STAT1    | rs10208033  | T  | C  | 0.346            | 0.36  | 0.107                           |
| STAT1    | rs1467199   | G  | C  | 0.304            | 0.48  | 0.386                           |
| CTNNB1   | rs3864004   | A  | G  | 0.289            | 0.25  | 0.764                           |
| CTNNB1   | rs75288535  | G  | A  | 0.531            | 0.19  | 0.456                           |
| CTNNB1   | rs77156365  | A  | G  | 1                | <0.01 | -                               |
| CTNNB1   | rs1798802   | A  | G  | 0.342            | 0.31  | 0.875                           |
| CTNNB1   | rs11564465  | T  | C  | 0.344            | 0.22  | 0.408                           |
| CTNNB1   | rs4135385   | A  | G  | 0.681            | 0.49  | 0.197                           |
| CTNNB1   | rs2293303   | T  | C  | 0.591            | 0.12  | 0.528                           |
| SERPINE1 | rs2227631   | A  | G  | 0.295            | 0.40  | 0.778                           |
| SERPINE1 | rs1799889   | -  | G  | 1                | <0.01 | -                               |
| SERPINE1 | rs6092      | A  | G  | 0.451            | 0.09  | 0.657                           |
| SERPINE1 | rs6090      | A  | G  | 1                | 0.02  | 0.637                           |
| SERPINE1 | rs118134071 | T  | C  | 1                | <0.01 | -                               |
| SERPINE1 | rs2227667   | G  | A  | 0.148            | 0.44  | 0.833                           |
| SERPINE1 | rs2227692   | T  | C  | 0.013            | 0.35  | 0.967                           |
| SERPINE1 | rs7242      | G  | T  | 0.839            | 0.50  | 0.756                           |
| DKK1     | rs11001553  | T  | C  | 1                | 0.09  | 0.946                           |
| DKK1     | rs2241529   | G  | A  | 1                | 0.32  | 0.919                           |
| DKK1     | rs1569198   | G  | A  | 1                | 0.23  | 0.927                           |
| IFNG     | rs2069717   | -  | A  | 1                | <0.01 | -                               |
| IFNG     | rs1861494   | C  | T  | 0.284            | 0.38  | 0.331                           |
| IFNG     | rs2430561   | A  | T  | 1                | 0.13  | 0.690                           |
| IFNG     | rs2069709   | -  | C  | 1                | <0.01 | -                               |

|       |             |   |   |       |       |       |
|-------|-------------|---|---|-------|-------|-------|
| IFNG  | rs2069707   | - | G | 1     | <0.01 | -     |
| IFNG  | rs2069705   | A | G | 0.290 | 0.18  | 0.984 |
| HIF1A | rs2301104   | C | G | 1     | 0.05  | 0.829 |
| HIF1A | rs72714570  | G | C | 1     | 0.15  | 0.487 |
| HIF1A | rs1957757   | T | C | 0.005 | 0.02  | -     |
| HIF1A | rs41508050  | - | C | 1     | <0.01 | -     |
| HIF1A | rs116908431 | - | - | -     | -     | -     |
| HIF1A | rs2301113   | C | A | 0.522 | 0.38  | 0.905 |
| HIF1A | rs34005929  | - | G | 1     | <0.01 | -     |
| HIF1A | rs11549465  | T | C | 1     | 0.06  | 0.118 |
| HIF1A | rs2057482   | T | C | 1     | 0.21  | 0.281 |

**Supplementary Table 2** Comparison of the genotype distribution by three genetic models

| Gene   | SNP        | A1 | A2 | TEST      | AFF      | UNAFF    | <i>P</i> for genotypes |
|--------|------------|----|----|-----------|----------|----------|------------------------|
| SLC2A1 | rs841858   | T  | G  | Genotypic | 3/27/57  | 1/17/77  | NA                     |
| SLC2A1 | rs841858   | T  | G  | Dominant  | 30/57    | 18/77    | NA                     |
| SLC2A1 | rs841858   | T  | G  | Recessive | 3/84     | 1/94     | NA                     |
| SLC2A1 | rs3754219  | C  | A  | Genotypic | 13/46/27 | 18/49/28 | 0.789                  |
| SLC2A1 | rs3754219  | C  | A  | Dominant  | 59/27    | 67/28    | 0.779                  |
| SLC2A1 | rs3754219  | C  | A  | Recessive | 13/73    | 18/77    | 0.495                  |
| SLC2A1 | rs841853   | A  | C  | Genotypic | 4/26/57  | 6/27/62  | NA                     |
| SLC2A1 | rs841853   | A  | C  | Dominant  | 30/57    | 33/62    | NA                     |
| SLC2A1 | rs841853   | A  | C  | Recessive | 4/83     | 6/89     | NA                     |
| SLC2A1 | rs841847   | T  | C  | Genotypic | 4/20/63  | 2/17/76  | NA                     |
| SLC2A1 | rs841847   | T  | C  | Dominant  | 24/63    | 19/76    | NA                     |
| SLC2A1 | rs841847   | T  | C  | Recessive | 4/83     | 2/93     | NA                     |
| SLC2A1 | rs7512565  | T  | C  | Genotypic | 1/27/59  | 4/36/55  | NA                     |
| SLC2A1 | rs7512565  | T  | C  | Dominant  | 28/59    | 40/55    | NA                     |
| SLC2A1 | rs7512565  | T  | C  | Recessive | 1/86     | 4/91     | NA                     |
| SLC2A1 | rs2297977  | T  | G  | Genotypic | 6/30/51  | 4/19/72  | NA                     |
| SLC2A1 | rs2297977  | T  | G  | Dominant  | 36/51    | 23/72    | NA                     |
| SLC2A1 | rs2297977  | T  | G  | Recessive | 6/81     | 4/91     | NA                     |
| STAT1  | rs3771300  | G  | T  | Genotypic | 9/37/41  | 12/32/51 | 0.466                  |
| STAT1  | rs3771300  | G  | T  | Dominant  | 46/41    | 44/51    | 0.377                  |
| STAT1  | rs3771300  | G  | T  | Recessive | 9/78     | 12/83    | 0.630                  |
| STAT1  | rs1914408  | T  | C  | Genotypic | 9/41/37  | 12/28/55 | 0.048                  |
| STAT1  | rs1914408  | T  | C  | Dominant  | 50/37    | 40/55    | 0.038                  |
| STAT1  | rs1914408  | T  | C  | Recessive | 9/78     | 12/83    | 0.630                  |
| STAT1  | rs2066804  | A  | G  | Genotypic | 19/41/27 | 26/38/31 | 0.569                  |
| STAT1  | rs2066804  | A  | G  | Dominant  | 60/27    | 64/31    | 0.817                  |
| STAT1  | rs2066804  | A  | G  | Recessive | 19/68    | 26/69    | 0.388                  |
| STAT1  | rs1547550  | C  | G  | Genotypic | 2/19/66  | 0/13/82  | NA                     |
| STAT1  | rs1547550  | C  | G  | Dominant  | 21/66    | 13/82    | NA                     |
| STAT1  | rs1547550  | C  | G  | Recessive | 2/85     | 0/95     | NA                     |
| STAT1  | rs2280232  | C  | A  | Genotypic | 0/26/61  | 4/20/71  | NA                     |
| STAT1  | rs2280232  | C  | A  | Dominant  | 26/61    | 24/71    | NA                     |
| STAT1  | rs2280232  | C  | A  | Recessive | 0/87     | 4/91     | NA                     |
| STAT1  | rs34997637 | G  | A  | Genotypic | 29/40/18 | 21/41/33 | 0.068                  |
| STAT1  | rs34997637 | G  | A  | Dominant  | 69/18    | 62/33    | 0.035                  |
| STAT1  | rs34997637 | G  | A  | Recessive | 29/58    | 21/74    | 0.090                  |
| STAT1  | rs12693591 | A  | C  | Genotypic | 5/39/43  | 7/38/50  | 0.770                  |
| STAT1  | rs12693591 | A  | C  | Dominant  | 44/43    | 45/50    | 0.666                  |
| STAT1  | rs12693591 | A  | C  | Recessive | 5/82     | 7/88     | 0.660                  |
| STAT1  | rs10173099 | C  | T  | Genotypic | 17/39/31 | 11/41/43 | 0.230                  |
| STAT1  | rs10173099 | C  | T  | Dominant  | 56/31    | 52/43    | 0.186                  |
| STAT1  | rs10173099 | C  | T  | Recessive | 17/70    | 11/84    | 0.137                  |

|          |            |   |   |           |          |          |       |
|----------|------------|---|---|-----------|----------|----------|-------|
| STAT1    | rs2066802  | G | A | Genotypic | 7/35/45  | 5/37/53  | 0.708 |
| STAT1    | rs2066802  | G | A | Dominant  | 42/45    | 42/53    | 0.583 |
| STAT1    | rs2066802  | G | A | Recessive | 7/80     | 5/90     | 0.450 |
| STAT1    | rs10208033 | T | C | Genotypic | 13/44/30 | 12/37/46 | 0.160 |
| STAT1    | rs10208033 | T | C | Dominant  | 57/30    | 49/46    | 0.057 |
| STAT1    | rs10208033 | T | C | Recessive | 13/74    | 12/83    | 0.651 |
| STAT1    | rs1467199  | G | C | Genotypic | 19/42/26 | 27/42/26 | 0.594 |
| STAT1    | rs1467199  | G | C | Dominant  | 61/26    | 69/26    | 0.707 |
| STAT1    | rs1467199  | G | C | Recessive | 19/68    | 27/68    | 0.307 |
| CTNNB1   | rs3864004  | A | G | Genotypic | 6/30/50  | 4/41/50  | NA    |
| CTNNB1   | rs3864004  | A | G | Dominant  | 36/50    | 45/50    | NA    |
| CTNNB1   | rs3864004  | A | G | Recessive | 6/80     | 4/91     | NA    |
| CTNNB1   | rs75288535 | G | A | Genotypic | 7/16/63  | 5/29/61  | 0.159 |
| CTNNB1   | rs75288535 | G | A | Dominant  | 23/63    | 34/61    | 0.191 |
| CTNNB1   | rs75288535 | G | A | Recessive | 7/79     | 5/90     | 0.437 |
| CTNNB1   | rs1798802  | A | G | Genotypic | 9/35/42  | 7/46/42  | 0.522 |
| CTNNB1   | rs1798802  | A | G | Dominant  | 44/42    | 53/42    | 0.533 |
| CTNNB1   | rs1798802  | A | G | Recessive | 9/77     | 7/88     | 0.464 |
| CTNNB1   | rs11564465 | T | C | Genotypic | 6/30/51  | 2/35/58  | NA    |
| CTNNB1   | rs11564465 | T | C | Dominant  | 36/51    | 37/58    | NA    |
| CTNNB1   | rs11564465 | T | C | Recessive | 6/81     | 2/93     | NA    |
| CTNNB1   | rs4135385  | A | G | Genotypic | 18/41/26 | 27/45/23 | 0.445 |
| CTNNB1   | rs4135385  | A | G | Dominant  | 59/26    | 72/23    | 0.337 |
| CTNNB1   | rs4135385  | A | G | Recessive | 18/67    | 27/68    | 0.263 |
| CTNNB1   | rs2293303  | T | C | Genotypic | 3/16/68  | 0/20/75  | NA    |
| CTNNB1   | rs2293303  | T | C | Dominant  | 19/68    | 20/75    | NA    |
| CTNNB1   | rs2293303  | T | C | Recessive | 3/84     | 0/95     | NA    |
| SERPINE1 | rs2227631  | A | G | Genotypic | 16/36/35 | 18/41/36 | 0.949 |
| SERPINE1 | rs2227631  | A | G | Dominant  | 52/35    | 59/36    | 0.747 |
| SERPINE1 | rs2227631  | A | G | Recessive | 16/71    | 18/77    | 0.923 |
| SERPINE1 | rs6092     | A | G | Genotypic | 1/14/72  | 1/13/81  | NA    |
| SERPINE1 | rs6092     | A | G | Dominant  | 15/72    | 14/81    | NA    |
| SERPINE1 | rs6092     | A | G | Recessive | 1/86     | 1/94     | NA    |
| SERPINE1 | rs6090     | A | G | Genotypic | 0/5/82   | 0/4/91   | NA    |
| SERPINE1 | rs6090     | A | G | Dominant  | 5/82     | 4/91     | NA    |
| SERPINE1 | rs6090     | A | G | Recessive | 0/87     | 0/95     | NA    |
| SERPINE1 | rs2227667  | G | A | Genotypic | 19/39/29 | 14/54/27 | 0.234 |
| SERPINE1 | rs2227667  | G | A | Dominant  | 58/29    | 68/27    | 0.473 |
| SERPINE1 | rs2227667  | G | A | Recessive | 19/68    | 14/81    | 0.214 |
| SERPINE1 | rs2227692  | T | C | Genotypic | 11/39/37 | 6/55/34  | 0.137 |
| SERPINE1 | rs2227692  | T | C | Dominant  | 50/37    | 61/34    | 0.352 |
| SERPINE1 | rs2227692  | T | C | Recessive | 11/76    | 6/89     | 0.143 |
| SERPINE1 | rs7242     | G | T | Genotypic | 23/42/22 | 22/49/24 | 0.862 |
| SERPINE1 | rs7242     | G | T | Dominant  | 65/22    | 71/24    | 0.997 |

|          |            |   |   |           |          |          |       |
|----------|------------|---|---|-----------|----------|----------|-------|
| SERPINE1 | rs7242     | G | T | Recessive | 23/64    | 22/73    | 0.609 |
| DKK1     | rs11001553 | T | C | Genotypic | 0/15/72  | 0/16/79  | NA    |
| DKK1     | rs11001553 | T | C | Dominant  | 15/72    | 16/79    | NA    |
| DKK1     | rs11001553 | T | C | Recessive | 0/87     | 0/95     | NA    |
| DKK1     | rs2241529  | G | A | Genotypic | 8/39/40  | 10/41/44 | 0.946 |
| DKK1     | rs2241529  | G | A | Dominant  | 47/40    | 51/44    | 0.964 |
| DKK1     | rs2241529  | G | A | Recessive | 8/79     | 10/85    | 0.764 |
| DKK1     | rs1569198  | G | A | Genotypic | 4/33/50  | 5/34/56  | NA    |
| DKK1     | rs1569198  | G | A | Dominant  | 37/50    | 39/56    | NA    |
| DKK1     | rs1569198  | G | A | Recessive | 4/83     | 5/90     | NA    |
| IFNG     | rs1861494  | C | T | Genotypic | 10/41/36 | 18/40/37 | 0.375 |
| IFNG     | rs1861494  | C | T | Dominant  | 51/36    | 58/37    | 0.738 |
| IFNG     | rs1861494  | C | T | Recessive | 10/77    | 18/77    | 0.164 |
| IFNG     | rs2430561  | A | T | Genotypic | 0/20/65  | 1/23/71  | NA    |
| IFNG     | rs2430561  | A | T | Dominant  | 20/65    | 24/71    | NA    |
| IFNG     | rs2430561  | A | T | Recessive | 0/85     | 1/94     | NA    |
| IFNG     | rs2069705  | A | G | Genotypic | 3/25/59  | 1/32/62  | NA    |
| IFNG     | rs2069705  | A | G | Dominant  | 28/59    | 33/62    | NA    |
| IFNG     | rs2069705  | A | G | Recessive | 3/84     | 1/94     | NA    |
| HIF1A    | rs2301104  | C | G | Genotypic | 0/9/77   | 0/9/86   | NA    |
| HIF1A    | rs2301104  | C | G | Dominant  | 9/77     | 9/86     | NA    |
| HIF1A    | rs2301104  | C | G | Recessive | 0/86     | 0/95     | NA    |
| HIF1A    | rs72714570 | G | C | Genotypic | 1/21/65  | 2/26/67  | NA    |
| HIF1A    | rs72714570 | G | C | Dominant  | 22/65    | 28/67    | NA    |
| HIF1A    | rs72714570 | G | C | Recessive | 1/86     | 2/93     | NA    |
| HIF1A    | rs2301113  | C | A | Genotypic | 13/41/33 | 15/42/38 | 0.925 |
| HIF1A    | rs2301113  | C | A | Dominant  | 54/33    | 57/38    | 0.775 |
| HIF1A    | rs2301113  | C | A | Recessive | 13/74    | 15/80    | 0.874 |
| HIF1A    | rs11549465 | T | C | Genotypic | 0/14/72  | 0/8/87   | NA    |
| HIF1A    | rs11549465 | T | C | Dominant  | 14/72    | 8/87     | NA    |
| HIF1A    | rs11549465 | T | C | Recessive | 0/86     | 0/95     | NA    |
| HIF1A    | rs2057482  | T | C | Genotypic | 3/35/49  | 3/30/62  | NA    |
| HIF1A    | rs2057482  | T | C | Dominant  | 38/49    | 33/62    | NA    |
| HIF1A    | rs2057482  | T | C | Recessive | 3/84     | 3/92     | NA    |

**Supplementary Table 3A** The association between each SNP and capsule formation stratified by age

≤ 60 years

> 60 years

| SNP (genotype)                | OR            | 95%CI      | P value | SNP (genotype)                | OR            | 95%CI      | P value |
|-------------------------------|---------------|------------|---------|-------------------------------|---------------|------------|---------|
| SLC2A1 rs841858 (GT vs. GG)   | 3.23          | 1.03-10.08 | 0.044   | SLC2A1 rs841858 (GT vs. GG)   | 1.70          | 0.68-4.26  | 0.257   |
| SLC2A1 rs841858 (TT vs. GG)   | 2.69          | 0.23-30.95 | 0.428   | SLC2A1 rs841858 (TT vs. GG)   | 2197045786.28 | NA         | 1.000   |
| SLC2A1 rs3754219 (CA vs. AA)  | 0.76          | 0.29-1.98  | 0.577   | SLC2A1 rs3754219 (CA vs. AA)  | 1.21          | 0.47-3.14  | 0.689   |
| SLC2A1 rs3754219 (CC vs. AA)  | 0.64          | 0.17-2.40  | 0.502   | SLC2A1 rs3754219 (CC vs. AA)  | 0.85          | 0.26-2.81  | 0.790   |
| SLC2A1 rs841853 (CA vs. CC)   | 0.91          | 0.37-2.28  | 0.844   | SLC2A1 rs841853 (CA vs. CC)   | 1.20          | 0.48-3.02  | 0.697   |
| SLC2A1 rs841853 (AA vs. CC)   | 1.60          | 0.25-10.21 | 0.621   | SLC2A1 rs841853 (AA vs. CC)   | 0.28          | 0.03-2.66  | 0.267   |
| SLC2A1 rs841847 (TC vs. CC)   | 1.11          | 0.40-3.12  | 0.837   | SLC2A1 rs841847 (TC vs. CC)   | 1.82          | 0.65-5.11  | 0.258   |
| SLC2A1 rs841847 (TT vs. CC)   | 2.23          | 0.19-25.66 | 0.520   | SLC2A1 rs841847 (TT vs. CC)   | 2.64          | 0.23-30.63 | 0.437   |
| SLC2A1 rs7512565 (CT vs. CC)  | 0.63          | 0.27-1.47  | 0.284   | SLC2A1 rs7512565 (CT vs. CC)  | 0.78          | 0.31-1.93  | 0.587   |
| SLC2A1 rs7512565 (TT vs. CC)  | 0.00          | NA         | 0.999   | SLC2A1 rs7512565 (TT vs. CC)  | 1.04          | 0.06-17.38 | 0.981   |
| SLC2A1 rs2297977 (GT vs. GG)  | 4.86          | 1.59-14.83 | 0.005   | SLC2A1 rs2297977 (GT vs. GG)  | 1.29          | 0.52-3.22  | 0.583   |
| SLC2A1 rs2297977 (TT vs. GG)  | 1.52          | 0.29-8.09  | 0.624   | SLC2A1 rs2297977 (TT vs. GG)  | 3.88          | 0.38-39.63 | 0.254   |
| STAT1 rs3771300 (GT vs. TT)   | 1.30          | 0.55-3.10  | 0.555   | STAT1 rs3771300 (GT vs. TT)   | 1.60          | 0.65-3.96  | 0.309   |
| STAT1 rs3771300 (GG vs. TT)   | 1.47          | 0.40-5.48  | 0.564   | STAT1 rs3771300 (GG vs. TT)   | 0.54          | 0.12-2.38  | 0.417   |
| STAT1 rs1914408 (CT vs. CC)   | 1.89          | 0.79-4.53  | 0.153   | STAT1 rs1914408 (CT vs. CC)   | 2.50          | 0.98-6.37  | 0.055   |
| STAT1 rs1914408 (TT vs. CC)   | 0.66          | 0.17-2.51  | 0.540   | STAT1 rs1914408 (TT vs. CC)   | 2.08          | 0.49-8.78  | 0.317   |
| STAT1 rs2066804 (AG vs. GG)   | 0.98          | 0.38-2.54  | 0.967   | STAT1 rs2066804 (AG vs. GG)   | 1.57          | 0.59-4.18  | 0.362   |
| STAT1 rs2066804 (AA vs. GG)   | 0.62          | 0.21-1.84  | 0.390   | STAT1 rs2066804 (AA vs. GG)   | 1.16          | 0.37-3.66  | 0.801   |
| STAT1 rs1547550 (CG vs. GG)   | 1.36          | 0.42-4.39  | 0.612   | STAT1 rs1547550 (CG vs. GG)   | 2.31          | 0.81-6.58  | 0.119   |
| STAT1 rs1547550 (CC vs. GG)   | 1877443736.29 | NA         | 0.999   | STAT1 rs1547550 (CC vs. GG)   | -             | -          | -       |
| STAT1 rs2280232 (CA vs. AA)   | 1.49          | 0.56-3.97  | 0.425   | STAT1 rs2280232 (CA vs. AA)   | 1.56          | 0.61-3.98  | 0.357   |
| STAT1 rs2280232 (CC vs. AA)   | 0.00          | NA         | 0.999   | STAT1 rs2280232 (CC vs. AA)   | 0.00          | NA         | 0.999   |
| STAT1 rs34997637 (GA vs. AA)  | 1.35          | 0.52-3.55  | 0.541   | STAT1 rs34997637 (GA vs. AA)  | 2.50          | 0.84-7.48  | 0.101   |
| STAT1 rs34997637 (GG vs. AA)  | 3.27          | 1.05-10.16 | 0.040   | STAT1 rs34997637 (GG vs. AA)  | 2.14          | 0.66-6.98  | 0.206   |
| STAT1 rs12693591 (CA vs. CC)  | 1.01          | 0.44-2.35  | 0.977   | STAT1 rs12693591 (CA vs. CC)  | 1.41          | 0.59-3.39  | 0.439   |
| STAT1 rs12693591 (AA vs. CC)  | 2.25          | 0.38-13.40 | 0.373   | STAT1 rs12693591 (AA vs. CC)  | 0.24          | 0.03-2.26  | 0.213   |
| STAT1 rs10173099 (TC vs. TT)  | 1.05          | 0.44-2.51  | 0.921   | STAT1 rs10173099 (TC vs. TT)  | 1.70          | 0.67-4.33  | 0.265   |
| STAT1 rs10173099 (CC vs. TT)  | 3.19          | 0.86-11.88 | 0.083   | STAT1 rs10173099 (CC vs. TT)  | 1.54          | 0.44-5.42  | 0.502   |
| STAT1 rs2066802 (AG vs. AA)   | 1.07          | 0.46-2.49  | 0.883   | STAT1 rs2066802 (AG vs. AA)   | 1.17          | 0.49-2.81  | 0.727   |
| STAT1 rs2066802 (GG vs. AA)   | 1.50          | 0.30-7.39  | 0.618   | STAT1 rs2066802 (GG vs. AA)   | 1.86          | 0.28-12.16 | 0.519   |
| STAT1 rs10208033 (TC vs. CC)  | 1.89          | 0.79-4.53  | 0.153   | STAT1 rs10208033 (TC vs. CC)  | 1.75          | 0.70-4.41  | 0.235   |
| STAT1 rs10208033 (TT vs. CC)  | 2.19          | 0.59-8.09  | 0.241   | STAT1 rs10208033 (TT vs. CC)  | 1.29          | 0.36-4.64  | 0.701   |
| STAT1 rs1467199 (GC vs. CC)   | 0.65          | 0.24-1.76  | 0.396   | STAT1 rs1467199 (GC vs. CC)   | 1.59          | 0.59-4.24  | 0.357   |
| STAT1 rs1467199 (GG vs. CC)   | 0.92          | 0.30-2.82  | 0.879   | STAT1 rs1467199 (GG vs. CC)   | 0.46          | 0.14-1.54  | 0.208   |
| CTNNB1 rs3864004 (GA vs. GG)  | 0.81          | 0.35-1.87  | 0.622   | CTNNB1 rs3864004 (GA vs. GG)  | 0.65          | 0.27-1.60  | 0.347   |
| CTNNB1 rs3864004 (AA vs. GG)  | 1.50          | 0.23-9.73  | 0.671   | CTNNB1 rs3864004 (AA vs. GG)  | 1.50          | 0.23-9.80  | 0.672   |
| CTNNB1 rs75288535 (GA vs. AA) | 0.74          | 0.29-1.89  | 0.524   | CTNNB1 rs75288535 (GA vs. AA) | 0.36          | 0.12-1.06  | 0.064   |
| CTNNB1 rs75288535 (GG vs. AA) | 3.09          | 0.31-31.24 | 0.339   | CTNNB1 rs75288535 (GG vs. AA) | 0.90          | 0.21-3.96  | 0.889   |
| CTNNB1 rs1798802 (GA vs. GG)  | 0.89          | 0.38-2.07  | 0.792   | CTNNB1 rs1798802 (GA vs. GG)  | 0.64          | 0.26-1.59  | 0.338   |
| CTNNB1 rs1798802 (AA vs. GG)  | 1.39          | 0.28-6.87  | 0.687   | CTNNB1 rs1798802 (AA vs. GG)  | 1.18          | 0.27-5.15  | 0.825   |
| CTNNB1 rs11564465 (TC vs. CC) | 1.50          | 0.65-3.45  | 0.343   | CTNNB1 rs11564465 (TC vs. CC) | 0.57          | 0.22-1.46  | 0.239   |

|                                |               |            |       |
|--------------------------------|---------------|------------|-------|
| CTNNB1 rs11564465 (TT vs. CC)  | 2177379136.02 | NA         | 0.999 |
| CTNNB1 rs4135385 (AG vs. GG)   | 1.12          | 0.44-2.83  | 0.813 |
| CTNNB1 rs4135385 (AA vs. GG)   | 0.82          | 0.28-2.38  | 0.712 |
| CTNNB1 rs2293303 (CT vs. CC)   | 0.86          | 0.32-2.33  | 0.772 |
| CTNNB1 rs2293303 (TT vs. CC)   | 1705223445.23 | NA         | 1.000 |
| SERPINE1 rs2227631 (GA vs. GG) | 1.06          | 0.43-2.61  | 0.908 |
| SERPINE1 rs2227631 (AA vs. GG) | 1.31          | 0.38-4.52  | 0.674 |
| SERPINE1 rs6092 (GA vs. GG)    | 2.20          | 0.74-6.55  | 0.157 |
| SERPINE1 rs6092 (AA vs. GG)    | 0.00          | NA         | 1.000 |
| SERPINE1 rs6090 (AG vs. GG)    | 0.25          | 0.03-2.33  | 0.223 |
| SERPINE1 rs2227667 (GA vs. AA) | 0.75          | 0.30-1.87  | 0.537 |
| SERPINE1 rs2227667 (GG vs. AA) | 1.67          | 0.48-5.76  | 0.419 |
| SERPINE1 rs2227692 (TC vs. CC) | 0.84          | 0.36-1.94  | 0.680 |
| SERPINE1 rs2227692 (TT vs. CC) | 0.71          | 0.14-3.60  | 0.683 |
| SERPINE1 rs7242 (GT vs. TT)    | 0.77          | 0.28-2.13  | 0.614 |
| SERPINE1 rs7242 (GG vs. TT)    | 1.25          | 0.40-3.87  | 0.698 |
| DKK1 rs11001553 (CT vs. CC)    | 0.36          | 0.09-1.44  | 0.148 |
| DKK1 rs2241529 (GA vs. AA)     | 0.69          | 0.29-1.60  | 0.383 |
| DKK1 rs2241529 (GG vs. AA)     | 0.70          | 0.17-2.95  | 0.627 |
| DKK1 rs1569198 (GA vs. AA)     | 0.94          | 0.41-2.15  | 0.874 |
| DKK1 rs1569198 (GG vs. AA)     | 1.04          | 0.14-7.93  | 0.971 |
| IFNG rs1861494 (TC vs. TT)     | 0.94          | 0.39-2.26  | 0.895 |
| IFNG rs1861494 (CC vs. TT)     | 1.47          | 0.43-4.97  | 0.538 |
| IFNG rs2430561 (TA vs. TT)     | 0.79          | 0.31-1.97  | 0.607 |
| IFNG rs2430561 (AA vs. TT)     | -             | -          | -     |
| IFNG rs2069705 (AG vs. GG)     | 0.78          | 0.33-1.84  | 0.568 |
| IFNG rs2069705 (AA vs. GG)     | 2.00          | 0.17-23.25 | 0.580 |
| HIF1A rs2301104 (GC vs. GG)    | 1.50          | 0.32-7.08  | 0.612 |
| HIF1A rs72714570 (GC vs. CC)   | 1.06          | 0.41-2.75  | 0.909 |
| HIF1A rs72714570 (GG vs. CC)   | 0.00          | NA         | 1.000 |
| HIF1A rs2301113 (CA vs. AA)    | 1.06          | 0.44-2.56  | 0.905 |
| HIF1A rs2301113 (CC vs. AA)    | 1.50          | 0.47-4.84  | 0.497 |
| HIF1A rs11549465 (TC vs. CC)   | 4.82          | 1.25-18.59 | 0.022 |
| HIF1A rs2057482 (CT vs. CC)    | 2.07          | 0.86-4.98  | 0.104 |
| HIF1A rs2057482 (TT vs. CC)    | 2.13          | 0.33-13.70 | 0.428 |

|                                |               |            |       |
|--------------------------------|---------------|------------|-------|
| CTNNB1 rs11564465 (TT vs. CC)  | 1.45          | 0.22-9.34  | 0.698 |
| CTNNB1 rs4135385 (AG vs. GG)   | 0.49          | 0.15-1.55  | 0.223 |
| CTNNB1 rs4135385 (AA vs. GG)   | 0.34          | 0.09-1.30  | 0.116 |
| CTNNB1 rs2293303 (CT vs. CC)   | 0.90          | 0.30-2.69  | 0.849 |
| CTNNB1 rs2293303 (TT vs. CC)   | 1867892787.05 | NA         | 0.999 |
| SERPINE1 rs2227631 (GA vs. GG) | 0.76          | 0.29-2.02  | 0.585 |
| SERPINE1 rs2227631 (AA vs. GG) | 0.69          | 0.23-2.08  | 0.512 |
| SERPINE1 rs6092 (GA vs. GG)    | 0.45          | 0.11-1.88  | 0.275 |
| SERPINE1 rs6092 (AA vs. GG)    | 1702797807.33 | NA         | 1.000 |
| SERPINE1 rs6090 (AG vs. GG)    | 2008428183.00 | NA         | 0.999 |
| SERPINE1 rs2227667 (GA vs. AA) | 0.59          | 0.22-1.58  | 0.295 |
| SERPINE1 rs2227667 (GG vs. AA) | 0.96          | 0.28-3.28  | 0.954 |
| SERPINE1 rs2227692 (TC vs. CC) | 0.50          | 0.20-1.26  | 0.140 |
| SERPINE1 rs2227692 (TT vs. CC) | 3.50          | 0.64-19.30 | 0.150 |
| SERPINE1 rs7242 (GT vs. TT)    | 1.13          | 0.42-3.05  | 0.809 |
| SERPINE1 rs7242 (GG vs. TT)    | 0.95          | 0.28-3.23  | 0.929 |
| DKK1 rs11001553 (CT vs. CC)    | 1.97          | 0.71-5.43  | 0.193 |
| DKK1 rs2241529 (GA vs. AA)     | 1.68          | 0.68-4.11  | 0.258 |
| DKK1 rs2241529 (GG vs. AA)     | 1.15          | 0.27-4.96  | 0.851 |
| DKK1 rs1569198 (GA vs. AA)     | 1.30          | 0.52-3.21  | 0.577 |
| DKK1 rs1569198 (GG vs. AA)     | 0.81          | 0.12-5.22  | 0.821 |
| IFNG rs1861494 (TC vs. TT)     | 1.14          | 0.45-2.88  | 0.790 |
| IFNG rs1861494 (CC vs. TT)     | 0.16          | 0.03-0.82  | 0.028 |
| IFNG rs2430561 (TA vs. TT)     | 1.20          | 0.42-3.41  | 0.732 |
| IFNG rs2430561 (AA vs. TT)     | 0.00          | NA         | 1.000 |
| IFNG rs2069705 (AG vs. GG)     | 0.87          | 0.34-2.21  | 0.765 |
| IFNG rs2069705 (AA vs. GG)     | 1782592930.04 | NA         | 1.000 |
| HIF1A rs2301104 (GC vs. GG)    | 0.93          | 0.26-3.30  | 0.905 |
| HIF1A rs72714570 (GC vs. CC)   | 0.67          | 0.26-1.72  | 0.401 |
| HIF1A rs72714570 (GG vs. CC)   | 1.00          | 0.06-16.74 | 1.000 |
| HIF1A rs2301113 (CA vs. AA)    | 1.19          | 0.48-2.97  | 0.713 |
| HIF1A rs2301113 (CC vs. AA)    | 0.57          | 0.14-2.27  | 0.422 |
| HIF1A rs11549465 (TC vs. CC)   | 0.67          | 0.15-2.98  | 0.593 |
| HIF1A rs2057482 (CT vs. CC)    | 1.05          | 0.44-2.52  | 0.905 |
| HIF1A rs2057482 (TT vs. CC)    | 0.00          | NA         | 1.000 |

**Supplementary Table 3B** The association between each SNP and capsule formation stratified by gender

Male

| SNP (genotype)                | OR            | 95%CI      | P value |
|-------------------------------|---------------|------------|---------|
| SLC2A1 rs841858 (GT vs. GG)   | 2.34          | 1.10-4.99  | 0.028   |
| SLC2A1 rs841858 (TT vs. GG)   | 2461675951.01 | NA         | 0.999   |
| SLC2A1 rs3754219 (CA vs. AA)  | 0.74          | 0.35-1.55  | 0.420   |
| SLC2A1 rs3754219 (CC vs. AA)  | 0.54          | 0.20-1.43  | 0.214   |
| SLC2A1 rs841853 (CA vs. CC)   | 0.94          | 0.45-1.93  | 0.857   |
| SLC2A1 rs841853 (AA vs. CC)   | 1.58          | 0.34-7.42  | 0.565   |
| SLC2A1 rs841847 (TC vs. CC)   | 1.28          | 0.56-2.93  | 0.559   |
| SLC2A1 rs841847 (TT vs. CC)   | 3.84          | 0.39-38.04 | 0.250   |
| SLC2A1 rs7512565 (CT vs. CC)  | 0.85          | 0.43-1.68  | 0.635   |
| SLC2A1 rs7512565 (TT vs. CC)  | 0.00          | NA         | 0.999   |
| SLC2A1 rs2297977 (GT vs. GG)  | 2.68          | 1.27-5.64  | 0.010   |
| SLC2A1 rs2297977 (TT vs. GG)  | 3.30          | 0.58-18.90 | 0.180   |
| STAT1 rs3771300 (GT vs. TT)   | 1.35          | 0.67-2.74  | 0.400   |
| STAT1 rs3771300 (GG vs. TT)   | 0.91          | 0.31-2.65  | 0.866   |
| STAT1 rs1914408 (CT vs. CC)   | 2.09          | 1.03-4.27  | 0.043   |
| STAT1 rs1914408 (TT vs. CC)   | 0.99          | 0.34-2.84  | 0.981   |
| STAT1 rs2066804 (AG vs. GG)   | 1.33          | 0.62-2.88  | 0.464   |
| STAT1 rs2066804 (AA vs. GG)   | 0.78          | 0.33-1.87  | 0.579   |
| STAT1 rs1547550 (CG vs. GG)   | 2.25          | 0.94-5.38  | 0.068   |
| STAT1 rs1547550 (CC vs. GG)   | 2274852329.73 | NA         | 0.999   |
| STAT1 rs2280232 (CA vs. AA)   | 1.48          | 0.70-3.13  | 0.309   |
| STAT1 rs2280232 (CC vs. AA)   | 0.00          | NA         | 0.999   |
| STAT1 rs34997637 (GA vs. AA)  | 2.03          | 0.90-4.60  | 0.088   |
| STAT1 rs34997637 (GG vs. AA)  | 3.21          | 1.29-8.00  | 0.012   |
| STAT1 rs12693591 (CA vs. CC)  | 1.37          | 0.69-2.72  | 0.366   |
| STAT1 rs12693591 (AA vs. CC)  | 0.88          | 0.23-3.37  | 0.855   |
| STAT1 rs10173099 (TC vs. TT)  | 1.81          | 0.88-3.73  | 0.108   |
| STAT1 rs10173099 (CC vs. TT)  | 2.82          | 1.04-7.60  | 0.041   |
| STAT1 rs2066802 (AG vs. AA)   | 1.19          | 0.60-2.36  | 0.627   |
| STAT1 rs2066802 (GG vs. AA)   | 1.28          | 0.34-4.76  | 0.715   |
| STAT1 rs10208033 (TC vs. CC)  | 2.53          | 1.24-5.20  | 0.011   |
| STAT1 rs10208033 (TT vs. CC)  | 2.17          | 0.77-6.13  | 0.143   |
| STAT1 rs1467199 (GC vs. CC)   | 0.72          | 0.32-1.60  | 0.419   |
| STAT1 rs1467199 (GG vs. CC)   | 0.44          | 0.18-1.09  | 0.074   |
| CTNNB1 rs3864004 (GA vs. GG)  | 0.69          | 0.35-1.38  | 0.295   |
| CTNNB1 rs3864004 (AA vs. GG)  | 1.03          | 0.24-4.38  | 0.973   |
| CTNNB1 rs75288535 (GA vs. AA) | 0.68          | 0.31-1.50  | 0.336   |
| CTNNB1 rs75288535 (GG vs. AA) | 2.30          | 0.54-9.70  | 0.257   |
| CTNNB1 rs1798802 (GA vs. GG)  | 0.61          | 0.31-1.22  | 0.162   |
| CTNNB1 rs1798802 (AA vs. GG)  | 0.94          | 0.28-3.22  | 0.925   |
| CTNNB1 rs11564465 (TC vs. CC) | 0.89          | 0.44-1.78  | 0.737   |

Female

| SNP (genotype)                | OR            | 95%CI       | P value |
|-------------------------------|---------------|-------------|---------|
| SLC2A1 rs841858 (GT vs. GG)   | 1.73          | 0.27-11.05  | 0.561   |
| SLC2A1 rs841858 (TT vs. GG)   | 0.87          | 0.05-15.28  | 0.922   |
| SLC2A1 rs3754219 (CA vs. AA)  | 2.84          | 0.63-12.89  | 0.175   |
| SLC2A1 rs3754219 (CC vs. AA)  | 5.25          | 0.40-68.95  | 0.207   |
| SLC2A1 rs841853 (CA vs. CC)   | 1.80          | 0.37-8.75   | 0.469   |
| SLC2A1 rs841853 (AA vs. CC)   | 0.00          | NA          | 0.999   |
| SLC2A1 rs841847 (TC vs. CC)   | 1.85          | 0.38-9.08   | 0.451   |
| SLC2A1 rs841847 (TT vs. CC)   | 0.92          | 0.05-16.46  | 0.957   |
| SLC2A1 rs7512565 (CT vs. CC)  | 0.31          | 0.07-1.36   | 0.120   |
| SLC2A1 rs7512565 (TT vs. CC)  | 0.53          | 0.03-9.71   | 0.671   |
| SLC2A1 rs2297977 (GT vs. GG)  | 1.05          | 0.19-5.69   | 0.957   |
| SLC2A1 rs2297977 (TT vs. GG)  | 0.79          | 0.10-6.50   | 0.823   |
| STAT1 rs3771300 (GT vs. TT)   | 1.67          | 0.41-6.82   | 0.477   |
| STAT1 rs3771300 (GG vs. TT)   | 1.00          | 0.11-8.95   | 1.000   |
| STAT1 rs1914408 (CT vs. CC)   | 2.50          | 0.60-10.34  | 0.206   |
| STAT1 rs1914408 (TT vs. CC)   | 2.50          | 0.19-32.80  | 0.485   |
| STAT1 rs2066804 (AG vs. GG)   | 0.96          | 0.23-4.10   | 0.961   |
| STAT1 rs2066804 (AA vs. GG)   | 1.71          | 0.23-12.89  | 0.601   |
| STAT1 rs1547550 (CG vs. GG)   | 0.77          | 0.13-4.43   | 0.765   |
| STAT1 rs1547550 (CC vs. GG)   | -             | -           | -       |
| STAT1 rs2280232 (CA vs. AA)   | 1.71          | 0.35-8.37   | 0.505   |
| STAT1 rs2280232 (CC vs. AA)   | 0.00          | NA          | 1.000   |
| STAT1 rs34997637 (GA vs. AA)  | 1.03          | 0.20-5.33   | 0.973   |
| STAT1 rs34997637 (GG vs. AA)  | 0.96          | 0.16-5.64   | 0.964   |
| STAT1 rs12693591 (CA vs. CC)  | 0.56          | 0.14-2.26   | 0.411   |
| STAT1 rs12693591 (AA vs. CC)  | 0.56          | 0.03-10.93  | 0.699   |
| STAT1 rs10173099 (TC vs. TT)  | 0.39          | 0.09-1.67   | 0.204   |
| STAT1 rs10173099 (CC vs. TT)  | 0.75          | 0.09-6.04   | 0.787   |
| STAT1 rs2066802 (AG vs. AA)   | 0.78          | 0.20-3.01   | 0.716   |
| STAT1 rs2066802 (GG vs. AA)   | 1256480433.33 | NA          | 0.999   |
| STAT1 rs10208033 (TC vs. CC)  | 0.34          | 0.07-1.68   | 0.184   |
| STAT1 rs10208033 (TT vs. CC)  | 0.38          | 0.05-3.00   | 0.355   |
| STAT1 rs1467199 (GC vs. CC)   | 3.00          | 0.68-13.31  | 0.148   |
| STAT1 rs1467199 (GG vs. CC)   | 9.00          | 0.81-100.14 | 0.074   |
| CTNNB1 rs3864004 (GA vs. GG)  | 0.90          | 0.23-3.58   | 0.881   |
| CTNNB1 rs3864004 (AA vs. GG)  | 1453927358.57 | NA          | 0.999   |
| CTNNB1 rs75288535 (GA vs. AA) | 0.19          | 0.04-0.95   | 0.043   |
| CTNNB1 rs75288535 (GG vs. AA) | 0.22          | 0.02-2.83   | 0.244   |
| CTNNB1 rs1798802 (GA vs. GG)  | 1.93          | 0.46-8.05   | 0.368   |
| CTNNB1 rs1798802 (AA vs. GG)  | 3.86          | 0.33-45.57  | 0.284   |
| CTNNB1 rs11564465 (TC vs. CC) | 1.33          | 0.34-5.27   | 0.682   |



|                                |               |            |       |
|--------------------------------|---------------|------------|-------|
| CTNNB1 rs11564465 (TT vs. CC)  | 2.34          | 0.41-13.45 | 0.340 |
| CTNNB1 rs4135385 (AG vs. GG)   | 0.85          | 0.39-1.84  | 0.674 |
| CTNNB1 rs4135385 (AA vs. GG)   | 0.50          | 0.20-1.26  | 0.140 |
| CTNNB1 rs2293303 (CT vs. CC)   | 0.69          | 0.30-1.59  | 0.384 |
| CTNNB1 rs2293303 (TT vs. CC)   | 1824888248.41 | NA         | 0.999 |
| SERPINE1 rs2227631 (GA vs. GG) | 0.73          | 0.35-1.51  | 0.399 |
| SERPINE1 rs2227631 (AA vs. GG) | 0.57          | 0.23-1.41  | 0.226 |
| SERPINE1 rs6092 (GA vs. GG)    | 1.51          | 0.61-3.74  | 0.379 |
| SERPINE1 rs6092 (AA vs. GG)    | -             | -          | -     |
| SERPINE1 rs6090 (AG vs. GG)    | 0.58          | 0.10-3.25  | 0.533 |
| SERPINE1 rs2227667 (GA vs. AA) | 0.83          | 0.39-1.75  | 0.619 |
| SERPINE1 rs2227667 (GG vs. AA) | 1.92          | 0.72-5.16  | 0.196 |
| SERPINE1 rs2227692 (TC vs. CC) | 0.79          | 0.40-1.59  | 0.515 |
| SERPINE1 rs2227692 (TT vs. CC) | 2.01          | 0.60-6.76  | 0.261 |
| SERPINE1 rs7242 (GT vs. TT)    | 0.69          | 0.31-1.54  | 0.368 |
| SERPINE1 rs7242 (GG vs. TT)    | 0.85          | 0.35-2.11  | 0.730 |
| DKK1 rs11001553 (CT vs. CC)    | 0.98          | 0.39-2.44  | 0.964 |
| DKK1 rs2241529 (GA vs. AA)     | 1.01          | 0.51-2.01  | 0.983 |
| DKK1 rs2241529 (GG vs. AA)     | 1.04          | 0.34-3.18  | 0.946 |
| DKK1 rs1569198 (GA vs. AA)     | 1.14          | 0.57-2.28  | 0.720 |
| DKK1 rs1569198 (GG vs. AA)     | 0.99          | 0.25-3.92  | 0.982 |
| IFNG rs1861494 (TC vs. TT)     | 0.85          | 0.42-1.73  | 0.660 |
| IFNG rs1861494 (CC vs. TT)     | 0.53          | 0.20-1.44  | 0.216 |
| IFNG rs2430561 (TA vs. TT)     | 0.91          | 0.42-1.98  | 0.818 |
| IFNG rs2430561 (AA vs. TT)     | 0.00          | NA         | 1.000 |
| IFNG rs2069705 (AG vs. GG)     | 0.89          | 0.44-1.80  | 0.744 |
| IFNG rs2069705 (AA vs. GG)     | 2.31          | 0.20-26.34 | 0.500 |
| HIF1A rs2301104 (GC vs. GG)    | 0.89          | 0.29-2.70  | 0.834 |
| HIF1A rs72714570 (GC vs. CC)   | 0.91          | 0.43-1.91  | 0.796 |
| HIF1A rs72714570 (GG vs. CC)   | 0.00          | NA         | 0.999 |
| HIF1A rs2301113 (CA vs. AA)    | 1.16          | 0.57-2.36  | 0.690 |
| HIF1A rs2301113 (CC vs. AA)    | 0.72          | 0.27-1.90  | 0.502 |
| HIF1A rs11549465 (TC vs. CC)   | 2.39          | 0.83-6.86  | 0.105 |
| HIF1A rs2057482 (CT vs. CC)    | 1.22          | 0.61-2.46  | 0.569 |
| HIF1A rs2057482 (TT vs. CC)    | 1.28          | 0.24-6.66  | 0.773 |

|                                |               |            |       |
|--------------------------------|---------------|------------|-------|
| CTNNB1 rs11564465 (TT vs. CC)  | 1615474842.85 | NA         | 0.999 |
| CTNNB1 rs4135385 (AG vs. GG)   | 0.60          | 0.11-3.30  | 0.557 |
| CTNNB1 rs4135385 (AA vs. GG)   | 0.90          | 0.13-6.08  | 0.914 |
| CTNNB1 rs2293303 (CT vs. CC)   | 2.50          | 0.41-15.12 | 0.318 |
| CTNNB1 rs2293303 (TT vs. CC)   | 1615474842.85 | NA         | 1.000 |
| SERPINE1 rs2227631 (GA vs. GG) | 2.14          | 0.47-9.70  | 0.324 |
| SERPINE1 rs2227631 (AA vs. GG) | 2827080974.99 | NA         | 0.999 |
| SERPINE1 rs6092 (GA vs. GG)    | 0.47          | 0.07-3.26  | 0.445 |
| SERPINE1 rs6092 (AA vs. GG)    | 0.71          | 0.04-12.43 | 0.812 |
| SERPINE1 rs6090 (AG vs. GG)    | 1520446910.92 | NA         | 0.999 |
| SERPINE1 rs2227667 (GA vs. AA) | 0.30          | 0.06-1.49  | 0.140 |
| SERPINE1 rs2227667 (GG vs. AA) | 0.25          | 0.03-1.82  | 0.171 |
| SERPINE1 rs2227692 (TC vs. CC) | 0.32          | 0.08-1.33  | 0.117 |
| SERPINE1 rs2227692 (TT vs. CC) | 0.91          | 0.07-12.52 | 0.943 |
| SERPINE1 rs7242 (GT vs. TT)    | 3.00          | 0.58-15.61 | 0.192 |
| SERPINE1 rs7242 (GG vs. TT)    | 5.00          | 0.58-42.80 | 0.142 |
| DKK1 rs11001553 (CT vs. CC)    | 1.00          | 0.22-4.56  | 1.000 |
| DKK1 rs2241529 (GA vs. AA)     | 1.03          | 0.26-4.17  | 0.966 |
| DKK1 rs2241529 (GG vs. AA)     | 0.38          | 0.03-5.17  | 0.464 |
| DKK1 rs1569198 (GA vs. AA)     | 0.82          | 0.22-3.06  | 0.765 |
| DKK1 rs1569198 (GG vs. AA)     | -             | -          | -     |
| IFNG rs1861494 (TC vs. TT)     | 2.33          | 0.54-10.11 | 0.257 |
| IFNG rs1861494 (CC vs. TT)     | 0.78          | 0.10-6.32  | 0.814 |
| IFNG rs2430561 (TA vs. TT)     | 1.07          | 0.23-4.92  | 0.929 |
| IFNG rs2430561 (AA vs. TT)     | -             | -          | -     |
| IFNG rs2069705 (AG vs. GG)     | 0.60          | 0.14-2.51  | 0.479 |
| IFNG rs2069705 (AA vs. GG)     | 1153910602.04 | NA         | 1.000 |
| HIF1A rs2301104 (GC vs. GG)    | 2.65          | 0.25-28.24 | 0.420 |
| HIF1A rs72714570 (GC vs. CC)   | 0.59          | 0.13-2.70  | 0.494 |
| HIF1A rs72714570 (GG vs. CC)   | 1184681551.42 | NA         | 1.000 |
| HIF1A rs2301113 (CA vs. AA)    | 1.00          | 0.25-4.04  | 1.000 |
| HIF1A rs2301113 (CC vs. AA)    | 1615474842.85 | NA         | 0.999 |
| HIF1A rs11549465 (TC vs. CC)   | 1.31          | 0.19-9.02  | 0.782 |
| HIF1A rs2057482 (CT vs. CC)    | 2.69          | 0.68-10.65 | 0.159 |
| HIF1A rs2057482 (TT vs. CC)    | -             | -          | -     |

**Supplementary Table 3C** The association between each SNP and capsule formation stratified by liver cirrhosis

No

Yes

| SNP (genotype)                | OR            | 95%CI      | <i>P</i> value |
|-------------------------------|---------------|------------|----------------|
| SLC2A1 rs841858 (GT vs. GG)   | 1.91          | 0.16-22.20 | 0.605          |
| SLC2A1 rs841858 (TT vs. GG)   | -             | -          | -              |
| SLC2A1 rs3754219 (CA vs. AA)  | 0.29          | 0.03-3.37  | 0.324          |
| SLC2A1 rs3754219 (CC vs. AA)  | 0.75          | 0.03-17.51 | 0.858          |
| SLC2A1 rs841853 (CA vs. CC)   | 1615474842.85 | NA         | 0.999          |
| SLC2A1 rs841853 (AA vs. CC)   | -             | -          | -              |
| SLC2A1 rs841847 (TC vs. CC)   | 1292379874.28 | NA         | 0.999          |
| SLC2A1 rs841847 (TT vs. CC)   | -             | -          | -              |
| SLC2A1 rs7512565 (CT vs. CC)  | 0.30          | 0.04-2.11  | 0.227          |
| SLC2A1 rs7512565 (TT vs. CC)  | 0.00          | 0-         | 1.000          |
| SLC2A1 rs2297977 (GT vs. GG)  | 1.27          | 0.10-16.81 | 0.855          |
| SLC2A1 rs2297977 (TT vs. GG)  | 1028029445.45 | NA         | 1.000          |
| STAT1 rs3771300 (GT vs. TT)   | 1.43          | 0.18-11.09 | 0.733          |
| STAT1 rs3771300 (GG vs. TT)   | 2.14          | 0.17-27.10 | 0.556          |
| STAT1 rs1914408 (CT vs. CC)   | 1.11          | 0.16-7.51  | 0.914          |
| STAT1 rs1914408 (TT vs. CC)   | 2.00          | 0.15-26.73 | 0.600          |
| STAT1 rs2066804 (AG vs. GG)   | 3.00          | 0.23-39.61 | 0.404          |
| STAT1 rs2066804 (AA vs. GG)   | 0.60          | 0.08-4.40  | 0.615          |
| STAT1 rs1547550 (CG vs. GG)   | 0.54          | 0.03-9.99  | 0.678          |
| STAT1 rs1547550 (CC vs. GG)   | -             | -          | -              |
| STAT1 rs2280232 (CA vs. AA)   | 1.17          | 0.09-15.32 | 0.907          |
| STAT1 rs2280232 (CC vs. AA)   | -             | -          | -              |
| STAT1 rs34997637 (GA vs. AA)  | 2.50          | 0.29-21.40 | 0.403          |
| STAT1 rs34997637 (GG vs. AA)  | 7.50          | 0.62-90.65 | 0.113          |
| STAT1 rs12693591 (CA vs. CC)  | 4.29          | 0.39-47.63 | 0.236          |
| STAT1 rs12693591 (AA vs. CC)  | 1.71          | 0.12-23.94 | 0.689          |
| STAT1 rs10173099 (TC vs. TT)  | 7.50          | 0.62-90.65 | 0.113          |
| STAT1 rs10173099 (CC vs. TT)  | 7.50          | 0.62-90.65 | 0.113          |
| STAT1 rs2066802 (AG vs. AA)   | 2.50          | 0.34-18.33 | 0.367          |
| STAT1 rs2066802 (GG vs. AA)   | 1.67          | 0.12-24.26 | 0.708          |
| STAT1 rs10208033 (TC vs. CC)  | 5.00          | 0.66-38.15 | 0.121          |
| STAT1 rs10208033 (TT vs. CC)  | 2.50          | 0.16-38.60 | 0.512          |
| STAT1 rs1467199 (GC vs. CC)   | 0.50          | 0.04-6.68  | 0.600          |
| STAT1 rs1467199 (GG vs. CC)   | 0.25          | 0.02-3.34  | 0.295          |
| CTNNB1 rs3864004 (GA vs. GG)  | 1.67          | 0.28-9.82  | 0.572          |
| CTNNB1 rs3864004 (AA vs. GG)  | -             | -          | -              |
| CTNNB1 rs75288535 (GA vs. AA) | 0.27          | 0.03-2.25  | 0.224          |
| CTNNB1 rs75288535 (GG vs. AA) | 0.80          | 0.06-11.50 | 0.870          |
| CTNNB1 rs1798802 (GA vs. GG)  | 1.39          | 0.22-8.92  | 0.729          |
| CTNNB1 rs1798802 (AA vs. GG)  | 1346229035.71 | NA         | 0.999          |
| CTNNB1 rs11564465 (TC vs. CC) | 1.67          | 0.28-9.82  | 0.572          |

| SNP (genotype)                | OR            | 95%CI      | <i>P</i> value |
|-------------------------------|---------------|------------|----------------|
| SLC2A1 rs841858 (GT vs. GG)   | 2.28          | 1.10-4.76  | 0.028          |
| SLC2A1 rs841858 (TT vs. GG)   | 4.57          | 0.46-45.24 | 0.194          |
| SLC2A1 rs3754219 (CA vs. AA)  | 1.07          | 0.53-2.16  | 0.862          |
| SLC2A1 rs3754219 (CC vs. AA)  | 0.69          | 0.27-1.80  | 0.449          |
| SLC2A1 rs841853 (CA vs. CC)   | 0.82          | 0.41-1.64  | 0.567          |
| SLC2A1 rs841853 (AA vs. CC)   | 0.74          | 0.20-2.76  | 0.648          |
| SLC2A1 rs841847 (TC vs. CC)   | 1.21          | 0.56-2.61  | 0.632          |
| SLC2A1 rs841847 (TT vs. CC)   | 2.57          | 0.45-14.55 | 0.287          |
| SLC2A1 rs7512565 (CT vs. CC)  | 0.70          | 0.36-1.38  | 0.308          |
| SLC2A1 rs7512565 (TT vs. CC)  | 0.35          | 0.04-3.44  | 0.365          |
| SLC2A1 rs2297977 (GT vs. GG)  | 2.53          | 1.24-5.15  | 0.011          |
| SLC2A1 rs2297977 (TT vs. GG)  | 2.03          | 0.52-8.01  | 0.312          |
| STAT1 rs3771300 (GT vs. TT)   | 1.49          | 0.77-2.89  | 0.241          |
| STAT1 rs3771300 (GG vs. TT)   | 0.74          | 0.25-2.19  | 0.584          |
| STAT1 rs1914408 (CT vs. CC)   | 2.37          | 1.20-4.67  | 0.013          |
| STAT1 rs1914408 (TT vs. CC)   | 0.90          | 0.30-2.67  | 0.846          |
| STAT1 rs2066804 (AG vs. GG)   | 1.24          | 0.60-2.55  | 0.562          |
| STAT1 rs2066804 (AA vs. GG)   | 0.87          | 0.37-2.05  | 0.747          |
| STAT1 rs1547550 (CG vs. GG)   | 2.12          | 0.94-4.78  | 0.069          |
| STAT1 rs1547550 (CC vs. GG)   | 2286049305.92 | NA         | 0.999          |
| STAT1 rs2280232 (CA vs. AA)   | 1.65          | 0.81-3.35  | 0.165          |
| STAT1 rs2280232 (CC vs. AA)   | 0.00          | NA         | 0.999          |
| STAT1 rs34997637 (GA vs. AA)  | 1.85          | 0.84-4.05  | 0.126          |
| STAT1 rs34997637 (GG vs. AA)  | 2.30          | 0.96-5.53  | 0.063          |
| STAT1 rs12693591 (CA vs. CC)  | 1.12          | 0.59-2.13  | 0.723          |
| STAT1 rs12693591 (AA vs. CC)  | 0.61          | 0.14-2.62  | 0.507          |
| STAT1 rs10173099 (TC vs. TT)  | 1.17          | 0.59-2.29  | 0.658          |
| STAT1 rs10173099 (CC vs. TT)  | 1.64          | 0.62-4.36  | 0.317          |
| STAT1 rs2066802 (AG vs. AA)   | 1.02          | 0.53-1.95  | 0.953          |
| STAT1 rs2066802 (GG vs. AA)   | 1.54          | 0.39-6.12  | 0.541          |
| STAT1 rs10208033 (TC vs. CC)  | 1.62          | 0.82-3.19  | 0.161          |
| STAT1 rs10208033 (TT vs. CC)  | 1.58          | 0.60-4.16  | 0.357          |
| STAT1 rs1467199 (GC vs. CC)   | 1.05          | 0.51-2.18  | 0.898          |
| STAT1 rs1467199 (GG vs. CC)   | 0.74          | 0.31-1.76  | 0.498          |
| CTNNB1 rs3864004 (GA vs. GG)  | 0.63          | 0.33-1.23  | 0.179          |
| CTNNB1 rs3864004 (AA vs. GG)  | 1.57          | 0.41-5.95  | 0.507          |
| CTNNB1 rs75288535 (GA vs. AA) | 0.58          | 0.27-1.23  | 0.153          |
| CTNNB1 rs75288535 (GG vs. AA) | 1.34          | 0.34-5.27  | 0.671          |
| CTNNB1 rs1798802 (GA vs. GG)  | 0.72          | 0.37-1.38  | 0.319          |
| CTNNB1 rs1798802 (AA vs. GG)  | 0.88          | 0.27-2.88  | 0.834          |
| CTNNB1 rs11564465 (TC vs. CC) | 0.87          | 0.44-1.69  | 0.673          |

|                                |              |            |       |
|--------------------------------|--------------|------------|-------|
| CTNNB1 rs11564465 (TT vs. CC)  | -            | -          | -     |
| CTNNB1 rs4135385 (AG vs. GG)   | 0.50         | 0.06-4.09  | 0.518 |
| CTNNB1 rs4135385 (AA vs. GG)   | 2.50         | 0.16-38.60 | 0.512 |
| CTNNB1 rs2293303 (CT vs. CC)   | 1.20         | 0.17-8.66  | 0.857 |
| CTNNB1 rs2293303 (TT vs. CC)   | -            | -          | -     |
| SERPINE1 rs2227631 (GA vs. GG) | 1.00         | 0.14-7.10  | 1.000 |
| SERPINE1 rs2227631 (AA vs. GG) | 0.50         | 0.05-5.51  | 0.571 |
| SERPINE1 rs6092 (GA vs. GG)    | 0.55         | 0.06-4.91  | 0.589 |
| SERPINE1 rs6092 (AA vs. GG)    | 881168096.10 | NA         | 1.000 |
| SERPINE1 rs6090 (AG vs. GG)    | 994138364.83 | NA         | 1.000 |
| SERPINE1 rs2227667 (GA vs. AA) | 1.78         | 0.19-16.49 | 0.613 |
| SERPINE1 rs2227667 (GG vs. AA) | 0.67         | 0.06-7.35  | 0.741 |
| SERPINE1 rs2227692 (TC vs. CC) | 1.40         | 0.20-10.03 | 0.738 |
| SERPINE1 rs2227692 (TT vs. CC) | 0.60         | 0.05-6.80  | 0.680 |
| SERPINE1 rs7242 (GT vs. TT)    | 0.83         | 0.11-6.11  | 0.858 |
| SERPINE1 rs7242 (GG vs. TT)    | 0.75         | 0.08-7.21  | 0.803 |
| DKK1 rs11001553 (CT vs. CC)    | 0.28         | 0.04-2.20  | 0.225 |
| DKK1 rs2241529 (GA vs. AA)     | 0.88         | 0.14-5.58  | 0.888 |
| DKK1 rs2241529 (GG vs. AA)     | 0.50         | 0.02-11.09 | 0.661 |
| DKK1 rs1569198 (GA vs. AA)     | 1.25         | 0.21-7.41  | 0.806 |
| DKK1 rs1569198 (GG vs. AA)     | -            | -          | -     |
| IFNG rs1861494 (TC vs. TT)     | 7.00         | 0.61-79.87 | 0.117 |
| IFNG rs1861494 (CC vs. TT)     | 1.00         | 0.10-10.17 | 1.000 |
| IFNG rs2430561 (TA vs. TT)     | 0.42         | 0.05-3.84  | 0.440 |
| IFNG rs2430561 (AA vs. TT)     | 0.00         | NA         | 1.000 |
| IFNG rs2069705 (AG vs. GG)     | 0.40         | 0.06-2.89  | 0.363 |
| IFNG rs2069705 (AA vs. GG)     | 0.40         | 0.02-8.07  | 0.550 |
| HIF1A rs2301104 (GC vs. GG)    | 994138364.83 | NA         | 1.000 |
| HIF1A rs72714570 (GC vs. CC)   | 0.82         | 0.11-6.34  | 0.848 |
| HIF1A rs72714570 (GG vs. CC)   | -            | -          | -     |
| HIF1A rs2301113 (CA vs. AA)    | 0.19         | 0.03-1.43  | 0.107 |
| HIF1A rs2301113 (CC vs. AA)    | 461564240.82 | NA         | 0.999 |
| HIF1A rs11549465 (TC vs. CC)   | 0.28         | 0.04-2.20  | 0.225 |
| HIF1A rs2057482 (CT vs. CC)    | 0.30         | 0.05-1.94  | 0.206 |
| HIF1A rs2057482 (TT vs. CC)    | 605803066.07 | NA         | 0.999 |

|                                |               |            |       |
|--------------------------------|---------------|------------|-------|
| CTNNB1 rs11564465 (TT vs. CC)  | 3.61          | 0.69-18.81 | 0.127 |
| CTNNB1 rs4135385 (AG vs. GG)   | 0.86          | 0.41-1.82  | 0.691 |
| CTNNB1 rs4135385 (AA vs. GG)   | 0.48          | 0.20-1.17  | 0.105 |
| CTNNB1 rs2293303 (CT vs. CC)   | 0.79          | 0.35-1.78  | 0.575 |
| CTNNB1 rs2293303 (TT vs. CC)   | 1921858002.70 | NA         | 0.999 |
| SERPINE1 rs2227631 (GA vs. GG) | 0.90          | 0.45-1.79  | 0.761 |
| SERPINE1 rs2227631 (AA vs. GG) | 1.00          | 0.42-2.39  | 0.992 |
| SERPINE1 rs6092 (GA vs. GG)    | 1.34          | 0.55-3.25  | 0.516 |
| SERPINE1 rs6092 (AA vs. GG)    | 0.00          | NA         | 1.000 |
| SERPINE1 rs6090 (AG vs. GG)    | 1.20          | 0.29-4.99  | 0.799 |
| SERPINE1 rs2227667 (GA vs. AA) | 0.58          | 0.29-1.19  | 0.137 |
| SERPINE1 rs2227667 (GG vs. AA) | 1.40          | 0.54-3.59  | 0.486 |
| SERPINE1 rs2227692 (TC vs. CC) | 0.60          | 0.31-1.16  | 0.126 |
| SERPINE1 rs2227692 (TT vs. CC) | 2.18          | 0.61-7.82  | 0.232 |
| SERPINE1 rs7242 (GT vs. TT)    | 1.06          | 0.48-2.31  | 0.892 |
| SERPINE1 rs7242 (GG vs. TT)    | 1.31          | 0.53-3.22  | 0.553 |
| DKK1 rs11001553 (CT vs. CC)    | 1.23          | 0.53-2.86  | 0.625 |
| DKK1 rs2241529 (GA vs. AA)     | 1.04          | 0.54-2.01  | 0.900 |
| DKK1 rs2241529 (GG vs. AA)     | 0.94          | 0.32-2.78  | 0.908 |
| DKK1 rs1569198 (GA vs. AA)     | 1.06          | 0.55-2.04  | 0.868 |
| DKK1 rs1569198 (GG vs. AA)     | 0.97          | 0.25-3.85  | 0.967 |
| IFNG rs1861494 (TC vs. TT)     | 0.90          | 0.46-1.77  | 0.759 |
| IFNG rs1861494 (CC vs. TT)     | 0.52          | 0.19-1.38  | 0.187 |
| IFNG rs2430561 (TA vs. TT)     | 1.07          | 0.52-2.21  | 0.860 |
| IFNG rs2430561 (AA vs. TT)     | -             | -          | -     |
| IFNG rs2069705 (AG vs. GG)     | 0.90          | 0.46-1.76  | 0.754 |
| IFNG rs2069705 (AA vs. GG)     | 1912194711.95 | NA         | 0.999 |
| HIF1A rs2301104 (GC vs. GG)    | 1.08          | 0.40-2.97  | 0.876 |
| HIF1A rs72714570 (GC vs. CC)   | 0.85          | 0.42-1.73  | 0.648 |
| HIF1A rs72714570 (GG vs. CC)   | 0.57          | 0.05-6.40  | 0.645 |
| HIF1A rs2301113 (CA vs. AA)    | 1.42          | 0.72-2.81  | 0.311 |
| HIF1A rs2301113 (CC vs. AA)    | 0.92          | 0.36-2.38  | 0.868 |
| HIF1A rs11549465 (TC vs. CC)   | 3.28          | 1.10-9.81  | 0.034 |
| HIF1A rs2057482 (CT vs. CC)    | 1.78          | 0.92-3.45  | 0.086 |
| HIF1A rs2057482 (TT vs. CC)    | 0.48          | 0.05-4.78  | 0.531 |

**Supplementary Table 3D** The association between each SNP and capsule formation stratified by tumor number

Solitary

Multinodular

| SNP (genotype)                | OR            | 95%CI      | P value |
|-------------------------------|---------------|------------|---------|
| SLC2A1 rs841858 (GT vs. GG)   | 2.96          | 1.07-8.22  | 0.037   |
| SLC2A1 rs841858 (TT vs. GG)   | 2.59          | 0.22-30.12 | 0.446   |
| SLC2A1 rs3754219 (CA vs. AA)  | 1.00          | 0.39-2.56  | 1.000   |
| SLC2A1 rs3754219 (CC vs. AA)  | 1.50          | 0.34-6.59  | 0.591   |
| SLC2A1 rs841853 (CA vs. CC)   | 0.75          | 0.31-1.85  | 0.536   |
| SLC2A1 rs841853 (AA vs. CC)   | 0.27          | 0.03-2.75  | 0.268   |
| SLC2A1 rs841847 (TC vs. CC)   | 0.57          | 0.21-1.58  | 0.282   |
| SLC2A1 rs841847 (TT vs. CC)   | 1.71          | 0.15-19.86 | 0.666   |
| SLC2A1 rs7512565 (CT vs. CC)  | 0.44          | 0.18-1.06  | 0.067   |
| SLC2A1 rs7512565 (TT vs. CC)  | 1146466017.51 | NA         | 1.000   |
| SLC2A1 rs2297977 (GT vs. GG)  | 3.09          | 1.16-8.28  | 0.025   |
| SLC2A1 rs2297977 (TT vs. GG)  | 2.75          | 0.47-16.26 | 0.265   |
| STAT1 rs3771300 (GT vs. TT)   | 1.70          | 0.69-4.17  | 0.245   |
| STAT1 rs3771300 (GG vs. TT)   | 1.19          | 0.27-5.35  | 0.820   |
| STAT1 rs1914408 (CT vs. CC)   | 2.12          | 0.84-5.40  | 0.114   |
| STAT1 rs1914408 (TT vs. CC)   | 0.64          | 0.18-2.25  | 0.490   |
| STAT1 rs2066804 (AG vs. GG)   | 1.64          | 0.60-4.54  | 0.338   |
| STAT1 rs2066804 (AA vs. GG)   | 0.56          | 0.18-1.73  | 0.315   |
| STAT1 rs1547550 (CG vs. GG)   | 2.76          | 0.88-8.67  | 0.081   |
| STAT1 rs1547550 (CC vs. GG)   | -             | -          | -       |
| STAT1 rs2280232 (CA vs. AA)   | 2.21          | 0.82-5.92  | 0.116   |
| STAT1 rs2280232 (CC vs. AA)   | 0.00          | NA         | 0.999   |
| STAT1 rs34997637 (GA vs. AA)  | 1.80          | 0.65-5.01  | 0.261   |
| STAT1 rs34997637 (GG vs. AA)  | 3.21          | 1.04-9.88  | 0.042   |
| STAT1 rs12693591 (CA vs. CC)  | 2.03          | 0.85-4.90  | 0.113   |
| STAT1 rs12693591 (AA vs. CC)  | 0.83          | 0.13-5.41  | 0.841   |
| STAT1 rs10173099 (TC vs. TT)  | 1.93          | 0.76-4.85  | 0.165   |
| STAT1 rs10173099 (CC vs. TT)  | 2.93          | 0.83-10.32 | 0.094   |
| STAT1 rs2066802 (AG vs. AA)   | 1.11          | 0.45-2.77  | 0.816   |
| STAT1 rs2066802 (GG vs. AA)   | 1.73          | 0.37-8.03  | 0.482   |
| STAT1 rs10208033 (TC vs. CC)  | 2.56          | 1.03-6.37  | 0.044   |
| STAT1 rs10208033 (TT vs. CC)  | 1.84          | 0.48-7.12  | 0.377   |
| STAT1 rs1467199 (GC vs. CC)   | 0.88          | 0.32-2.42  | 0.803   |
| STAT1 rs1467199 (GG vs. CC)   | 0.58          | 0.18-1.91  | 0.367   |
| CTNNB1 rs3864004 (GA vs. GG)  | 0.64          | 0.26-1.55  | 0.321   |
| CTNNB1 rs3864004 (AA vs. GG)  | 0.81          | 0.15-4.42  | 0.806   |
| CTNNB1 rs75288535 (GA vs. AA) | 0.40          | 0.15-1.05  | 0.062   |
| CTNNB1 rs75288535 (GG vs. AA) | 2.27          | 0.22-23.17 | 0.488   |
| CTNNB1 rs1798802 (GA vs. GG)  | 0.74          | 0.30-1.81  | 0.507   |
| CTNNB1 rs1798802 (AA vs. GG)  | 0.66          | 0.16-2.81  | 0.575   |
| CTNNB1 rs11564465 (TC vs. CC) | 0.64          | 0.26-1.56  | 0.324   |

| SNP (genotype)                | OR            | 95%CI      | P value |
|-------------------------------|---------------|------------|---------|
| SLC2A1 rs841858 (GT vs. GG)   | 1.54          | 0.58-4.09  | 0.386   |
| SLC2A1 rs841858 (TT vs. GG)   | 2261664779.99 | NA         | 1.000   |
| SLC2A1 rs3754219 (CA vs. AA)  | 0.93          | 0.36-2.39  | 0.883   |
| SLC2A1 rs3754219 (CC vs. AA)  | 0.54          | 0.17-1.72  | 0.293   |
| SLC2A1 rs841853 (CA vs. CC)   | 1.42          | 0.55-3.66  | 0.464   |
| SLC2A1 rs841853 (AA vs. CC)   | 1.42          | 0.27-7.61  | 0.680   |
| SLC2A1 rs841847 (TC vs. CC)   | 3.94          | 1.26-12.38 | 0.019   |
| SLC2A1 rs841847 (TT vs. CC)   | 3.29          | 0.29-37.92 | 0.340   |
| SLC2A1 rs7512565 (CT vs. CC)  | 1.10          | 0.45-2.67  | 0.833   |
| SLC2A1 rs7512565 (TT vs. CC)  | 0.00          | NA         | 0.999   |
| SLC2A1 rs2297977 (GT vs. GG)  | 1.58          | 0.61-4.09  | 0.350   |
| SLC2A1 rs2297977 (TT vs. GG)  | 1.44          | 0.19-10.89 | 0.721   |
| STAT1 rs3771300 (GT vs. TT)   | 1.23          | 0.51-2.97  | 0.649   |
| STAT1 rs3771300 (GG vs. TT)   | 0.81          | 0.23-2.87  | 0.747   |
| STAT1 rs1914408 (CT vs. CC)   | 2.18          | 0.90-5.24  | 0.083   |
| STAT1 rs1914408 (TT vs. CC)   | 2.44          | 0.49-12.15 | 0.275   |
| STAT1 rs2066804 (AG vs. GG)   | 0.96          | 0.38-2.44  | 0.939   |
| STAT1 rs2066804 (AA vs. GG)   | 1.29          | 0.42-3.94  | 0.660   |
| STAT1 rs1547550 (CG vs. GG)   | 1.17          | 0.38-3.54  | 0.786   |
| STAT1 rs1547550 (CC vs. GG)   | 2153966457.14 | NA         | 0.999   |
| STAT1 rs2280232 (CA vs. AA)   | 1.02          | 0.39-2.65  | 0.975   |
| STAT1 rs2280232 (CC vs. AA)   | 0.00          | NA         | 1.000   |
| STAT1 rs34997637 (GA vs. AA)  | 1.83          | 0.66-5.12  | 0.247   |
| STAT1 rs34997637 (GG vs. AA)  | 2.00          | 0.62-6.42  | 0.244   |
| STAT1 rs12693591 (CA vs. CC)  | 0.73          | 0.31-1.71  | 0.467   |
| STAT1 rs12693591 (AA vs. CC)  | 0.82          | 0.16-4.07  | 0.806   |
| STAT1 rs10173099 (TC vs. TT)  | 0.95          | 0.39-2.30  | 0.901   |
| STAT1 rs10173099 (CC vs. TT)  | 1.53          | 0.43-5.45  | 0.511   |
| STAT1 rs2066802 (AG vs. AA)   | 1.17          | 0.51-2.70  | 0.706   |
| STAT1 rs2066802 (GG vs. AA)   | 1.35          | 0.18-10.42 | 0.773   |
| STAT1 rs10208033 (TC vs. CC)  | 1.32          | 0.54-3.24  | 0.538   |
| STAT1 rs10208033 (TT vs. CC)  | 1.53          | 0.45-5.26  | 0.497   |
| STAT1 rs1467199 (GC vs. CC)   | 1.06          | 0.40-2.77  | 0.914   |
| STAT1 rs1467199 (GG vs. CC)   | 0.82          | 0.28-2.43  | 0.721   |
| CTNNB1 rs3864004 (GA vs. GG)  | 0.82          | 0.35-1.93  | 0.655   |
| CTNNB1 rs3864004 (AA vs. GG)  | 3.63          | 0.35-37.14 | 0.278   |
| CTNNB1 rs75288535 (GA vs. AA) | 0.70          | 0.25-2.00  | 0.506   |
| CTNNB1 rs75288535 (GG vs. AA) | 1.20          | 0.28-5.21  | 0.808   |
| CTNNB1 rs1798802 (GA vs. GG)  | 0.81          | 0.34-1.89  | 0.622   |
| CTNNB1 rs1798802 (AA vs. GG)  | 3.03          | 0.53-17.39 | 0.215   |
| CTNNB1 rs11564465 (TC vs. CC) | 1.43          | 0.61-3.39  | 0.414   |

|                                |               |            |       |
|--------------------------------|---------------|------------|-------|
| CTNNB1 rs11564465 (TT vs. CC)  | 1.64          | 0.28-9.79  | 0.586 |
| CTNNB1 rs4135385 (AG vs. GG)   | 1.32          | 0.48-3.66  | 0.591 |
| CTNNB1 rs4135385 (AA vs. GG)   | 0.37          | 0.11-1.23  | 0.104 |
| CTNNB1 rs2293303 (CT vs. CC)   | 0.84          | 0.29-2.43  | 0.747 |
| CTNNB1 rs2293303 (TT vs. CC)   | 1525726240.47 | NA         | 0.999 |
| SERPINE1 rs2227631 (GA vs. GG) | 0.78          | 0.31-2.00  | 0.611 |
| SERPINE1 rs2227631 (AA vs. GG) | 0.93          | 0.28-3.03  | 0.900 |
| SERPINE1 rs6092 (GA vs. GG)    | 0.43          | 0.12-1.54  | 0.193 |
| SERPINE1 rs6092 (AA vs. GG)    | 1379063890.24 | NA         | 1.000 |
| SERPINE1 rs6090 (AG vs. GG)    | 4.10          | 0.44-38.23 | 0.216 |
| SERPINE1 rs2227667 (GA vs. AA) | 0.81          | 0.32-2.04  | 0.658 |
| SERPINE1 rs2227667 (GG vs. AA) | 0.81          | 0.19-3.43  | 0.777 |
| SERPINE1 rs2227692 (TC vs. CC) | 0.82          | 0.35-1.96  | 0.659 |
| SERPINE1 rs2227692 (TT vs. CC) | 1.81          | 0.30-11.03 | 0.520 |
| SERPINE1 rs7242 (GT vs. TT)    | 0.71          | 0.23-2.24  | 0.562 |
| SERPINE1 rs7242 (GG vs. TT)    | 0.91          | 0.26-3.18  | 0.879 |
| DKK1 rs11001553 (CT vs. CC)    | 1.25          | 0.42-3.72  | 0.687 |
| DKK1 rs2241529 (GA vs. AA)     | 1.23          | 0.51-2.97  | 0.642 |
| DKK1 rs2241529 (GG vs. AA)     | 1.05          | 0.23-4.74  | 0.952 |
| DKK1 rs1569198 (GA vs. AA)     | 1.30          | 0.54-3.11  | 0.561 |
| DKK1 rs1569198 (GG vs. AA)     | 2.16          | 0.18-25.32 | 0.540 |
| IFNG rs1861494 (TC vs. TT)     | 1.14          | 0.47-2.81  | 0.770 |
| IFNG rs1861494 (CC vs. TT)     | 0.45          | 0.11-1.76  | 0.249 |
| IFNG rs2430561 (TA vs. TT)     | 0.59          | 0.23-1.53  | 0.275 |
| IFNG rs2430561 (AA vs. TT)     | 0.00          | NA         | 1.000 |
| IFNG rs2069705 (AG vs. GG)     | 0.58          | 0.23-1.46  | 0.247 |
| IFNG rs2069705 (AA vs. GG)     | 1363056898.66 | NA         | 0.999 |
| HIF1A rs2301104 (GC vs. GG)    | 0.76          | 0.19-3.04  | 0.698 |
| HIF1A rs72714570 (GC vs. CC)   | 0.71          | 0.27-1.89  | 0.497 |
| HIF1A rs72714570 (GG vs. CC)   | 0.86          | 0.05-14.30 | 0.915 |
| HIF1A rs2301113 (CA vs. AA)    | 1.29          | 0.51-3.27  | 0.590 |
| HIF1A rs2301113 (CC vs. AA)    | 0.93          | 0.27-3.21  | 0.913 |
| HIF1A rs11549465 (TC vs. CC)   | 0.97          | 0.29-3.29  | 0.966 |
| HIF1A rs2057482 (CT vs. CC)    | 1.39          | 0.58-3.30  | 0.459 |
| HIF1A rs2057482 (TT vs. CC)    | 0.52          | 0.04-6.10  | 0.603 |

|                                |               |            |       |
|--------------------------------|---------------|------------|-------|
| CTNNB1 rs11564465 (TT vs. CC)  | 2458331282.60 | NA         | 0.999 |
| CTNNB1 rs4135385 (AG vs. GG)   | 0.51          | 0.19-1.38  | 0.183 |
| CTNNB1 rs4135385 (AA vs. GG)   | 0.92          | 0.29-2.91  | 0.891 |
| CTNNB1 rs2293303 (CT vs. CC)   | 0.93          | 0.34-2.59  | 0.892 |
| CTNNB1 rs2293303 (TT vs. CC)   | 2069827142.40 | NA         | 1.000 |
| SERPINE1 rs2227631 (GA vs. GG) | 0.98          | 0.40-2.42  | 0.961 |
| SERPINE1 rs2227631 (AA vs. GG) | 0.86          | 0.27-2.70  | 0.790 |
| SERPINE1 rs6092 (GA vs. GG)    | 2.97          | 0.93-9.53  | 0.068 |
| SERPINE1 rs6092 (AA vs. GG)    | 0.00          | NA         | 1.000 |
| SERPINE1 rs6090 (AG vs. GG)    | 0.40          | 0.04-3.98  | 0.433 |
| SERPINE1 rs2227667 (GA vs. AA) | 0.52          | 0.19-1.40  | 0.195 |
| SERPINE1 rs2227667 (GG vs. AA) | 1.68          | 0.54-5.17  | 0.370 |
| SERPINE1 rs2227692 (TC vs. CC) | 0.54          | 0.22-1.33  | 0.181 |
| SERPINE1 rs2227692 (TT vs. CC) | 1.64          | 0.40-6.76  | 0.493 |
| SERPINE1 rs7242 (GT vs. TT)    | 1.05          | 0.41-2.66  | 0.924 |
| SERPINE1 rs7242 (GG vs. TT)    | 1.18          | 0.37-3.73  | 0.782 |
| DKK1 rs11001553 (CT vs. CC)    | 0.82          | 0.27-2.52  | 0.728 |
| DKK1 rs2241529 (GA vs. AA)     | 0.92          | 0.39-2.17  | 0.843 |
| DKK1 rs2241529 (GG vs. AA)     | 0.77          | 0.19-3.15  | 0.718 |
| DKK1 rs1569198 (GA vs. AA)     | 0.92          | 0.39-2.17  | 0.842 |
| DKK1 rs1569198 (GG vs. AA)     | 0.58          | 0.10-3.44  | 0.549 |
| IFNG rs1861494 (TC vs. TT)     | 0.96          | 0.39-2.36  | 0.934 |
| IFNG rs1861494 (CC vs. TT)     | 0.71          | 0.21-2.35  | 0.570 |
| IFNG rs2430561 (TA vs. TT)     | 1.54          | 0.56-4.24  | 0.402 |
| IFNG rs2430561 (AA vs. TT)     | -             | -          | -     |
| IFNG rs2069705 (AG vs. GG)     | 1.13          | 0.47-2.72  | 0.778 |
| IFNG rs2069705 (AA vs. GG)     | 0.00          | NA         | 1.000 |
| HIF1A rs2301104 (GC vs. GG)    | 1.62          | 0.41-6.47  | 0.493 |
| HIF1A rs72714570 (GC vs. CC)   | 0.97          | 0.38-2.44  | 0.947 |
| HIF1A rs72714570 (GG vs. CC)   | 0.00          | NA         | 1.000 |
| HIF1A rs2301113 (CA vs. AA)    | 0.96          | 0.40-2.30  | 0.921 |
| HIF1A rs2301113 (CC vs. AA)    | 1.05          | 0.30-3.68  | 0.942 |
| HIF1A rs11549465 (TC vs. CC)   | 5.88          | 1.18-29.42 | 0.031 |
| HIF1A rs2057482 (CT vs. CC)    | 1.50          | 0.62-3.63  | 0.368 |
| HIF1A rs2057482 (TT vs. CC)    | 3.00          | 0.26-34.95 | 0.381 |

**Supplementary Table 3E** The association between each SNP and capsule formation stratified by tumor diameter

≤ 5 cm

> 5 cm

| SNP (genotype)                | OR            | 95%CI      | P value |
|-------------------------------|---------------|------------|---------|
| SLC2A1 rs841858 (GT vs. GG)   | 2.30          | 0.92-5.74  | 0.075   |
| SLC2A1 rs841858 (TT vs. GG)   | 3.06          | 0.27-35.19 | 0.369   |
| SLC2A1 rs3754219 (CA vs. AA)  | 0.50          | 0.22-1.16  | 0.106   |
| SLC2A1 rs3754219 (CC vs. AA)  | 0.54          | 0.16-1.82  | 0.320   |
| SLC2A1 rs841853 (CA vs. CC)   | 1.30          | 0.56-3.01  | 0.541   |
| SLC2A1 rs841853 (AA vs. CC)   | 0.78          | 0.17-3.53  | 0.747   |
| SLC2A1 rs841847 (TC vs. CC)   | 1.22          | 0.47-3.19  | 0.684   |
| SLC2A1 rs841847 (TT vs. CC)   | 2.69          | 0.47-15.50 | 0.269   |
| SLC2A1 rs7512565 (CT vs. CC)  | 1.02          | 0.45-2.27  | 0.972   |
| SLC2A1 rs7512565 (TT vs. CC)  | 0.40          | 0.04-4.02  | 0.435   |
| SLC2A1 rs2297977 (GT vs. GG)  | 1.93          | 0.78-4.80  | 0.157   |
| SLC2A1 rs2297977 (TT vs. GG)  | 3.03          | 0.52-17.57 | 0.216   |
| STAT1 rs3771300 (GT vs. TT)   | 1.22          | 0.51-2.93  | 0.652   |
| STAT1 rs3771300 (GG vs. TT)   | 1.12          | 0.34-3.70  | 0.849   |
| STAT1 rs1914408 (CT vs. CC)   | 1.77          | 0.76-4.10  | 0.186   |
| STAT1 rs1914408 (TT vs. CC)   | 1.05          | 0.35-3.17  | 0.931   |
| STAT1 rs2066804 (AG vs. GG)   | 1.36          | 0.54-3.40  | 0.514   |
| STAT1 rs2066804 (AA vs. GG)   | 0.95          | 0.36-2.51  | 0.918   |
| STAT1 rs1547550 (CG vs. GG)   | 1.99          | 0.70-5.71  | 0.199   |
| STAT1 rs1547550 (CC vs. GG)   | 2253162280.82 | NA         | 1.000   |
| STAT1 rs2280232 (CA vs. AA)   | 1.12          | 0.48-2.64  | 0.795   |
| STAT1 rs2280232 (CC vs. AA)   | 0.00          | NA         | 0.999   |
| STAT1 rs34997637 (GA vs. AA)  | 2.00          | 0.79-5.05  | 0.142   |
| STAT1 rs34997637 (GG vs. AA)  | 2.39          | 0.87-6.60  | 0.093   |
| STAT1 rs12693591 (CA vs. CC)  | 1.22          | 0.56-2.68  | 0.613   |
| STAT1 rs12693591 (AA vs. CC)  | 0.51          | 0.09-2.86  | 0.446   |
| STAT1 rs10173099 (TC vs. TT)  | 1.39          | 0.61-3.19  | 0.432   |
| STAT1 rs10173099 (CC vs. TT)  | 2.75          | 0.85-8.92  | 0.093   |
| STAT1 rs2066802 (AG vs. AA)   | 0.87          | 0.39-1.93  | 0.725   |
| STAT1 rs2066802 (GG vs. AA)   | 1.17          | 0.22-6.26  | 0.852   |
| STAT1 rs10208033 (TC vs. CC)  | 2.19          | 0.96-5.00  | 0.064   |
| STAT1 rs10208033 (TT vs. CC)  | 1.18          | 0.36-3.88  | 0.789   |
| STAT1 rs1467199 (GC vs. CC)   | 1.57          | 0.63-3.88  | 0.333   |
| STAT1 rs1467199 (GG vs. CC)   | 0.73          | 0.26-2.08  | 0.553   |
| CTNNB1 rs3864004 (GA vs. GG)  | 0.86          | 0.38-1.95  | 0.713   |
| CTNNB1 rs3864004 (AA vs. GG)  | 1.20          | 0.23-6.39  | 0.831   |
| CTNNB1 rs75288535 (GA vs. AA) | 0.51          | 0.21-1.29  | 0.155   |
| CTNNB1 rs75288535 (GG vs. AA) | 1.45          | 0.30-6.93  | 0.643   |
| CTNNB1 rs1798802 (GA vs. GG)  | 0.88          | 0.40-1.95  | 0.752   |
| CTNNB1 rs1798802 (AA vs. GG)  | 2.08          | 0.45-9.61  | 0.347   |
| CTNNB1 rs11564465 (TC vs. CC) | 1.02          | 0.45-2.32  | 0.965   |

| SNP (genotype)                | OR            | 95%CI      | P value |
|-------------------------------|---------------|------------|---------|
| SLC2A1 rs841858 (GT vs. GG)   | 1.92          | 0.65-5.64  | 0.235   |
| SLC2A1 rs841858 (TT vs. GG)   | 1809331823.99 | NA         | 1.000   |
| SLC2A1 rs3754219 (CA vs. AA)  | 3.06          | 0.94-9.97  | 0.064   |
| SLC2A1 rs3754219 (CC vs. AA)  | 1.43          | 0.35-5.79  | 0.620   |
| SLC2A1 rs841853 (CA vs. CC)   | 0.77          | 0.28-2.15  | 0.624   |
| SLC2A1 rs841853 (AA vs. CC)   | 0.85          | 0.05-14.39 | 0.911   |
| SLC2A1 rs841847 (TC vs. CC)   | 1.73          | 0.55-5.38  | 0.347   |
| SLC2A1 rs841847 (TT vs. CC)   | -             | -          | -       |
| SLC2A1 rs7512565 (CT vs. CC)  | 0.40          | 0.15-1.08  | 0.070   |
| SLC2A1 rs7512565 (TT vs. CC)  | 0.00          | NA         | 1.000   |
| SLC2A1 rs2297977 (GT vs. GG)  | 2.50          | 0.89-7.02  | 0.082   |
| SLC2A1 rs2297977 (TT vs. GG)  | 1.25          | 0.16-9.67  | 0.831   |
| STAT1 rs3771300 (GT vs. TT)   | 1.47          | 0.54-4.00  | 0.456   |
| STAT1 rs3771300 (GG vs. TT)   | 0.65          | 0.13-3.33  | 0.605   |
| STAT1 rs1914408 (CT vs. CC)   | 2.80          | 1.05-7.47  | 0.040   |
| STAT1 rs1914408 (TT vs. CC)   | 1.47          | 0.19-11.59 | 0.716   |
| STAT1 rs2066804 (AG vs. GG)   | 1.09          | 0.39-3.00  | 0.874   |
| STAT1 rs2066804 (AA vs. GG)   | 0.77          | 0.19-3.19  | 0.718   |
| STAT1 rs1547550 (CG vs. GG)   | 1.55          | 0.49-4.94  | 0.455   |
| STAT1 rs1547550 (CC vs. GG)   | 1673170372.95 | NA         | 1.000   |
| STAT1 rs2280232 (CA vs. AA)   | 2.68          | 0.83-8.62  | 0.099   |
| STAT1 rs2280232 (CC vs. AA)   | 0.00          | NA         | 1.000   |
| STAT1 rs34997637 (GA vs. AA)  | 1.43          | 0.45-4.59  | 0.549   |
| STAT1 rs34997637 (GG vs. AA)  | 2.65          | 0.70-10.06 | 0.151   |
| STAT1 rs12693591 (CA vs. CC)  | 1.13          | 0.44-2.94  | 0.797   |
| STAT1 rs12693591 (AA vs. CC)  | 1.50          | 0.22-10.08 | 0.677   |
| STAT1 rs10173099 (TC vs. TT)  | 1.21          | 0.44-3.32  | 0.705   |
| STAT1 rs10173099 (CC vs. TT)  | 1.50          | 0.39-5.84  | 0.559   |
| STAT1 rs2066802 (AG vs. AA)   | 1.53          | 0.58-4.01  | 0.390   |
| STAT1 rs2066802 (GG vs. AA)   | 2.38          | 0.38-14.70 | 0.352   |
| STAT1 rs10208033 (TC vs. CC)  | 1.39          | 0.51-3.74  | 0.521   |
| STAT1 rs10208033 (TT vs. CC)  | 2.87          | 0.62-13.37 | 0.179   |
| STAT1 rs1467199 (GC vs. CC)   | 0.52          | 0.17-1.56  | 0.243   |
| STAT1 rs1467199 (GG vs. CC)   | 0.69          | 0.19-2.53  | 0.578   |
| CTNNB1 rs3864004 (GA vs. GG)  | 0.53          | 0.20-1.37  | 0.187   |
| CTNNB1 rs3864004 (AA vs. GG)  | 2.10          | 0.20-22.33 | 0.538   |
| CTNNB1 rs75288535 (GA vs. AA) | 0.58          | 0.19-1.75  | 0.329   |
| CTNNB1 rs75288535 (GG vs. AA) | 1.23          | 0.19-8.01  | 0.827   |
| CTNNB1 rs1798802 (GA vs. GG)  | 0.56          | 0.21-1.51  | 0.252   |
| CTNNB1 rs1798802 (AA vs. GG)  | 0.67          | 0.14-3.19  | 0.612   |
| CTNNB1 rs11564465 (TC vs. CC) | 0.84          | 0.33-2.18  | 0.726   |

|                                |               |            |       |
|--------------------------------|---------------|------------|-------|
| CTNNB1 rs11564465 (TT vs. CC)  | 3.87          | 0.38-39.05 | 0.251 |
| CTNNB1 rs4135385 (AG vs. GG)   | 0.90          | 0.37-2.18  | 0.813 |
| CTNNB1 rs4135385 (AA vs. GG)   | 0.81          | 0.28-2.36  | 0.698 |
| CTNNB1 rs2293303 (CT vs. CC)   | 1.75          | 0.60-5.10  | 0.307 |
| CTNNB1 rs2293303 (TT vs. CC)   | 2195388889.00 | NA         | 1.000 |
| SERPINE1 rs2227631 (GA vs. GG) | 0.79          | 0.34-1.84  | 0.588 |
| SERPINE1 rs2227631 (AA vs. GG) | 0.58          | 0.19-1.80  | 0.349 |
| SERPINE1 rs6092 (GA vs. GG)    | 1.11          | 0.37-3.31  | 0.852 |
| SERPINE1 rs6092 (AA vs. GG)    | 2048894922.64 | NA         | 1.000 |
| SERPINE1 rs6090 (AG vs. GG)    | 1.89          | 0.30-11.80 | 0.495 |
| SERPINE1 rs2227667 (GA vs. AA) | 1.21          | 0.51-2.83  | 0.668 |
| SERPINE1 rs2227667 (GG vs. AA) | 1.43          | 0.43-4.72  | 0.558 |
| SERPINE1 rs2227692 (TC vs. CC) | 1.20          | 0.54-2.67  | 0.658 |
| SERPINE1 rs2227692 (TT vs. CC) | 1.88          | 0.37-9.52  | 0.444 |
| SERPINE1 rs7242 (GT vs. TT)    | 0.92          | 0.36-2.34  | 0.866 |
| SERPINE1 rs7242 (GG vs. TT)    | 0.72          | 0.25-2.05  | 0.536 |
| DKK1 rs11001553 (CT vs. CC)    | 1.03          | 0.40-2.63  | 0.958 |
| DKK1 rs2241529 (GA vs. AA)     | 0.87          | 0.40-1.92  | 0.732 |
| DKK1 rs2241529 (GG vs. AA)     | 0.91          | 0.22-3.82  | 0.896 |
| DKK1 rs1569198 (GA vs. AA)     | 1.01          | 0.47-2.20  | 0.976 |
| DKK1 rs1569198 (GG vs. AA)     | 0.61          | 0.05-7.05  | 0.690 |
| IFNG rs1861494 (TC vs. TT)     | 1.49          | 0.66-3.37  | 0.342 |
| IFNG rs1861494 (CC vs. TT)     | 0.44          | 0.12-1.58  | 0.207 |
| IFNG rs2430561 (TA vs. TT)     | 1.50          | 0.62-3.61  | 0.364 |
| IFNG rs2430561 (AA vs. TT)     | 0.00          | NA         | 1.000 |
| IFNG rs2069705 (AG vs. GG)     | 1.15          | 0.51-2.60  | 0.735 |
| IFNG rs2069705 (AA vs. GG)     | 2207815618.56 | NA         | 0.999 |
| HIF1A rs2301104 (GC vs. GG)    | 1.27          | 0.30-5.38  | 0.743 |
| HIF1A rs72714570 (GC vs. CC)   | 0.83          | 0.33-2.08  | 0.686 |
| HIF1A rs72714570 (GG vs. CC)   | 0.58          | 0.05-6.64  | 0.661 |
| HIF1A rs2301113 (CA vs. AA)    | 1.19          | 0.52-2.75  | 0.684 |
| HIF1A rs2301113 (CC vs. AA)    | 1.62          | 0.51-5.09  | 0.411 |
| HIF1A rs11549465 (TC vs. CC)   | 1.80          | 0.58-5.60  | 0.310 |
| HIF1A rs2057482 (CT vs. CC)    | 2.41          | 1.07-5.41  | 0.033 |
| HIF1A rs2057482 (TT vs. CC)    | 2.67          | 0.42-17.19 | 0.300 |

|                                |               |            |       |
|--------------------------------|---------------|------------|-------|
| CTNNB1 rs11564465 (TT vs. CC)  | 2.70          | 0.26-28.34 | 0.408 |
| CTNNB1 rs4135385 (AG vs. GG)   | 0.61          | 0.19-2.04  | 0.426 |
| CTNNB1 rs4135385 (AA vs. GG)   | 0.34          | 0.09-1.27  | 0.107 |
| CTNNB1 rs2293303 (CT vs. CC)   | 0.41          | 0.14-1.19  | 0.102 |
| CTNNB1 rs2293303 (TT vs. CC)   | 1225532639.40 | NA         | 0.999 |
| SERPINE1 rs2227631 (GA vs. GG) | 1.15          | 0.41-3.26  | 0.791 |
| SERPINE1 rs2227631 (AA vs. GG) | 1.59          | 0.46-5.50  | 0.461 |
| SERPINE1 rs6092 (GA vs. GG)    | 1.31          | 0.37-4.59  | 0.673 |
| SERPINE1 rs6092 (AA vs. GG)    | 0.00          | NA         | 1.000 |
| SERPINE1 rs6090 (AG vs. GG)    | 0.92          | 0.12-6.88  | 0.933 |
| SERPINE1 rs2227667 (GA vs. AA) | 0.26          | 0.08-0.80  | 0.019 |
| SERPINE1 rs2227667 (GG vs. AA) | 0.86          | 0.22-3.27  | 0.819 |
| SERPINE1 rs2227692 (TC vs. CC) | 0.25          | 0.09-0.71  | 0.010 |
| SERPINE1 rs2227692 (TT vs. CC) | 1.17          | 0.25-5.50  | 0.846 |
| SERPINE1 rs7242 (GT vs. TT)    | 0.95          | 0.32-2.86  | 0.931 |
| SERPINE1 rs7242 (GG vs. TT)    | 3.06          | 0.71-13.11 | 0.133 |
| DKK1 rs11001553 (CT vs. CC)    | 1.17          | 0.29-4.78  | 0.822 |
| DKK1 rs2241529 (GA vs. AA)     | 1.54          | 0.56-4.18  | 0.402 |
| DKK1 rs2241529 (GG vs. AA)     | 0.84          | 0.20-3.65  | 0.821 |
| DKK1 rs1569198 (GA vs. AA)     | 1.30          | 0.47-3.59  | 0.612 |
| DKK1 rs1569198 (GG vs. AA)     | 1.00          | 0.18-5.51  | 1.000 |
| IFNG rs1861494 (TC vs. TT)     | 0.62          | 0.23-1.72  | 0.360 |
| IFNG rs1861494 (CC vs. TT)     | 0.71          | 0.18-2.73  | 0.613 |
| IFNG rs2430561 (TA vs. TT)     | 0.47          | 0.15-1.47  | 0.192 |
| IFNG rs2430561 (AA vs. TT)     | -             | -          | -     |
| IFNG rs2069705 (AG vs. GG)     | 0.50          | 0.18-1.39  | 0.184 |
| IFNG rs2069705 (AA vs. GG)     | 0.00          | NA         | 1.000 |
| HIF1A rs2301104 (GC vs. GG)    | 0.91          | 0.24-3.45  | 0.889 |
| HIF1A rs72714570 (GC vs. CC)   | 0.78          | 0.29-2.10  | 0.624 |
| HIF1A rs72714570 (GG vs. CC)   | -             | -          | -     |
| HIF1A rs2301113 (CA vs. AA)    | 1.15          | 0.42-3.14  | 0.779 |
| HIF1A rs2301113 (CC vs. AA)    | 0.50          | 0.12-2.07  | 0.342 |
| HIF1A rs11549465 (TC vs. CC)   | 3.09          | 0.58-16.48 | 0.186 |
| HIF1A rs2057482 (CT vs. CC)    | 0.75          | 0.28-1.97  | 0.554 |
| HIF1A rs2057482 (TT vs. CC)    | 0.00          | NA         | 1.000 |

**Supplementary Table 3F** The association between each SNP and capsule formation stratified by tumor location

Single lobe

| SNP (genotype)                | OR            | 95%CI      | P value |
|-------------------------------|---------------|------------|---------|
| SLC2A1 rs841858 (GT vs. GG)   | 3.12          | 1.29-7.51  | 0.011   |
| SLC2A1 rs841858 (TT vs. GG)   | 4.45          | 0.44-44.78 | 0.205   |
| SLC2A1 rs3754219 (CA vs. AA)  | 1.16          | 0.50-2.69  | 0.725   |
| SLC2A1 rs3754219 (CC vs. AA)  | 1.00          | 0.31-3.21  | 1.000   |
| SLC2A1 rs841853 (CA vs. CC)   | 0.77          | 0.33-1.82  | 0.553   |
| SLC2A1 rs841853 (AA vs. CC)   | 0.71          | 0.15-3.40  | 0.670   |
| SLC2A1 rs841847 (TC vs. CC)   | 0.62          | 0.22-1.75  | 0.369   |
| SLC2A1 rs841847 (TT vs. CC)   | 1.47          | 0.23-9.21  | 0.683   |
| SLC2A1 rs7512565 (CT vs. CC)  | 0.54          | 0.25-1.20  | 0.131   |
| SLC2A1 rs7512565 (TT vs. CC)  | 0.41          | 0.04-4.71  | 0.473   |
| SLC2A1 rs2297977 (GT vs. GG)  | 2.87          | 1.18-6.99  | 0.021   |
| SLC2A1 rs2297977 (TT vs. GG)  | 1.79          | 0.44-7.23  | 0.413   |
| STAT1 rs3771300 (GT vs. TT)   | 1.66          | 0.73-3.77  | 0.228   |
| STAT1 rs3771300 (GG vs. TT)   | 1.28          | 0.42-3.89  | 0.663   |
| STAT1 rs1914408 (CT vs. CC)   | 2.40          | 1.05-5.47  | 0.037   |
| STAT1 rs1914408 (TT vs. CC)   | 0.53          | 0.15-1.91  | 0.334   |
| STAT1 rs2066804 (AG vs. GG)   | 1.84          | 0.77-4.43  | 0.173   |
| STAT1 rs2066804 (AA vs. GG)   | 0.76          | 0.28-2.07  | 0.597   |
| STAT1 rs1547550 (CG vs. GG)   | 1.52          | 0.58-3.97  | 0.389   |
| STAT1 rs1547550 (CC vs. GG)   | 1846256963.26 | NA         | 1.000   |
| STAT1 rs2280232 (CA vs. AA)   | 1.47          | 0.59-3.68  | 0.412   |
| STAT1 rs2280232 (CC vs. AA)   | 0.00          | NA         | 0.999   |
| STAT1 rs34997637 (GA vs. AA)  | 2.29          | 0.90-5.80  | 0.082   |
| STAT1 rs34997637 (GG vs. AA)  | 2.86          | 1.06-7.73  | 0.039   |
| STAT1 rs12693591 (CA vs. CC)  | 1.59          | 0.73-3.44  | 0.244   |
| STAT1 rs12693591 (AA vs. CC)  | 1.29          | 0.29-5.70  | 0.735   |
| STAT1 rs10173099 (TC vs. TT)  | 1.31          | 0.58-2.97  | 0.512   |
| STAT1 rs10173099 (CC vs. TT)  | 2.74          | 0.87-8.60  | 0.085   |
| STAT1 rs2066802 (AG vs. AA)   | 1.24          | 0.57-2.73  | 0.590   |
| STAT1 rs2066802 (GG vs. AA)   | 1.78          | 0.45-6.96  | 0.409   |
| STAT1 rs10208033 (TC vs. CC)  | 2.50          | 1.09-5.73  | 0.030   |
| STAT1 rs10208033 (TT vs. CC)  | 1.97          | 0.63-6.12  | 0.241   |
| STAT1 rs1467199 (GC vs. CC)   | 0.98          | 0.42-2.30  | 0.964   |
| STAT1 rs1467199 (GG vs. CC)   | 0.68          | 0.24-1.92  | 0.462   |
| CTNNB1 rs3864004 (GA vs. GG)  | 0.58          | 0.26-1.26  | 0.165   |
| CTNNB1 rs3864004 (AA vs. GG)  | 0.61          | 0.12-2.96  | 0.535   |
| CTNNB1 rs75288535 (GA vs. AA) | 0.54          | 0.23-1.26  | 0.153   |
| CTNNB1 rs75288535 (GG vs. AA) | 1.80          | 0.31-10.41 | 0.514   |
| CTNNB1 rs1798802 (GA vs. GG)  | 0.76          | 0.35-1.66  | 0.486   |
| CTNNB1 rs1798802 (AA vs. GG)  | 0.59          | 0.15-2.35  | 0.457   |
| CTNNB1 rs11564465 (TC vs. CC) | 0.68          | 0.31-1.49  | 0.330   |

Double lobes

| SNP (genotype)                | OR            | 95%CI      | P value |
|-------------------------------|---------------|------------|---------|
| SLC2A1 rs841858 (GT vs. GG)   | 1.02          | 0.31-3.42  | 0.972   |
| SLC2A1 rs841858 (TT vs. GG)   | -             | -          | -       |
| SLC2A1 rs3754219 (CA vs. AA)  | 0.72          | 0.24-2.14  | 0.551   |
| SLC2A1 rs3754219 (CC vs. AA)  | 0.51          | 0.13-2.03  | 0.335   |
| SLC2A1 rs841853 (CA vs. CC)   | 1.64          | 0.60-4.49  | 0.334   |
| SLC2A1 rs841853 (AA vs. CC)   | 0.69          | 0.06-8.26  | 0.773   |
| SLC2A1 rs841847 (TC vs. CC)   | 3.85          | 1.25-11.88 | 0.019   |
| SLC2A1 rs841847 (TT vs. CC)   | 2871955276.18 | NA         | 1.000   |
| SLC2A1 rs7512565 (CT vs. CC)  | 1.05          | 0.38-2.87  | 0.928   |
| SLC2A1 rs7512565 (TT vs. CC)  | 0.00          | NA         | 0.999   |
| SLC2A1 rs2297977 (GT vs. GG)  | 1.53          | 0.53-4.44  | 0.429   |
| SLC2A1 rs2297977 (TT vs. GG)  | 2230893830.60 | NA         | 1.000   |
| STAT1 rs3771300 (GT vs. TT)   | 1.19          | 0.45-3.15  | 0.730   |
| STAT1 rs3771300 (GG vs. TT)   | 0.30          | 0.03-2.93  | 0.299   |
| STAT1 rs1914408 (CT vs. CC)   | 1.91          | 0.69-5.26  | 0.214   |
| STAT1 rs1914408 (TT vs. CC)   | 4.42          | 0.75-26.10 | 0.101   |
| STAT1 rs2066804 (AG vs. GG)   | 0.68          | 0.23-2.04  | 0.496   |
| STAT1 rs2066804 (AA vs. GG)   | 1.00          | 0.28-3.63  | 1.000   |
| STAT1 rs1547550 (CG vs. GG)   | 2.48          | 0.65-9.42  | 0.183   |
| STAT1 rs1547550 (CC vs. GG)   | 2288589360.71 | NA         | 1.000   |
| STAT1 rs2280232 (CA vs. AA)   | 1.68          | 0.61-4.64  | 0.317   |
| STAT1 rs2280232 (CC vs. AA)   | -             | -          | -       |
| STAT1 rs34997637 (GA vs. AA)  | 1.26          | 0.40-3.98  | 0.697   |
| STAT1 rs34997637 (GG vs. AA)  | 2.02          | 0.51-7.94  | 0.314   |
| STAT1 rs12693591 (CA vs. CC)  | 0.75          | 0.28-2.00  | 0.566   |
| STAT1 rs12693591 (AA vs. CC)  | 0.33          | 0.03-3.50  | 0.360   |
| STAT1 rs10173099 (TC vs. TT)  | 1.33          | 0.48-3.69  | 0.586   |
| STAT1 rs10173099 (CC vs. TT)  | 1.42          | 0.34-6.00  | 0.636   |
| STAT1 rs2066802 (AG vs. AA)   | 0.95          | 0.36-2.49  | 0.914   |
| STAT1 rs2066802 (GG vs. AA)   | 1.17          | 0.07-20.02 | 0.915   |
| STAT1 rs10208033 (TC vs. CC)  | 1.13          | 0.41-3.06  | 0.818   |
| STAT1 rs10208033 (TT vs. CC)  | 1.29          | 0.27-6.07  | 0.751   |
| STAT1 rs1467199 (GC vs. CC)   | 1.06          | 0.32-3.45  | 0.930   |
| STAT1 rs1467199 (GG vs. CC)   | 0.78          | 0.22-2.79  | 0.701   |
| CTNNB1 rs3864004 (GA vs. GG)  | 1.01          | 0.37-2.80  | 0.981   |
| CTNNB1 rs3864004 (AA vs. GG)  | 2125624793.23 | NA         | 0.999   |
| CTNNB1 rs75288535 (GA vs. AA) | 0.48          | 0.13-1.77  | 0.271   |
| CTNNB1 rs75288535 (GG vs. AA) | 1.08          | 0.20-5.89  | 0.926   |
| CTNNB1 rs1798802 (GA vs. GG)  | 0.76          | 0.28-2.05  | 0.585   |
| CTNNB1 rs1798802 (AA vs. GG)  | 6.00          | 0.63-57.14 | 0.119   |
| CTNNB1 rs11564465 (TC vs. CC) | 1.76          | 0.65-4.79  | 0.268   |



|                                |               |            |       |
|--------------------------------|---------------|------------|-------|
| CTNNB1 rs11564465 (TT vs. CC)  | 1.37          | 0.22-8.74  | 0.738 |
| CTNNB1 rs4135385 (AG vs. GG)   | 1.10          | 0.45-2.72  | 0.831 |
| CTNNB1 rs4135385 (AA vs. GG)   | 0.44          | 0.15-1.24  | 0.121 |
| CTNNB1 rs2293303 (CT vs. CC)   | 0.73          | 0.27-1.97  | 0.532 |
| CTNNB1 rs2293303 (TT vs. CC)   | 1615474842.85 | NA         | 1.000 |
| SERPINE1 rs2227631 (GA vs. GG) | 0.71          | 0.32-1.61  | 0.418 |
| SERPINE1 rs2227631 (AA vs. GG) | 0.87          | 0.29-2.62  | 0.804 |
| SERPINE1 rs6092 (GA vs. GG)    | 0.70          | 0.25-2.00  | 0.504 |
| SERPINE1 rs6092 (AA vs. GG)    | 1615474842.85 | NA         | 1.000 |
| SERPINE1 rs6090 (AG vs. GG)    | 1.41          | 0.30-6.62  | 0.662 |
| SERPINE1 rs2227667 (GA vs. AA) | 0.71          | 0.31-1.62  | 0.410 |
| SERPINE1 rs2227667 (GG vs. AA) | 1.28          | 0.40-4.11  | 0.680 |
| SERPINE1 rs2227692 (TC vs. CC) | 0.72          | 0.33-1.56  | 0.401 |
| SERPINE1 rs2227692 (TT vs. CC) | 1.83          | 0.41-8.23  | 0.429 |
| SERPINE1 rs7242 (GT vs. TT)    | 0.65          | 0.26-1.62  | 0.355 |
| SERPINE1 rs7242 (GG vs. TT)    | 1.16          | 0.40-3.32  | 0.788 |
| DKK1 rs11001553 (CT vs. CC)    | 1.04          | 0.38-2.86  | 0.934 |
| DKK1 rs2241529 (GA vs. AA)     | 1.12          | 0.52-2.43  | 0.768 |
| DKK1 rs2241529 (GG vs. AA)     | 0.52          | 0.12-2.31  | 0.390 |
| DKK1 rs1569198 (GA vs. AA)     | 1.11          | 0.52-2.39  | 0.783 |
| DKK1 rs1569198 (GG vs. AA)     | 0.53          | 0.05-6.17  | 0.614 |
| IFNG rs1861494 (TC vs. TT)     | 1.24          | 0.56-2.79  | 0.596 |
| IFNG rs1861494 (CC vs. TT)     | 1.01          | 0.31-3.32  | 0.983 |
| IFNG rs2430561 (TA vs. TT)     | 0.44          | 0.18-1.07  | 0.070 |
| IFNG rs2430561 (AA vs. TT)     | 0.00          | NA         | 1.000 |
| IFNG rs2069705 (AG vs. GG)     | 0.36          | 0.16-0.82  | 0.015 |
| IFNG rs2069705 (AA vs. GG)     | 1251993003.21 | NA         | 0.999 |
| HIF1A rs2301104 (GC vs. GG)    | 0.49          | 0.14-1.73  | 0.268 |
| HIF1A rs72714570 (GC vs. CC)   | 0.54          | 0.23-1.29  | 0.164 |
| HIF1A rs72714570 (GG vs. CC)   | 0.88          | 0.05-14.62 | 0.931 |
| HIF1A rs2301113 (CA vs. AA)    | 0.93          | 0.41-2.08  | 0.857 |
| HIF1A rs2301113 (CC vs. AA)    | 1.00          | 0.32-3.16  | 1.000 |
| HIF1A rs11549465 (TC vs. CC)   | 1.70          | 0.56-5.15  | 0.348 |
| HIF1A rs2057482 (CT vs. CC)    | 1.70          | 0.78-3.71  | 0.182 |
| HIF1A rs2057482 (TT vs. CC)    | 1.28          | 0.17-9.61  | 0.813 |

|                                |               |            |       |
|--------------------------------|---------------|------------|-------|
| CTNNB1 rs11564465 (TT vs. CC)  | 2625146619.63 | NA         | 0.999 |
| CTNNB1 rs4135385 (AG vs. GG)   | 0.49          | 0.16-1.54  | 0.222 |
| CTNNB1 rs4135385 (AA vs. GG)   | 1.03          | 0.27-3.99  | 0.968 |
| CTNNB1 rs2293303 (CT vs. CC)   | 1.17          | 0.39-3.53  | 0.778 |
| CTNNB1 rs2293303 (TT vs. CC)   | 2129489565.58 | NA         | 0.999 |
| SERPINE1 rs2227631 (GA vs. GG) | 1.33          | 0.46-3.90  | 0.599 |
| SERPINE1 rs2227631 (AA vs. GG) | 1.04          | 0.30-3.58  | 0.954 |
| SERPINE1 rs6092 (GA vs. GG)    | 3.17          | 0.75-13.50 | 0.118 |
| SERPINE1 rs6092 (AA vs. GG)    | 0.00          | NA         | 1.000 |
| SERPINE1 rs6090 (AG vs. GG)    | 1.19          | 0.07-19.88 | 0.902 |
| SERPINE1 rs2227667 (GA vs. AA) | 0.62          | 0.20-1.89  | 0.400 |
| SERPINE1 rs2227667 (GG vs. AA) | 1.29          | 0.34-4.82  | 0.709 |
| SERPINE1 rs2227692 (TC vs. CC) | 0.56          | 0.20-1.57  | 0.272 |
| SERPINE1 rs2227692 (TT vs. CC) | 1.54          | 0.30-7.87  | 0.605 |
| SERPINE1 rs7242 (GT vs. TT)    | 1.66          | 0.52-5.29  | 0.388 |
| SERPINE1 rs7242 (GG vs. TT)    | 1.10          | 0.28-4.26  | 0.890 |
| DKK1 rs11001553 (CT vs. CC)    | 1.02          | 0.31-3.42  | 0.972 |
| DKK1 rs2241529 (GA vs. AA)     | 0.90          | 0.33-2.48  | 0.839 |
| DKK1 rs2241529 (GG vs. AA)     | 1.50          | 0.34-6.61  | 0.592 |
| DKK1 rs1569198 (GA vs. AA)     | 1.01          | 0.36-2.84  | 0.987 |
| DKK1 rs1569198 (GG vs. AA)     | 1.21          | 0.22-6.71  | 0.827 |
| IFNG rs1861494 (TC vs. TT)     | 0.81          | 0.29-2.32  | 0.701 |
| IFNG rs1861494 (CC vs. TT)     | 0.27          | 0.06-1.15  | 0.075 |
| IFNG rs2430561 (TA vs. TT)     | 4.05          | 1.13-14.57 | 0.032 |
| IFNG rs2430561 (AA vs. TT)     | -             | -          | -     |
| IFNG rs2069705 (AG vs. GG)     | 3.54          | 1.15-10.87 | 0.028 |
| IFNG rs2069705 (AA vs. GG)     | 0.00          | NA         | 1.000 |
| HIF1A rs2301104 (GC vs. GG)    | 6.85          | 0.76-62.06 | 0.087 |
| HIF1A rs72714570 (GC vs. CC)   | 1.65          | 0.56-4.86  | 0.366 |
| HIF1A rs72714570 (GG vs. CC)   | 0.00          | NA         | 1.000 |
| HIF1A rs2301113 (CA vs. AA)    | 1.52          | 0.54-4.28  | 0.431 |
| HIF1A rs2301113 (CC vs. AA)    | 1.01          | 0.26-3.96  | 0.986 |
| HIF1A rs11549465 (TC vs. CC)   | 3.33          | 0.60-18.51 | 0.169 |
| HIF1A rs2057482 (CT vs. CC)    | 1.15          | 0.42-3.14  | 0.791 |
| HIF1A rs2057482 (TT vs. CC)    | 1.25          | 0.07-21.26 | 0.877 |

**Supplementary Table 3G** The association between each SNP and capsule formation stratified by extrahepatic metastasis

No

Yes

| SNP (genotype)                | OR            | 95%CI      | P value |
|-------------------------------|---------------|------------|---------|
| SLC2A1 rs841858 (GT vs. GG)   | 2.16          | 1.01-4.62  | 0.048   |
| SLC2A1 rs841858 (TT vs. GG)   | 4.12          | 0.42-40.73 | 0.226   |
| SLC2A1 rs3754219 (CA vs. AA)  | 0.91          | 0.45-1.85  | 0.792   |
| SLC2A1 rs3754219 (CC vs. AA)  | 0.65          | 0.25-1.67  | 0.367   |
| SLC2A1 rs841853 (CA vs. CC)   | 1.08          | 0.54-2.14  | 0.836   |
| SLC2A1 rs841853 (AA vs. CC)   | 0.75          | 0.20-2.81  | 0.667   |
| SLC2A1 rs841847 (TC vs. CC)   | 1.51          | 0.70-3.27  | 0.295   |
| SLC2A1 rs841847 (TT vs. CC)   | 2.52          | 0.44-14.27 | 0.297   |
| SLC2A1 rs7512565 (CT vs. CC)  | 0.84          | 0.43-1.64  | 0.617   |
| SLC2A1 rs7512565 (TT vs. CC)  | 0.26          | 0.03-2.36  | 0.229   |
| SLC2A1 rs2297977 (GT vs. GG)  | 1.93          | 0.95-3.95  | 0.071   |
| SLC2A1 rs2297977 (TT vs. GG)  | 2.32          | 0.53-10.19 | 0.266   |
| STAT1 rs3771300 (GT vs. TT)   | 1.94          | 0.99-3.83  | 0.055   |
| STAT1 rs3771300 (GG vs. TT)   | 1.32          | 0.49-3.60  | 0.583   |
| STAT1 rs1914408 (CT vs. CC)   | 2.02          | 1.02-3.98  | 0.043   |
| STAT1 rs1914408 (TT vs. CC)   | 1.22          | 0.45-3.25  | 0.699   |
| STAT1 rs2066804 (AG vs. GG)   | 1.08          | 0.52-2.22  | 0.841   |
| STAT1 rs2066804 (AA vs. GG)   | 0.78          | 0.35-1.74  | 0.537   |
| STAT1 rs1547550 (CG vs. GG)   | 2.87          | 1.16-7.11  | 0.023   |
| STAT1 rs1547550 (CC vs. GG)   | 2182308121.05 | NA         | 0.999   |
| STAT1 rs2280232 (CA vs. AA)   | 1.35          | 0.66-2.76  | 0.409   |
| STAT1 rs2280232 (CC vs. AA)   | 0.00          | NA         | 0.999   |
| STAT1 rs34997637 (GA vs. AA)  | 1.53          | 0.71-3.26  | 0.276   |
| STAT1 rs34997637 (GG vs. AA)  | 2.65          | 1.14-6.15  | 0.024   |
| STAT1 rs12693591 (CA vs. CC)  | 1.06          | 0.56-2.03  | 0.856   |
| STAT1 rs12693591 (AA vs. CC)  | 0.81          | 0.24-2.75  | 0.730   |
| STAT1 rs10173099 (TC vs. TT)  | 1.30          | 0.66-2.56  | 0.445   |
| STAT1 rs10173099 (CC vs. TT)  | 2.93          | 1.10-7.77  | 0.031   |
| STAT1 rs2066802 (AG vs. AA)   | 1.03          | 0.54-1.98  | 0.923   |
| STAT1 rs2066802 (GG vs. AA)   | 1.65          | 0.48-5.59  | 0.425   |
| STAT1 rs10208033 (TC vs. CC)  | 1.97          | 1.00-3.90  | 0.051   |
| STAT1 rs10208033 (TT vs. CC)  | 1.96          | 0.76-5.00  | 0.162   |
| STAT1 rs1467199 (GC vs. CC)   | 0.91          | 0.44-1.89  | 0.794   |
| STAT1 rs1467199 (GG vs. CC)   | 0.65          | 0.28-1.51  | 0.318   |
| CTNNB1 rs3864004 (GA vs. GG)  | 0.77          | 0.40-1.49  | 0.439   |
| CTNNB1 rs3864004 (AA vs. GG)  | 2.14          | 0.50-9.09  | 0.303   |
| CTNNB1 rs75288535 (GA vs. AA) | 0.66          | 0.32-1.38  | 0.273   |
| CTNNB1 rs75288535 (GG vs. AA) | 1.25          | 0.36-4.33  | 0.730   |
| CTNNB1 rs1798802 (GA vs. GG)  | 0.86          | 0.44-1.65  | 0.639   |
| CTNNB1 rs1798802 (AA vs. GG)  | 1.67          | 0.54-5.14  | 0.374   |
| CTNNB1 rs11564465 (TC vs. CC) | 0.91          | 0.48-1.76  | 0.785   |

| SNP (genotype)                | OR           | 95%CI       | P value |
|-------------------------------|--------------|-------------|---------|
| SLC2A1 rs841858 (GT vs. GG)   | 1.94         | 0.32-11.76  | 0.469   |
| SLC2A1 rs841858 (TT vs. GG)   | -            | -           | -       |
| SLC2A1 rs3754219 (CA vs. AA)  | 1.60         | 0.24-10.81  | 0.630   |
| SLC2A1 rs3754219 (CC vs. AA)  | 2.67         | 0.16-45.14  | 0.497   |
| SLC2A1 rs841853 (CA vs. CC)   | 0.88         | 0.13-5.82   | 0.890   |
| SLC2A1 rs841853 (AA vs. CC)   | -            | -           | -       |
| SLC2A1 rs841847 (TC vs. CC)   | 0.89         | 0.10-7.86   | 0.916   |
| SLC2A1 rs841847 (TT vs. CC)   | -            | -           | -       |
| SLC2A1 rs7512565 (CT vs. CC)  | 0.16         | 0.02-1.07   | 0.059   |
| SLC2A1 rs7512565 (TT vs. CC)  | -            | -           | -       |
| SLC2A1 rs2297977 (GT vs. GG)  | 8.00         | 0.71-90.00  | 0.092   |
| SLC2A1 rs2297977 (TT vs. GG)  | 1.60         | 0.08-31.77  | 0.758   |
| STAT1 rs3771300 (GT vs. TT)   | 0.08         | 0.01-0.93   | 0.043   |
| STAT1 rs3771300 (GG vs. TT)   | 0.00         | NA          | 0.999   |
| STAT1 rs1914408 (CT vs. CC)   | 3.50         | 0.55-22.30  | 0.185   |
| STAT1 rs1914408 (TT vs. CC)   | 0.00         | NA          | 1.000   |
| STAT1 rs2066804 (AG vs. GG)   | 4.50         | 0.37-54.16  | 0.236   |
| STAT1 rs2066804 (AA vs. GG)   | 3.00         | 0.08-107.45 | 0.547   |
| STAT1 rs1547550 (CG vs. GG)   | 0.22         | 0.03-1.60   | 0.135   |
| STAT1 rs1547550 (CC vs. GG)   | -            | -           | -       |
| STAT1 rs2280232 (CA vs. AA)   | 4.57         | 0.41-51.14  | 0.217   |
| STAT1 rs2280232 (CC vs. AA)   | 0.00         | NA          | 1.000   |
| STAT1 rs34997637 (GA vs. AA)  | 6.00         | 0.46-77.75  | 0.170   |
| STAT1 rs34997637 (GG vs. AA)  | 2.00         | 0.11-35.81  | 0.638   |
| STAT1 rs12693591 (CA vs. CC)  | 2.63         | 0.45-15.31  | 0.283   |
| STAT1 rs12693591 (AA vs. CC)  | -            | -           | -       |
| STAT1 rs10173099 (TC vs. TT)  | 0.93         | 0.11-7.82   | 0.949   |
| STAT1 rs10173099 (CC vs. TT)  | 0.22         | 0.01-3.98   | 0.307   |
| STAT1 rs2066802 (AG vs. AA)   | 1.80         | 0.32-10.20  | 0.507   |
| STAT1 rs2066802 (GG vs. AA)   | -            | -           | -       |
| STAT1 rs10208033 (TC vs. CC)  | 0.88         | 0.14-5.58   | 0.888   |
| STAT1 rs10208033 (TT vs. CC)  | 0.00         | NA          | 1.000   |
| STAT1 rs1467199 (GC vs. CC)   | 2.10         | 0.25-17.59  | 0.494   |
| STAT1 rs1467199 (GG vs. CC)   | 1.50         | 0.11-21.31  | 0.765   |
| CTNNB1 rs3864004 (GA vs. GG)  | 0.46         | 0.08-2.76   | 0.394   |
| CTNNB1 rs3864004 (AA vs. GG)  | 0.00         | NA          | 1.000   |
| CTNNB1 rs75288535 (GA vs. AA) | 0.00         | NA          | 0.999   |
| CTNNB1 rs75288535 (GG vs. AA) | 969284905.71 | NA          | 1.000   |
| CTNNB1 rs1798802 (GA vs. GG)  | 0.24         | 0.03-1.71   | 0.153   |
| CTNNB1 rs1798802 (AA vs. GG)  | 0.00         | NA          | 1.000   |
| CTNNB1 rs11564465 (TC vs. CC) | 2.00         | 0.27-14.70  | 0.496   |

|                                |               |            |       |
|--------------------------------|---------------|------------|-------|
| CTNNB1 rs11564465 (TT vs. CC)  | 6.96          | 0.81-60.01 | 0.078 |
| CTNNB1 rs4135385 (AG vs. GG)   | 0.86          | 0.41-1.82  | 0.694 |
| CTNNB1 rs4135385 (AA vs. GG)   | 0.81          | 0.34-1.95  | 0.638 |
| CTNNB1 rs2293303 (CT vs. CC)   | 0.96          | 0.45-2.08  | 0.923 |
| CTNNB1 rs2293303 (TT vs. CC)   | 1866151973.64 | NA         | 0.999 |
| SERPINE1 rs2227631 (GA vs. GG) | 0.99          | 0.49-1.98  | 0.972 |
| SERPINE1 rs2227631 (AA vs. GG) | 0.98          | 0.41-2.31  | 0.958 |
| SERPINE1 rs6092 (GA vs. GG)    | 1.04          | 0.41-2.59  | 0.942 |
| SERPINE1 rs6092 (AA vs. GG)    | 1839155974.94 | NA         | 1.000 |
| SERPINE1 rs6090 (AG vs. GG)    | 1.52          | 0.33-7.01  | 0.593 |
| SERPINE1 rs2227667 (GA vs. AA) | 0.71          | 0.35-1.41  | 0.325 |
| SERPINE1 rs2227667 (GG vs. AA) | 0.93          | 0.36-2.37  | 0.877 |
| SERPINE1 rs2227692 (TC vs. CC) | 0.53          | 0.27-1.03  | 0.061 |
| SERPINE1 rs2227692 (TT vs. CC) | 1.24          | 0.40-3.90  | 0.710 |
| SERPINE1 rs7242 (GT vs. TT)    | 1.14          | 0.52-2.47  | 0.747 |
| SERPINE1 rs7242 (GG vs. TT)    | 1.35          | 0.57-3.20  | 0.492 |
| DKK1 rs11001553 (CT vs. CC)    | 0.89          | 0.40-2.00  | 0.777 |
| DKK1 rs2241529 (GA vs. AA)     | 1.12          | 0.58-2.16  | 0.733 |
| DKK1 rs2241529 (GG vs. AA)     | 0.81          | 0.28-2.36  | 0.694 |
| DKK1 rs1569198 (GA vs. AA)     | 1.19          | 0.62-2.28  | 0.600 |
| DKK1 rs1569198 (GG vs. AA)     | 0.95          | 0.24-3.78  | 0.945 |
| IFNG rs1861494 (TC vs. TT)     | 1.06          | 0.55-2.07  | 0.859 |
| IFNG rs1861494 (CC vs. TT)     | 0.57          | 0.21-1.52  | 0.258 |
| IFNG rs2430561 (TA vs. TT)     | 1.03          | 0.50-2.14  | 0.940 |
| IFNG rs2430561 (AA vs. TT)     | 0.00          | NA         | 1.000 |
| IFNG rs2069705 (AG vs. GG)     | 0.86          | 0.44-1.70  | 0.668 |
| IFNG rs2069705 (AA vs. GG)     | 3.29          | 0.33-32.68 | 0.309 |
| HIF1A rs2301104 (GC vs. GG)    | 0.84          | 0.28-2.53  | 0.753 |
| HIF1A rs72714570 (GC vs. CC)   | 0.75          | 0.36-1.57  | 0.448 |
| HIF1A rs72714570 (GG vs. CC)   | 0.52          | 0.05-5.85  | 0.594 |
| HIF1A rs2301113 (CA vs. AA)    | 1.02          | 0.52-2.01  | 0.959 |
| HIF1A rs2301113 (CC vs. AA)    | 1.06          | 0.43-2.61  | 0.905 |
| HIF1A rs11549465 (TC vs. CC)   | 2.12          | 0.79-5.71  | 0.136 |
| HIF1A rs2057482 (CT vs. CC)    | 1.51          | 0.79-2.88  | 0.217 |
| HIF1A rs2057482 (TT vs. CC)    | 1.32          | 0.25-6.87  | 0.744 |

|                                |               |             |       |
|--------------------------------|---------------|-------------|-------|
| CTNNB1 rs11564465 (TT vs. CC)  | 0.00          | NA          | 1.000 |
| CTNNB1 rs4135385 (AG vs. GG)   | 0.80          | 0.08-8.47   | 0.853 |
| CTNNB1 rs4135385 (AA vs. GG)   | 0.07          | 0.01-0.97   | 0.047 |
| CTNNB1 rs2293303 (CT vs. CC)   | 0.40          | 0.03-5.25   | 0.485 |
| CTNNB1 rs2293303 (TT vs. CC)   | -             | -           | -     |
| SERPINE1 rs2227631 (GA vs. GG) | 0.54          | 0.08-3.53   | 0.517 |
| SERPINE1 rs2227631 (AA vs. GG) | 0.71          | 0.04-14.35  | 0.826 |
| SERPINE1 rs6092 (GA vs. GG)    | 2.00          | 0.27-14.70  | 0.496 |
| SERPINE1 rs6092 (AA vs. GG)    | 0.00          | NA          | 1.000 |
| SERPINE1 rs6090 (AG vs. GG)    | 0.90          | 0.05-16.59  | 0.944 |
| SERPINE1 rs2227667 (GA vs. AA) | 0.50          | 0.02-10.25  | 0.653 |
| SERPINE1 rs2227667 (GG vs. AA) | 6.00          | 0.18-196.28 | 0.314 |
| SERPINE1 rs2227692 (TC vs. CC) | 3.50          | 0.47-25.90  | 0.220 |
| SERPINE1 rs2227692 (TT vs. CC) | 4038687107.13 | NA          | 0.999 |
| SERPINE1 rs7242 (GT vs. TT)    | 0.30          | 0.04-2.11   | 0.227 |
| SERPINE1 rs7242 (GG vs. TT)    | -             | -           | -     |
| DKK1 rs11001553 (CT vs. CC)    | 1794972047.61 | NA          | 0.999 |
| DKK1 rs2241529 (GA vs. AA)     | 0.64          | 0.10-4.10   | 0.640 |
| DKK1 rs2241529 (GG vs. AA)     | 1384692722.44 | NA          | 1.000 |
| DKK1 rs1569198 (GA vs. AA)     | 0.56          | 0.09-3.52   | 0.538 |
| DKK1 rs1569198 (GG vs. AA)     | -             | -           | -     |
| IFNG rs1861494 (TC vs. TT)     | 0.94          | 0.13-6.88   | 0.949 |
| IFNG rs1861494 (CC vs. TT)     | 0.50          | 0.05-5.15   | 0.560 |
| IFNG rs2430561 (TA vs. TT)     | 0.52          | 0.07-4.00   | 0.529 |
| IFNG rs2430561 (AA vs. TT)     | -             | -           | -     |
| IFNG rs2069705 (AG vs. GG)     | 0.56          | 0.09-3.52   | 0.538 |
| IFNG rs2069705 (AA vs. GG)     | -             | -           | -     |
| HIF1A rs2301104 (GC vs. GG)    | 3.38          | 0.29-39.32  | 0.332 |
| HIF1A rs72714570 (GC vs. CC)   | 1.25          | 0.22-7.08   | 0.801 |
| HIF1A rs72714570 (GG vs. CC)   | -             | -           | -     |
| HIF1A rs2301113 (CA vs. AA)    | 2.19          | 0.36-13.23  | 0.394 |
| HIF1A rs2301113 (CC vs. AA)    | 0.00          | NA          | 1.000 |
| HIF1A rs11549465 (TC vs. CC)   | 2.00          | 0.15-26.19  | 0.597 |
| HIF1A rs2057482 (CT vs. CC)    | 1.50          | 0.20-11.54  | 0.697 |
| HIF1A rs2057482 (TT vs. CC)    | -             | -           | -     |

**Supplementary Table 3H** The association between each SNP and capsule formation stratified by vascular invasion

No

Yes

| SNP (genotype)                | OR            | 95%CI      | <i>P</i> value | SNP (genotype)                | OR            | 95%CI      | <i>P</i> value |
|-------------------------------|---------------|------------|----------------|-------------------------------|---------------|------------|----------------|
| SLC2A1 rs841858 (GT vs. GG)   | 1.91          | 0.86-4.25  | 0.113          | SLC2A1 rs841858 (GT vs. GG)   | 2.89          | 0.69-12.07 | 0.147          |
| SLC2A1 rs841858 (TT vs. GG)   | 2.36          | 0.21-26.95 | 0.488          | SLC2A1 rs841858 (TT vs. GG)   | 3106682390.10 | NA         | 1.000          |
| SLC2A1 rs3754219 (CA vs. AA)  | 0.68          | 0.31-1.49  | 0.331          | SLC2A1 rs3754219 (CA vs. AA)  | 2.75          | 0.69-10.92 | 0.150          |
| SLC2A1 rs3754219 (CC vs. AA)  | 0.57          | 0.20-1.60  | 0.285          | SLC2A1 rs3754219 (CC vs. AA)  | 1.65          | 0.26-10.31 | 0.592          |
| SLC2A1 rs841853 (CA vs. CC)   | 1.42          | 0.65-3.12  | 0.378          | SLC2A1 rs841853 (CA vs. CC)   | 0.58          | 0.17-1.97  | 0.381          |
| SLC2A1 rs841853 (AA vs. CC)   | 1.07          | 0.25-4.53  | 0.929          | SLC2A1 rs841853 (AA vs. CC)   | 0.00          | NA         | 0.999          |
| SLC2A1 rs841847 (TC vs. CC)   | 1.26          | 0.53-2.99  | 0.597          | SLC2A1 rs841847 (TC vs. CC)   | 1.97          | 0.51-7.68  | 0.328          |
| SLC2A1 rs841847 (TT vs. CC)   | 4.33          | 0.47-40.05 | 0.197          | SLC2A1 rs841847 (TT vs. CC)   | 0.00          | NA         | 1.000          |
| SLC2A1 rs7512565 (CT vs. CC)  | 0.89          | 0.44-1.82  | 0.753          | SLC2A1 rs7512565 (CT vs. CC)  | 0.31          | 0.08-1.19  | 0.087          |
| SLC2A1 rs7512565 (TT vs. CC)  | 0.47          | 0.04-5.33  | 0.538          | SLC2A1 rs7512565 (TT vs. CC)  | 0.00          | NA         | 0.999          |
| SLC2A1 rs2297977 (GT vs. GG)  | 1.65          | 0.77-3.54  | 0.200          | SLC2A1 rs2297977 (GT vs. GG)  | 5.83          | 1.25-27.17 | 0.025          |
| SLC2A1 rs2297977 (TT vs. GG)  | 1.53          | 0.32-7.23  | 0.593          | SLC2A1 rs2297977 (TT vs. GG)  | 5.00          | 0.41-61.52 | 0.209          |
| STAT1 rs3771300 (GT vs. TT)   | 1.78          | 0.84-3.76  | 0.133          | STAT1 rs3771300 (GT vs. TT)   | 0.94          | 0.28-3.14  | 0.920          |
| STAT1 rs3771300 (GG vs. TT)   | 1.43          | 0.47-4.36  | 0.531          | STAT1 rs3771300 (GG vs. TT)   | 0.24          | 0.02-2.49  | 0.234          |
| STAT1 rs1914408 (CT vs. CC)   | 1.76          | 0.84-3.65  | 0.132          | STAT1 rs1914408 (CT vs. CC)   | 3.75          | 1.00-14.02 | 0.049          |
| STAT1 rs1914408 (TT vs. CC)   | 0.94          | 0.31-2.83  | 0.911          | STAT1 rs1914408 (TT vs. CC)   | 1.67          | 0.23-11.93 | 0.611          |
| STAT1 rs2066804 (AG vs. GG)   | 0.92          | 0.41-2.06  | 0.832          | STAT1 rs2066804 (AG vs. GG)   | 2.41          | 0.64-9.03  | 0.193          |
| STAT1 rs2066804 (AA vs. GG)   | 0.68          | 0.27-1.71  | 0.408          | STAT1 rs2066804 (AA vs. GG)   | 1.24          | 0.26-5.91  | 0.789          |
| STAT1 rs1547550 (CG vs. GG)   | 1.74          | 0.69-4.36  | 0.238          | STAT1 rs1547550 (CG vs. GG)   | 2.08          | 0.48-8.99  | 0.325          |
| STAT1 rs1547550 (CC vs. GG)   | 1805530706.72 | NA         | 0.999          | STAT1 rs1547550 (CC vs. GG)   | -             | -          | -              |
| STAT1 rs2280232 (CA vs. AA)   | 1.10          | 0.49-2.49  | 0.823          | STAT1 rs2280232 (CA vs. AA)   | 3.67          | 1.04-12.90 | 0.043          |
| STAT1 rs2280232 (CC vs. AA)   | 0.00          | NA         | 0.999          | STAT1 rs2280232 (CC vs. AA)   | 0.00          | NA         | 1.000          |
| STAT1 rs34997637 (GA vs. AA)  | 2.03          | 0.90-4.57  | 0.090          | STAT1 rs34997637 (GA vs. AA)  | 1.88          | 0.32-11.17 | 0.490          |
| STAT1 rs34997637 (GG vs. AA)  | 2.53          | 1.01-6.33  | 0.047          | STAT1 rs34997637 (GG vs. AA)  | 3.43          | 0.52-22.80 | 0.202          |
| STAT1 rs12693591 (CA vs. CC)  | 1.19          | 0.59-2.41  | 0.633          | STAT1 rs12693591 (CA vs. CC)  | 1.25          | 0.38-4.13  | 0.715          |
| STAT1 rs12693591 (AA vs. CC)  | 0.82          | 0.20-3.33  | 0.785          | STAT1 rs12693591 (AA vs. CC)  | 0.83          | 0.07-10.55 | 0.888          |
| STAT1 rs10173099 (TC vs. TT)  | 1.33          | 0.64-2.75  | 0.450          | STAT1 rs10173099 (TC vs. TT)  | 1.33          | 0.35-5.03  | 0.671          |
| STAT1 rs10173099 (CC vs. TT)  | 2.48          | 0.82-7.55  | 0.110          | STAT1 rs10173099 (CC vs. TT)  | 2.00          | 0.41-9.71  | 0.390          |
| STAT1 rs2066802 (AG vs. AA)   | 1.07          | 0.53-2.17  | 0.857          | STAT1 rs2066802 (AG vs. AA)   | 1.29          | 0.38-4.39  | 0.681          |
| STAT1 rs2066802 (GG vs. AA)   | 1.37          | 0.29-6.56  | 0.693          | STAT1 rs2066802 (GG vs. AA)   | 2.67          | 0.37-19.06 | 0.328          |
| STAT1 rs10208033 (TC vs. CC)  | 2.15          | 1.02-4.53  | 0.043          | STAT1 rs10208033 (TC vs. CC)  | 1.02          | 0.29-3.65  | 0.975          |
| STAT1 rs10208033 (TT vs. CC)  | 1.46          | 0.50-4.25  | 0.493          | STAT1 rs10208033 (TT vs. CC)  | 2.33          | 0.41-13.17 | 0.337          |
| STAT1 rs1467199 (GC vs. CC)   | 1.10          | 0.49-2.49  | 0.819          | STAT1 rs1467199 (GC vs. CC)   | 0.80          | 0.21-3.06  | 0.745          |
| STAT1 rs1467199 (GG vs. CC)   | 0.64          | 0.26-1.61  | 0.346          | STAT1 rs1467199 (GG vs. CC)   | 0.89          | 0.17-4.63  | 0.889          |
| CTNNB1 rs3864004 (GA vs. GG)  | 0.90          | 0.43-1.85  | 0.766          | CTNNB1 rs3864004 (GA vs. GG)  | 0.47          | 0.15-1.55  | 0.217          |
| CTNNB1 rs3864004 (AA vs. GG)  | 1.22          | 0.30-4.89  | 0.782          | CTNNB1 rs3864004 (AA vs. GG)  | 1750097746.42 | NA         | 1.000          |
| CTNNB1 rs75288535 (GA vs. AA) | 0.59          | 0.25-1.35  | 0.210          | CTNNB1 rs75288535 (GA vs. AA) | 0.47          | 0.12-1.79  | 0.266          |
| CTNNB1 rs75288535 (GG vs. AA) | 0.88          | 0.24-3.24  | 0.845          | CTNNB1 rs75288535 (GG vs. AA) | 2077039083.67 | NA         | 0.999          |
| CTNNB1 rs1798802 (GA vs. GG)  | 0.88          | 0.43-1.79  | 0.715          | CTNNB1 rs1798802 (GA vs. GG)  | 0.50          | 0.15-1.68  | 0.261          |
| CTNNB1 rs1798802 (AA vs. GG)  | 2.00          | 0.54-7.36  | 0.297          | CTNNB1 rs1798802 (AA vs. GG)  | 0.33          | 0.03-3.68  | 0.370          |
| CTNNB1 rs11564465 (TC vs. CC) | 1.07          | 0.52-2.20  | 0.855          | CTNNB1 rs11564465 (TC vs. CC) | 0.77          | 0.22-2.67  | 0.683          |

|                                |               |            |       |
|--------------------------------|---------------|------------|-------|
| CTNNB1 rs11564465 (TT vs. CC)  | 2.05          | 0.36-11.83 | 0.422 |
| CTNNB1 rs4135385 (AG vs. GG)   | 0.87          | 0.38-1.98  | 0.732 |
| CTNNB1 rs4135385 (AA vs. GG)   | 0.85          | 0.33-2.15  | 0.723 |
| CTNNB1 rs2293303 (CT vs. CC)   | 1.10          | 0.46-2.64  | 0.824 |
| CTNNB1 rs2293303 (TT vs. CC)   | 1645955500.26 | NA         | 0.999 |
| SERPINE1 rs2227631 (GA vs. GG) | 0.79          | 0.37-1.69  | 0.540 |
| SERPINE1 rs2227631 (AA vs. GG) | 0.84          | 0.32-2.20  | 0.723 |
| SERPINE1 rs6092 (GA vs. GG)    | 1.13          | 0.41-3.12  | 0.821 |
| SERPINE1 rs6092 (AA vs. GG)    | 1615474842.85 | NA         | 1.000 |
| SERPINE1 rs6090 (AG vs. GG)    | 1.33          | 0.29-6.20  | 0.714 |
| SERPINE1 rs2227667 (GA vs. AA) | 0.66          | 0.30-1.42  | 0.284 |
| SERPINE1 rs2227667 (GG vs. AA) | 1.45          | 0.50-4.17  | 0.496 |
| SERPINE1 rs2227692 (TC vs. CC) | 0.52          | 0.25-1.09  | 0.082 |
| SERPINE1 rs2227692 (TT vs. CC) | 3.41          | 0.67-17.41 | 0.140 |
| SERPINE1 rs7242 (GT vs. TT)    | 0.65          | 0.28-1.51  | 0.314 |
| SERPINE1 rs7242 (GG vs. TT)    | 1.17          | 0.45-3.03  | 0.751 |
| DKK1 rs11001553 (CT vs. CC)    | 0.88          | 0.38-2.04  | 0.763 |
| DKK1 rs2241529 (GA vs. AA)     | 0.73          | 0.36-1.51  | 0.400 |
| DKK1 rs2241529 (GG vs. AA)     | 0.61          | 0.19-1.97  | 0.405 |
| DKK1 rs1569198 (GA vs. AA)     | 0.81          | 0.40-1.65  | 0.560 |
| DKK1 rs1569198 (GG vs. AA)     | 0.44          | 0.08-2.54  | 0.356 |
| IFNG rs1861494 (TC vs. TT)     | 1.46          | 0.70-3.05  | 0.313 |
| IFNG rs1861494 (CC vs. TT)     | 0.63          | 0.22-1.83  | 0.392 |
| IFNG rs2430561 (TA vs. TT)     | 1.09          | 0.49-2.44  | 0.837 |
| IFNG rs2430561 (AA vs. TT)     | 0.00          | NA         | 1.000 |
| IFNG rs2069705 (AG vs. GG)     | 0.71          | 0.34-1.47  | 0.352 |
| IFNG rs2069705 (AA vs. GG)     | 2.67          | 0.27-26.72 | 0.402 |
| HIF1A rs2301104 (GC vs. GG)    | 1.55          | 0.42-5.77  | 0.513 |
| HIF1A rs72714570 (GC vs. CC)   | 0.74          | 0.33-1.63  | 0.450 |
| HIF1A rs72714570 (GG vs. CC)   | 0.44          | 0.04-5.04  | 0.511 |
| HIF1A rs2301113 (CA vs. AA)    | 1.03          | 0.49-2.17  | 0.933 |
| HIF1A rs2301113 (CC vs. AA)    | 1.00          | 0.35-2.82  | 1.000 |
| HIF1A rs11549465 (TC vs. CC)   | 2.45          | 0.87-6.91  | 0.089 |
| HIF1A rs2057482 (CT vs. CC)    | 2.01          | 0.98-4.12  | 0.058 |
| HIF1A rs2057482 (TT vs. CC)    | 1.94          | 0.31-12.28 | 0.481 |

|                                |               |            |       |
|--------------------------------|---------------|------------|-------|
| CTNNB1 rs11564465 (TT vs. CC)  | 2496642938.95 | NA         | 0.999 |
| CTNNB1 rs4135385 (AG vs. GG)   | 0.67          | 0.18-2.59  | 0.565 |
| CTNNB1 rs4135385 (AA vs. GG)   | 0.10          | 0.01-0.99  | 0.049 |
| CTNNB1 rs2293303 (CT vs. CC)   | 0.53          | 0.12-2.31  | 0.394 |
| CTNNB1 rs2293303 (TT vs. CC)   | 2261664779.99 | NA         | 1.000 |
| SERPINE1 rs2227631 (GA vs. GG) | 1.00          | 0.27-3.69  | 1.000 |
| SERPINE1 rs2227631 (AA vs. GG) | 0.90          | 0.18-4.64  | 0.900 |
| SERPINE1 rs6092 (GA vs. GG)    | 1.64          | 0.40-6.71  | 0.489 |
| SERPINE1 rs6092 (AA vs. GG)    | 0.00          | NA         | 1.000 |
| SERPINE1 rs6090 (AG vs. GG)    | 1.47          | 0.09-25.03 | 0.788 |
| SERPINE1 rs2227667 (GA vs. AA) | 0.71          | 0.18-2.78  | 0.624 |
| SERPINE1 rs2227667 (GG vs. AA) | 1.11          | 0.23-5.45  | 0.897 |
| SERPINE1 rs2227692 (TC vs. CC) | 1.15          | 0.34-3.90  | 0.818 |
| SERPINE1 rs2227692 (TT vs. CC) | 0.75          | 0.11-5.11  | 0.769 |
| SERPINE1 rs7242 (GT vs. TT)    | 2.42          | 0.60-9.82  | 0.215 |
| SERPINE1 rs7242 (GG vs. TT)    | 0.64          | 0.09-4.58  | 0.659 |
| DKK1 rs11001553 (CT vs. CC)    | 1.59          | 0.20-12.36 | 0.659 |
| DKK1 rs2241529 (GA vs. AA)     | 2.38          | 0.69-8.20  | 0.171 |
| DKK1 rs2241529 (GG vs. AA)     | 2.11          | 0.26-17.49 | 0.489 |
| DKK1 rs1569198 (GA vs. AA)     | 2.40          | 0.68-8.49  | 0.174 |
| DKK1 rs1569198 (GG vs. AA)     | 4.20          | 0.34-51.98 | 0.264 |
| IFNG rs1861494 (TC vs. TT)     | 0.42          | 0.11-1.54  | 0.187 |
| IFNG rs1861494 (CC vs. TT)     | 0.44          | 0.08-2.39  | 0.345 |
| IFNG rs2430561 (TA vs. TT)     | 0.66          | 0.17-2.57  | 0.545 |
| IFNG rs2430561 (AA vs. TT)     | -             | -          | -     |
| IFNG rs2069705 (AG vs. GG)     | 1.21          | 0.34-4.29  | 0.766 |
| IFNG rs2069705 (AA vs. GG)     | -             | -          | -     |
| HIF1A rs2301104 (GC vs. GG)    | 0.85          | 0.18-4.03  | 0.835 |
| HIF1A rs72714570 (GC vs. CC)   | 1.21          | 0.34-4.29  | 0.766 |
| HIF1A rs72714570 (GG vs. CC)   | -             | -          | -     |
| HIF1A rs2301113 (CA vs. AA)    | 1.33          | 0.38-4.62  | 0.654 |
| HIF1A rs2301113 (CC vs. AA)    | 0.98          | 0.18-5.24  | 0.976 |
| HIF1A rs11549465 (TC vs. CC)   | 0.71          | 0.06-8.41  | 0.786 |
| HIF1A rs2057482 (CT vs. CC)    | 0.48          | 0.13-1.85  | 0.285 |
| HIF1A rs2057482 (TT vs. CC)    | 0.00          | NA         | 1.000 |

**Supplementary Table 3I** The association between each SNP and capsule formation stratified by BCLC stage

BCLC 0

| SNP (genotype)                | OR            | 95%CI       | P value |
|-------------------------------|---------------|-------------|---------|
| SLC2A1 rs841858 (GT vs. GG)   | 7.50          | 0.72-78.37  | 0.092   |
| SLC2A1 rs841858 (TT vs. GG)   | 5.00          | 0.21-117.89 | 0.318   |
| SLC2A1 rs3754219 (CA vs. AA)  | 0.44          | 0.05-4.37   | 0.487   |
| SLC2A1 rs3754219 (CC vs. AA)  | 0.00          | NA          | 0.999   |
| SLC2A1 rs841853 (CA vs. CC)   | 0.00          | NA          | 0.999   |
| SLC2A1 rs841853 (AA vs. CC)   | 3230949685.70 | NA          | 1.000   |
| SLC2A1 rs841847 (TC vs. CC)   | 0.00          | NA          | 0.999   |
| SLC2A1 rs841847 (TT vs. CC)   | 3230949685.70 | NA          | 1.000   |
| SLC2A1 rs7512565 (CT vs. CC)  | 0.23          | 0.02-2.59   | 0.236   |
| SLC2A1 rs7512565 (TT vs. CC)  | -             | -           | -       |
| SLC2A1 rs2297977 (GT vs. GG)  | 3.67          | 0.17-77.55  | 0.404   |
| SLC2A1 rs2297977 (TT vs. GG)  | 7.33          | 0.48-111.19 | 0.151   |
| STAT1 rs3771300 (GT vs. TT)   | 2.50          | 0.12-50.44  | 0.550   |
| STAT1 rs3771300 (GG vs. TT)   | 1.25          | 0.09-17.98  | 0.870   |
| STAT1 rs1914408 (CT vs. CC)   | 0.17          | 0.01-1.94   | 0.152   |
| STAT1 rs1914408 (TT vs. CC)   | 0.00          | NA          | 0.999   |
| STAT1 rs2066804 (AG vs. GG)   | 0.27          | 0.02-3.02   | 0.286   |
| STAT1 rs2066804 (AA vs. GG)   | 0.11          | 0.01-1.78   | 0.120   |
| STAT1 rs1547550 (CG vs. GG)   | 5.50          | 0.61-49.54  | 0.128   |
| STAT1 rs1547550 (CC vs. GG)   | -             | -           | -       |
| STAT1 rs2280232 (CA vs. AA)   | 1.50          | 0.18-12.78  | 0.711   |
| STAT1 rs2280232 (CC vs. AA)   | 0.00          | NA          | 1.000   |
| STAT1 rs34997637 (GA vs. AA)  | 1615474808.61 | NA          | 0.999   |
| STAT1 rs34997637 (GG vs. AA)  | 1615474808.61 | NA          | 0.999   |
| STAT1 rs12693591 (CA vs. CC)  | 6.75          | 0.64-71.17  | 0.112   |
| STAT1 rs12693591 (AA vs. CC)  | 2.25          | 0.13-38.81  | 0.577   |
| STAT1 rs10173099 (TC vs. TT)  | 1.67          | 0.12-24.26  | 0.708   |
| STAT1 rs10173099 (CC vs. TT)  | 7.50          | 0.46-122.70 | 0.158   |
| STAT1 rs2066802 (AG vs. AA)   | 1.17          | 0.13-10.22  | 0.889   |
| STAT1 rs2066802 (GG vs. AA)   | 1.17          | 0.07-18.35  | 0.913   |
| STAT1 rs10208033 (TC vs. CC)  | 1346229059.24 | NA          | 0.999   |
| STAT1 rs10208033 (TT vs. CC)  | 1615474871.09 | NA          | 0.999   |
| STAT1 rs1467199 (GC vs. CC)   | 0.43          | 0.05-3.48   | 0.428   |
| STAT1 rs1467199 (GG vs. CC)   | 0.00          | NA          | 0.999   |
| CTNNB1 rs3864004 (GA vs. GG)  | 1.17          | 0.17-8.09   | 0.876   |
| CTNNB1 rs3864004 (AA vs. GG)  | -             | -           | -       |
| CTNNB1 rs75288535 (GA vs. AA) | 0.00          | NA          | 0.999   |
| CTNNB1 rs75288535 (GG vs. AA) | 0.00          | NA          | 1.000   |
| CTNNB1 rs1798802 (GA vs. GG)  | 0.86          | 0.12-5.94   | 0.876   |
| CTNNB1 rs1798802 (AA vs. GG)  | -             | -           | -       |
| CTNNB1 rs11564465 (TC vs. CC) | 1.60          | 0.23-11.27  | 0.637   |

BCLC A

| SNP (genotype)                | OR            | 95%CI      | P value |
|-------------------------------|---------------|------------|---------|
| SLC2A1 rs841858 (GT vs. GG)   | 1.31          | 0.31-5.53  | 0.711   |
| SLC2A1 rs841858 (TT vs. GG)   | -             | -          | -       |
| SLC2A1 rs3754219 (CA vs. AA)  | 0.79          | 0.19-3.29  | 0.741   |
| SLC2A1 rs3754219 (CC vs. AA)  | 3.57          | 0.31-40.75 | 0.305   |
| SLC2A1 rs841853 (CA vs. CC)   | 1.50          | 0.36-6.23  | 0.577   |
| SLC2A1 rs841853 (AA vs. CC)   | 0.00          | NA         | 0.999   |
| SLC2A1 rs841847 (TC vs. CC)   | 0.81          | 0.18-3.69  | 0.784   |
| SLC2A1 rs841847 (TT vs. CC)   | 0.65          | 0.04-11.45 | 0.767   |
| SLC2A1 rs7512565 (CT vs. CC)  | 0.78          | 0.20-3.01  | 0.716   |
| SLC2A1 rs7512565 (TT vs. CC)  | 1076983228.57 | NA         | 1.000   |
| SLC2A1 rs2297977 (GT vs. GG)  | 1.28          | 0.35-4.73  | 0.709   |
| SLC2A1 rs2297977 (TT vs. GG)  | 1242672956.04 | NA         | 1.000   |
| STAT1 rs3771300 (GT vs. TT)   | 4.13          | 0.97-17.63 | 0.056   |
| STAT1 rs3771300 (GG vs. TT)   | 4.13          | 0.36-47.30 | 0.255   |
| STAT1 rs1914408 (CT vs. CC)   | 2.89          | 0.66-12.57 | 0.157   |
| STAT1 rs1914408 (TT vs. CC)   | 0.44          | 0.06-3.11  | 0.414   |
| STAT1 rs2066804 (AG vs. GG)   | 1.96          | 0.38-9.93  | 0.414   |
| STAT1 rs2066804 (AA vs. GG)   | 0.51          | 0.10-2.59  | 0.416   |
| STAT1 rs1547550 (CG vs. GG)   | 6.56          | 0.72-59.85 | 0.095   |
| STAT1 rs1547550 (CC vs. GG)   | -             | -          | -       |
| STAT1 rs2280232 (CA vs. AA)   | 1.02          | 0.20-5.13  | 0.982   |
| STAT1 rs2280232 (CC vs. AA)   | 0.00          | NA         | 0.999   |
| STAT1 rs34997637 (GA vs. AA)  | 0.88          | 0.19-4.00  | 0.863   |
| STAT1 rs34997637 (GG vs. AA)  | 1.50          | 0.30-7.43  | 0.619   |
| STAT1 rs12693591 (CA vs. CC)  | 0.92          | 0.26-3.30  | 0.896   |
| STAT1 rs12693591 (AA vs. CC)  | -             | -          | -       |
| STAT1 rs10173099 (TC vs. TT)  | 1.16          | 0.30-4.40  | 0.831   |
| STAT1 rs10173099 (CC vs. TT)  | 1453927358.57 | NA         | 0.999   |
| STAT1 rs2066802 (AG vs. AA)   | 0.57          | 0.15-2.12  | 0.402   |
| STAT1 rs2066802 (GG vs. AA)   | 923128481.63  | NA         | 1.000   |
| STAT1 rs10208033 (TC vs. CC)  | 2.34          | 0.60-9.20  | 0.224   |
| STAT1 rs10208033 (TT vs. CC)  | 0.45          | 0.04-5.84  | 0.542   |
| STAT1 rs1467199 (GC vs. CC)   | 1.83          | 0.37-8.98  | 0.455   |
| STAT1 rs1467199 (GG vs. CC)   | 1.60          | 0.30-8.49  | 0.581   |
| CTNNB1 rs3864004 (GA vs. GG)  | 1.50          | 0.34-6.58  | 0.591   |
| CTNNB1 rs3864004 (AA vs. GG)  | 0.50          | 0.07-3.65  | 0.494   |
| CTNNB1 rs75288535 (GA vs. AA) | 2.02          | 0.43-9.46  | 0.371   |
| CTNNB1 rs75288535 (GG vs. AA) | 1400078197.14 | NA         | 1.000   |
| CTNNB1 rs1798802 (GA vs. GG)  | 1.60          | 0.38-6.82  | 0.525   |
| CTNNB1 rs1798802 (AA vs. GG)  | 1.19          | 0.20-6.99  | 0.851   |
| CTNNB1 rs11564465 (TC vs. CC) | 0.70          | 0.18-2.75  | 0.609   |

|                                |               |             |       |
|--------------------------------|---------------|-------------|-------|
| CTNNB1 rs11564465 (TT vs. CC)  | -             | -           | -     |
| CTNNB1 rs4135385 (AG vs. GG)   | 0.43          | 0.05-3.48   | 0.428 |
| CTNNB1 rs4135385 (AA vs. GG)   | 0.00          | NA          | 0.999 |
| CTNNB1 rs2293303 (CT vs. CC)   | 6.00          | 0.42-85.25  | 0.186 |
| CTNNB1 rs2293303 (TT vs. CC)   | -             | -           | -     |
| SERPINE1 rs2227631 (GA vs. GG) | 4.17          | 0.36-48.44  | 0.254 |
| SERPINE1 rs2227631 (AA vs. GG) | 0.00          | NA          | 0.999 |
| SERPINE1 rs6092 (GA vs. GG)    | 0.00          | NA          | 0.999 |
| SERPINE1 rs6092 (AA vs. GG)    | -             | -           | -     |
| SERPINE1 rs6090 (AG vs. GG)    | 0.00          | NA          | 1.000 |
| SERPINE1 rs2227667 (GA vs. AA) | 1384692664.66 | NA          | 0.999 |
| SERPINE1 rs2227667 (GG vs. AA) | 1.00          | NA          | 1.000 |
| SERPINE1 rs2227692 (TC vs. CC) | 3.13          | 0.28-35.16  | 0.356 |
| SERPINE1 rs2227692 (TT vs. CC) | -             | -           | -     |
| SERPINE1 rs7242 (GT vs. TT)    | 1346228976.87 | NA          | 0.999 |
| SERPINE1 rs7242 (GG vs. TT)    | 403868693.06  | NA          | 0.999 |
| DKK1 rs11001553 (CT vs. CC)    | 0.00          | NA          | 0.999 |
| DKK1 rs2241529 (GA vs. AA)     | 0.21          | 0.02-2.60   | 0.223 |
| DKK1 rs2241529 (GG vs. AA)     | 2692458071.42 | NA          | 0.999 |
| DKK1 rs1569198 (GA vs. AA)     | 1.07          | 0.13-8.79   | 0.952 |
| DKK1 rs1569198 (GG vs. AA)     | 4307932914.27 | NA          | 1.000 |
| IFNG rs1861494 (TC vs. TT)     | 0.28          | 0.03-3.20   | 0.305 |
| IFNG rs1861494 (CC vs. TT)     | 0.00          | NA          | 1.000 |
| IFNG rs2430561 (TA vs. TT)     | 5.00          | 0.55-45.39  | 0.153 |
| IFNG rs2430561 (AA vs. TT)     | 0.00          | NA          | 1.000 |
| IFNG rs2069705 (AG vs. GG)     | 3.33          | 0.32-34.83  | 0.315 |
| IFNG rs2069705 (AA vs. GG)     | 8077374214.26 | NA          | 0.999 |
| HIF1A rs2301104 (GC vs. GG)    | 3.00          | 0.15-59.89  | 0.472 |
| HIF1A rs72714570 (GC vs. CC)   | 6.00          | 0.42-85.25  | 0.186 |
| HIF1A rs72714570 (GG vs. CC)   | -             | -           | -     |
| HIF1A rs2301113 (CA vs. AA)    | 2.00          | 0.16-24.33  | 0.587 |
| HIF1A rs2301113 (CC vs. AA)    | 4.00          | 0.12-136.96 | 0.442 |
| HIF1A rs11549465 (TC vs. CC)   | 1.67          | 0.20-14.05  | 0.639 |
| HIF1A rs2057482 (CT vs. CC)    | 2.00          | 0.26-15.38  | 0.505 |
| HIF1A rs2057482 (TT vs. CC)    | 0.00          | NA          | 1.000 |

|                                |               |            |       |
|--------------------------------|---------------|------------|-------|
| CTNNB1 rs11564465 (TT vs. CC)  | 1.20          | 0.10-15.20 | 0.888 |
| CTNNB1 rs4135385 (AG vs. GG)   | 2.14          | 0.43-10.74 | 0.354 |
| CTNNB1 rs4135385 (AA vs. GG)   | 2.19          | 0.36-13.23 | 0.394 |
| CTNNB1 rs2293303 (CT vs. CC)   | 1.20          | 0.24-5.96  | 0.820 |
| CTNNB1 rs2293303 (TT vs. CC)   | 1166731830.95 | NA         | 1.000 |
| SERPINE1 rs2227631 (GA vs. GG) | 0.27          | 0.05-1.57  | 0.146 |
| SERPINE1 rs2227631 (AA vs. GG) | 0.33          | 0.04-2.87  | 0.318 |
| SERPINE1 rs6092 (GA vs. GG)    | 3.16          | 0.32-31.29 | 0.326 |
| SERPINE1 rs6092 (AA vs. GG)    | 1275374875.94 | NA         | 1.000 |
| SERPINE1 rs6090 (AG vs. GG)    | 1292379874.28 | NA         | 0.999 |
| SERPINE1 rs2227667 (GA vs. AA) | 1.08          | 0.28-4.21  | 0.908 |
| SERPINE1 rs2227667 (GG vs. AA) | 0.67          | 0.07-6.11  | 0.720 |
| SERPINE1 rs2227692 (TC vs. CC) | 0.50          | 0.13-1.92  | 0.313 |
| SERPINE1 rs2227692 (TT vs. CC) | 1.00          | 0.08-13.37 | 1.000 |
| SERPINE1 rs7242 (GT vs. TT)    | 0.44          | 0.07-2.89  | 0.396 |
| SERPINE1 rs7242 (GG vs. TT)    | 0.64          | 0.09-4.66  | 0.659 |
| DKK1 rs11001553 (CT vs. CC)    | 0.73          | 0.18-2.99  | 0.665 |
| DKK1 rs2241529 (GA vs. AA)     | 1.10          | 0.26-4.65  | 0.897 |
| DKK1 rs2241529 (GG vs. AA)     | 0.00          | NA         | 0.999 |
| DKK1 rs1569198 (GA vs. AA)     | 0.58          | 0.15-2.32  | 0.445 |
| DKK1 rs1569198 (GG vs. AA)     | 0.00          | NA         | 0.999 |
| IFNG rs1861494 (TC vs. TT)     | 2.31          | 0.57-9.41  | 0.242 |
| IFNG rs1861494 (CC vs. TT)     | 0.59          | 0.08-4.50  | 0.613 |
| IFNG rs2430561 (TA vs. TT)     | 0.38          | 0.09-1.54  | 0.174 |
| IFNG rs2430561 (AA vs. TT)     | -             | -          | -     |
| IFNG rs2069705 (AG vs. GG)     | 0.41          | 0.11-1.54  | 0.187 |
| IFNG rs2069705 (AA vs. GG)     | -             | -          | -     |
| HIF1A rs2301104 (GC vs. GG)    | 1230837975.51 | NA         | 0.999 |
| HIF1A rs72714570 (GC vs. CC)   | 0.96          | 0.24-3.83  | 0.957 |
| HIF1A rs72714570 (GG vs. CC)   | 1110638954.46 | NA         | 1.000 |
| HIF1A rs2301113 (CA vs. AA)    | 1.75          | 0.40-7.66  | 0.458 |
| HIF1A rs2301113 (CC vs. AA)    | 1.09          | 0.21-5.76  | 0.916 |
| HIF1A rs11549465 (TC vs. CC)   | 0.70          | 0.09-5.58  | 0.736 |
| HIF1A rs2057482 (CT vs. CC)    | 2.52          | 0.62-10.29 | 0.198 |
| HIF1A rs2057482 (TT vs. CC)    | 0.92          | 0.05-16.49 | 0.953 |

**BCLC B**

| SNP (genotype)               | OR            | 95%CI      | P value |
|------------------------------|---------------|------------|---------|
| SLC2A1 rs841858 (GT vs. GG)  | 2.11          | 0.59-7.47  | 0.249   |
| SLC2A1 rs841858 (TT vs. GG)  | 2125624793.23 | NA         | 1.000   |
| SLC2A1 rs3754219 (CA vs. AA) | 1.05          | 0.32-3.44  | 0.936   |
| SLC2A1 rs3754219 (CC vs. AA) | 0.30          | 0.06-1.47  | 0.137   |
| SLC2A1 rs841853 (CA vs. CC)  | 1.43          | 0.41-5.01  | 0.580   |
| SLC2A1 rs841853 (AA vs. CC)  | 1.83          | 0.28-12.19 | 0.531   |
| SLC2A1 rs841847 (TC vs. CC)  | 3.32          | 0.76-14.48 | 0.111   |

**BCLC C**

| SNP (genotype)               | OR            | 95%CI     | P value |
|------------------------------|---------------|-----------|---------|
| SLC2A1 rs841858 (GT vs. GG)  | 2.40          | 0.69-8.40 | 0.171   |
| SLC2A1 rs841858 (TT vs. GG)  | 2423212264.28 | NA        | 1.000   |
| SLC2A1 rs3754219 (CA vs. AA) | 1.22          | 0.39-3.79 | 0.728   |
| SLC2A1 rs3754219 (CC vs. AA) | 1.15          | 0.26-5.12 | 0.858   |
| SLC2A1 rs841853 (CA vs. CC)  | 0.75          | 0.27-2.13 | 0.593   |
| SLC2A1 rs841853 (AA vs. CC)  | 0.00          | NA        | 0.999   |
| SLC2A1 rs841847 (TC vs. CC)  | 1.47          | 0.46-4.71 | 0.517   |

|                                |               |            |       |
|--------------------------------|---------------|------------|-------|
| SLC2A1 rs841847 (TT vs. CC)    | 2295674776.68 | NA         | 0.999 |
| SLC2A1 rs7512565 (CT vs. CC)   | 1.62          | 0.53-4.94  | 0.399 |
| SLC2A1 rs7512565 (TT vs. CC)   | 0.00          | NA         | 0.999 |
| SLC2A1 rs2297977 (GT vs. GG)   | 1.50          | 0.47-4.84  | 0.497 |
| SLC2A1 rs2297977 (TT vs. GG)   | 0.58          | 0.05-6.98  | 0.670 |
| STAT1 rs3771300 (GT vs. TT)    | 1.60          | 0.51-4.99  | 0.420 |
| STAT1 rs3771300 (GG vs. TT)    | 1.31          | 0.27-6.24  | 0.737 |
| STAT1 rs1914408 (CT vs. CC)    | 1.80          | 0.59-5.48  | 0.300 |
| STAT1 rs1914408 (TT vs. CC)    | 3.00          | 0.47-19.04 | 0.244 |
| STAT1 rs2066804 (AG vs. GG)    | 0.89          | 0.27-2.89  | 0.845 |
| STAT1 rs2066804 (AA vs. GG)    | 1.56          | 0.36-6.69  | 0.553 |
| STAT1 rs1547550 (CG vs. GG)    | 0.75          | 0.12-4.88  | 0.763 |
| STAT1 rs1547550 (CC vs. GG)    | 1817409198.21 | NA         | 0.999 |
| STAT1 rs2280232 (CA vs. AA)    | 0.71          | 0.20-2.58  | 0.608 |
| STAT1 rs2280232 (CC vs. AA)    | -             | -          | -     |
| STAT1 rs34997637 (GA vs. AA)   | 1.97          | 0.57-6.88  | 0.286 |
| STAT1 rs34997637 (GG vs. AA)   | 2.44          | 0.57-10.45 | 0.228 |
| STAT1 rs12693591 (CA vs. CC)   | 0.98          | 0.33-2.94  | 0.974 |
| STAT1 rs12693591 (AA vs. CC)   | 1.07          | 0.19-6.22  | 0.939 |
| STAT1 rs10173099 (TC vs. TT)   | 1.61          | 0.53-4.93  | 0.403 |
| STAT1 rs10173099 (CC vs. TT)   | 1.36          | 0.28-6.68  | 0.702 |
| STAT1 rs2066802 (AG vs. AA)    | 1.54          | 0.52-4.60  | 0.436 |
| STAT1 rs2066802 (GG vs. AA)    | 1.29          | 0.16-10.30 | 0.813 |
| STAT1 rs10208033 (TC vs. CC)   | 2.37          | 0.72-7.78  | 0.155 |
| STAT1 rs10208033 (TT vs. CC)   | 2.49          | 0.61-10.18 | 0.205 |
| STAT1 rs1467199 (GC vs. CC)    | 1.17          | 0.35-3.97  | 0.801 |
| STAT1 rs1467199 (GG vs. CC)    | 0.41          | 0.10-1.64  | 0.207 |
| CTNNB1 rs3864004 (GA vs. GG)   | 0.71          | 0.23-2.15  | 0.540 |
| CTNNB1 rs3864004 (AA vs. GG)   | 1710502774.78 | NA         | 0.999 |
| CTNNB1 rs75288535 (GA vs. AA)  | 0.88          | 0.23-3.36  | 0.848 |
| CTNNB1 rs75288535 (GG vs. AA)  | 0.79          | 0.16-4.00  | 0.775 |
| CTNNB1 rs1798802 (GA vs. GG)   | 0.71          | 0.24-2.11  | 0.542 |
| CTNNB1 rs1798802 (AA vs. GG)   | 1730865903.06 | NA         | 0.999 |
| CTNNB1 rs11564465 (TC vs. CC)  | 1.46          | 0.48-4.43  | 0.506 |
| CTNNB1 rs11564465 (TT vs. CC)  | 2120310731.24 | NA         | 0.999 |
| CTNNB1 rs4135385 (AG vs. GG)   | 0.56          | 0.16-1.92  | 0.352 |
| CTNNB1 rs4135385 (AA vs. GG)   | 1.19          | 0.29-4.92  | 0.815 |
| CTNNB1 rs2293303 (CT vs. CC)   | 0.91          | 0.24-3.40  | 0.887 |
| CTNNB1 rs2293303 (TT vs. CC)   | 1762336192.20 | NA         | 1.000 |
| SERPINE1 rs2227631 (GA vs. GG) | 0.75          | 0.23-2.50  | 0.639 |
| SERPINE1 rs2227631 (AA vs. GG) | 1.14          | 0.31-4.25  | 0.842 |
| SERPINE1 rs6092 (GA vs. GG)    | 1.08          | 0.20-5.85  | 0.929 |
| SERPINE1 rs6092 (AA vs. GG)    | -             | -          | -     |
| SERPINE1 rs6090 (AG vs. GG)    | 0.00          | NA         | 1.000 |

|                                |               |            |       |
|--------------------------------|---------------|------------|-------|
| SLC2A1 rs841847 (TT vs. CC)    | 0.00          | NA         | 1.000 |
| SLC2A1 rs7512565 (CT vs. CC)   | 0.46          | 0.16-1.33  | 0.149 |
| SLC2A1 rs7512565 (TT vs. CC)   | 0.00          | NA         | 0.999 |
| SLC2A1 rs2297977 (GT vs. GG)   | 3.07          | 0.88-10.68 | 0.078 |
| SLC2A1 rs2297977 (TT vs. GG)   | 3.41          | 0.29-40.50 | 0.331 |
| STAT1 rs3771300 (GT vs. TT)    | 0.50          | 0.18-1.42  | 0.194 |
| STAT1 rs3771300 (GG vs. TT)    | 0.15          | 0.02-1.46  | 0.102 |
| STAT1 rs1914408 (CT vs. CC)    | 4.36          | 1.38-13.84 | 0.012 |
| STAT1 rs1914408 (TT vs. CC)    | 1.64          | 0.31-8.59  | 0.561 |
| STAT1 rs2066804 (AG vs. GG)    | 1.88          | 0.60-5.83  | 0.277 |
| STAT1 rs2066804 (AA vs. GG)    | 1.50          | 0.37-6.05  | 0.569 |
| STAT1 rs1547550 (CG vs. GG)    | 1.04          | 0.31-3.54  | 0.946 |
| STAT1 rs1547550 (CC vs. GG)    | -             | -          | -     |
| STAT1 rs2280232 (CA vs. AA)    | 3.60          | 1.19-10.87 | 0.023 |
| STAT1 rs2280232 (CC vs. AA)    | 0.00          | NA         | 1.000 |
| STAT1 rs34997637 (GA vs. AA)   | 2.25          | 0.51-9.91  | 0.285 |
| STAT1 rs34997637 (GG vs. AA)   | 3.33          | 0.66-16.85 | 0.145 |
| STAT1 rs12693591 (CA vs. CC)   | 1.18          | 0.42-3.27  | 0.755 |
| STAT1 rs12693591 (AA vs. CC)   | 0.67          | 0.05-8.24  | 0.752 |
| STAT1 rs10173099 (TC vs. TT)   | 1.64          | 0.54-5.02  | 0.386 |
| STAT1 rs10173099 (CC vs. TT)   | 1.75          | 0.39-7.95  | 0.469 |
| STAT1 rs2066802 (AG vs. AA)    | 1.43          | 0.51-4.00  | 0.497 |
| STAT1 rs2066802 (GG vs. AA)    | 4.62          | 0.43-49.30 | 0.206 |
| STAT1 rs10208033 (TC vs. CC)   | 1.31          | 0.45-3.84  | 0.620 |
| STAT1 rs10208033 (TT vs. CC)   | 1.50          | 0.30-7.43  | 0.619 |
| STAT1 rs1467199 (GC vs. CC)    | 0.94          | 0.29-3.03  | 0.914 |
| STAT1 rs1467199 (GG vs. CC)    | 0.70          | 0.16-3.05  | 0.638 |
| CTNNB1 rs3864004 (GA vs. GG)   | 0.44          | 0.16-1.23  | 0.116 |
| CTNNB1 rs3864004 (AA vs. GG)   | 0.83          | 0.05-14.48 | 0.900 |
| CTNNB1 rs75288535 (GA vs. AA)  | 0.27          | 0.08-0.96  | 0.044 |
| CTNNB1 rs75288535 (GG vs. AA)  | 1542044168.18 | NA         | 0.999 |
| CTNNB1 rs1798802 (GA vs. GG)   | 0.47          | 0.17-1.34  | 0.159 |
| CTNNB1 rs1798802 (AA vs. GG)   | 0.19          | 0.02-1.90  | 0.157 |
| CTNNB1 rs11564465 (TC vs. CC)  | 0.79          | 0.28-2.24  | 0.660 |
| CTNNB1 rs11564465 (TT vs. CC)  | 2.38          | 0.20-28.67 | 0.496 |
| CTNNB1 rs4135385 (AG vs. GG)   | 0.60          | 0.17-2.07  | 0.419 |
| CTNNB1 rs4135385 (AA vs. GG)   | 0.13          | 0.03-0.64  | 0.012 |
| CTNNB1 rs2293303 (CT vs. CC)   | 0.44          | 0.12-1.58  | 0.206 |
| CTNNB1 rs2293303 (TT vs. CC)   | 1755950916.14 | NA         | 1.000 |
| SERPINE1 rs2227631 (GA vs. GG) | 1.17          | 0.39-3.53  | 0.782 |
| SERPINE1 rs2227631 (AA vs. GG) | 0.86          | 0.20-3.64  | 0.834 |
| SERPINE1 rs6092 (GA vs. GG)    | 1.56          | 0.46-5.31  | 0.481 |
| SERPINE1 rs6092 (AA vs. GG)    | 0.00          | NA         | 1.000 |
| SERPINE1 rs6090 (AG vs. GG)    | 1.22          | 0.16-9.26  | 0.846 |



|                                |               |            |       |
|--------------------------------|---------------|------------|-------|
| SERPINE1 rs2227667 (GA vs. AA) | 0.24          | 0.07-0.83  | 0.024 |
| SERPINE1 rs2227667 (GG vs. AA) | 1.23          | 0.28-5.45  | 0.785 |
| SERPINE1 rs2227692 (TC vs. CC) | 0.21          | 0.06-0.68  | 0.009 |
| SERPINE1 rs2227692 (TT vs. CC) | 2.50          | 0.24-25.72 | 0.441 |
| SERPINE1 rs7242 (GT vs. TT)    | 0.47          | 0.14-1.64  | 0.237 |
| SERPINE1 rs7242 (GG vs. TT)    | 2.75          | 0.63-11.97 | 0.178 |
| DKK1 rs11001553 (CT vs. CC)    | 0.83          | 0.20-3.48  | 0.803 |
| DKK1 rs2241529 (GA vs. AA)     | 1.02          | 0.35-3.01  | 0.967 |
| DKK1 rs2241529 (GG vs. AA)     | 1.09          | 0.13-9.12  | 0.936 |
| DKK1 rs1569198 (GA vs. AA)     | 1.24          | 0.42-3.62  | 0.698 |
| DKK1 rs1569198 (GG vs. AA)     | 0.57          | 0.05-6.90  | 0.656 |
| IFNG rs1861494 (TC vs. TT)     | 0.93          | 0.30-2.92  | 0.906 |
| IFNG rs1861494 (CC vs. TT)     | 0.80          | 0.17-3.89  | 0.782 |
| IFNG rs2430561 (TA vs. TT)     | 1.86          | 0.46-7.45  | 0.383 |
| IFNG rs2430561 (AA vs. TT)     | -             | -          | -     |
| IFNG rs2069705 (AG vs. GG)     | 0.57          | 0.18-1.87  | 0.354 |
| IFNG rs2069705 (AA vs. GG)     | 1538547469.38 | NA         | 1.000 |
| HIF1A rs2301104 (GC vs. GG)    | 0.33          | 0.03-3.41  | 0.354 |
| HIF1A rs72714570 (GC vs. CC)   | 0.20          | 0.04-1.05  | 0.058 |
| HIF1A rs72714570 (GG vs. CC)   | 0.00          | NA         | 1.000 |
| HIF1A rs2301113 (CA vs. AA)    | 0.79          | 0.26-2.37  | 0.668 |
| HIF1A rs2301113 (CC vs. AA)    | 1.33          | 0.25-7.17  | 0.738 |
| HIF1A rs11549465 (TC vs. CC)   | 2423212264.28 | NA         | 0.999 |
| HIF1A rs2057482 (CT vs. CC)    | 2.72          | 0.91-8.16  | 0.074 |
| HIF1A rs2057482 (TT vs. CC)    | 2827080974.99 | NA         | 0.999 |

|                                |      |            |       |
|--------------------------------|------|------------|-------|
| SERPINE1 rs2227667 (GA vs. AA) | 0.77 | 0.23-2.61  | 0.677 |
| SERPINE1 rs2227667 (GG vs. AA) | 1.93 | 0.46-8.05  | 0.368 |
| SERPINE1 rs2227692 (TC vs. CC) | 1.60 | 0.55-4.65  | 0.388 |
| SERPINE1 rs2227692 (TT vs. CC) | 1.60 | 0.33-7.89  | 0.564 |
| SERPINE1 rs7242 (GT vs. TT)    | 1.41 | 0.45-4.43  | 0.561 |
| SERPINE1 rs7242 (GG vs. TT)    | 0.42 | 0.08-2.07  | 0.285 |
| DKK1 rs11001553 (CT vs. CC)    | 1.78 | 0.36-8.70  | 0.478 |
| DKK1 rs2241529 (GA vs. AA)     | 1.43 | 0.50-4.09  | 0.506 |
| DKK1 rs2241529 (GG vs. AA)     | 1.43 | 0.25-8.14  | 0.688 |
| DKK1 rs1569198 (GA vs. AA)     | 1.26 | 0.45-3.57  | 0.663 |
| DKK1 rs1569198 (GG vs. AA)     | 2.75 | 0.23-33.01 | 0.425 |
| IFNG rs1861494 (TC vs. TT)     | 0.95 | 0.31-2.85  | 0.921 |
| IFNG rs1861494 (CC vs. TT)     | 0.55 | 0.13-2.33  | 0.413 |
| IFNG rs2430561 (TA vs. TT)     | 0.65 | 0.20-2.08  | 0.470 |
| IFNG rs2430561 (AA vs. TT)     | -    | -          | -     |
| IFNG rs2069705 (AG vs. GG)     | 1.16 | 0.40-3.34  | 0.781 |
| IFNG rs2069705 (AA vs. GG)     | 0.00 | NA         | 1.000 |
| HIF1A rs2301104 (GC vs. GG)    | 1.25 | 0.32-4.83  | 0.746 |
| HIF1A rs72714570 (GC vs. CC)   | 1.16 | 0.40-3.34  | 0.781 |
| HIF1A rs72714570 (GG vs. CC)   | 0.00 | NA         | 1.000 |
| HIF1A rs2301113 (CA vs. AA)    | 1.36 | 0.47-3.99  | 0.571 |
| HIF1A rs2301113 (CC vs. AA)    | 0.55 | 0.11-2.61  | 0.448 |
| HIF1A rs11549465 (TC vs. CC)   | 0.79 | 0.12-5.08  | 0.804 |
| HIF1A rs2057482 (CT vs. CC)    | 0.46 | 0.14-1.52  | 0.200 |
| HIF1A rs2057482 (TT vs. CC)    | 0.00 | NA         | 1.000 |

**Supplementary Table 4** Survival analysis

Capsule group

| SNP (genotype)                  | median OS 1<br>(months) | median OS 2<br>(months) | <i>P</i><br>value |
|---------------------------------|-------------------------|-------------------------|-------------------|
| SLC2A1 rs841858 (TT+GT vs. GG)  | 56.7                    | 73.8                    | 0.716             |
| SLC2A1 rs841858 (TT vs. GT+GG)  | NA                      | NA                      | 0.224             |
| SLC2A1 rs3754219 (CC+CA vs. AA) | 56.7                    | 73.8                    | 0.552             |
| SLC2A1 rs3754219 (CC vs. CA+AA) | 57.7                    | 36.6                    | 0.307             |
| SLC2A1 rs841853 (AA+CA vs. CC)  | 56.3                    | 108.6                   | 0.104             |
| SLC2A1 rs841853 (AA vs. CA+CC)  | NA                      | NA                      | 0.135             |
| SLC2A1 rs841847 (TT+TC vs. CC)  | 56.7                    | 108.6                   | 0.730             |
| SLC2A1 rs841847 (TT vs. TC+CC)  | 57.7                    | NA                      | 0.536             |
| SLC2A1 rs7512565 (TT+CT vs. CC) | 108.6                   | 54.8                    | 0.644             |
| SLC2A1 rs7512565 (TT vs. CT+CC) | 63.1                    | 27.4                    | 0.124             |
| SLC2A1 rs2297977 (TT+GT vs. GG) | 56.3                    | 73.8                    | 0.661             |
| SLC2A1 rs2297977 (TT vs. GT+GG) | 57.7                    | NA                      | 0.347             |
| STAT1 rs3771300 (GG+GT vs. TT)  | 108.6                   | 56.7                    | 0.257             |
| STAT1 rs3771300 (GG vs. GT+TT)  | 57.7                    | NA                      | 0.715             |
| STAT1 rs1914408 (TT+CT vs. CC)  | 56.7                    | 63.1                    | 0.877             |
| STAT1 rs1914408 (TT vs. CT+CC)  | 57.7                    | NA                      | 0.250             |
| STAT1 rs2066804 (AA+AG vs. GG)  | 56.3                    | 63.1                    | 0.913             |
| STAT1 rs2066804 (AA vs. AG+GG)  | 57.7                    | NA                      | 0.461             |
| STAT1 rs1547550 (CC+CG vs. GG)  | 56.7                    | 73.8                    | 0.391             |
| STAT1 rs1547550 (CC vs. CG+GG)  | NA                      | NA                      | 0.287             |

Non-capsule group

| SNP (genotype)                  | median OS 1<br>(months) | median OS 2<br>(months) | <i>P</i><br>value |
|---------------------------------|-------------------------|-------------------------|-------------------|
| SLC2A1 rs841858 (TT+GT vs. GG)  | 74.4                    | 75.5                    | 0.995             |
| SLC2A1 rs841858 (TT vs. GT+GG)  | NA                      | NA                      | 0.536             |
| SLC2A1 rs3754219 (CC+CA vs. AA) | 55.8                    | 96.8                    | 0.072             |
| SLC2A1 rs3754219 (CC vs. CA+AA) | 75.5                    | 41.7                    | 0.857             |
| SLC2A1 rs841853 (AA+CA vs. CC)  | 96.8                    | 73.7                    | 0.238             |
| SLC2A1 rs841853 (AA vs. CA+CC)  | NA                      | NA                      | 0.638             |
| SLC2A1 rs841847 (TT+TC vs. CC)  | 81.9                    | 75.5                    | 0.944             |
| SLC2A1 rs841847 (TT vs. TC+CC)  | 75.5                    | 28.8                    | 0.827             |
| SLC2A1 rs7512565 (TT+CT vs. CC) | 74.4                    | 96.8                    | 0.794             |
| SLC2A1 rs7512565 (TT vs. CT+CC) | 75.5                    | 19.6                    | 0.347             |
| SLC2A1 rs2297977 (TT+GT vs. GG) | 74.4                    | 75.5                    | 0.457             |
| SLC2A1 rs2297977 (TT vs. GT+GG) | 75.5                    | NA                      | 0.425             |
| STAT1 rs3771300 (GG+GT vs. TT)  | 74.4                    | 75.5                    | 0.385             |
| STAT1 rs3771300 (GG vs. GT+TT)  | 81.9                    | 55.8                    | 0.359             |
| STAT1 rs1914408 (TT+CT vs. CC)  | 75.5                    | 81.9                    | 0.497             |
| STAT1 rs1914408 (TT vs. CT+CC)  | 75.5                    | 81.9                    | 0.616             |
| STAT1 rs2066804 (AA+AG vs. GG)  | 75.5                    | 81.9                    | 0.210             |
| STAT1 rs2066804 (AA vs. AG+GG)  | 81.9                    | 74.4                    | 0.894             |
| STAT1 rs1547550 (CC+CG vs. GG)  | 74.4                    | NA                      | 0.504             |
| STAT1 rs1547550 (CC vs. CG+GG)  | NA                      | NA                      | NA                |

|                                  |       |       |       |                                  |      |      |       |
|----------------------------------|-------|-------|-------|----------------------------------|------|------|-------|
| STAT1 rs2280232 (CC+CA vs. AA)   | 56.3  | 108.6 | 0.260 | STAT1 rs2280232 (CC+CA vs. AA)   | 81.9 | 74.4 | 0.727 |
| STAT1 rs2280232 (CC vs. CA+AA)   | 57.7  | NA    | NA    | STAT1 rs2280232 (CC vs. CA+AA)   | 75.5 | NA   | 0.673 |
| STAT1 rs34997637 (GG+GA vs. AA)  | 73.8  | 56.7  | 0.175 | STAT1 rs34997637 (GG+GA vs. AA)  | NA   | 73.7 | 0.140 |
| STAT1 rs34997637 (GG vs. GA+AA)  | 63.1  | 56.7  | 0.604 | STAT1 rs34997637 (GG vs. GA+AA)  | 81.9 | 73.7 | 0.602 |
| STAT1 rs12693591 (AA+CA vs. CC)  | 108.6 | 44.7  | 0.001 | STAT1 rs12693591 (AA+CA vs. CC)  | 81.9 | 73.7 | 0.620 |
| STAT1 rs12693591 (AA vs. CA+CC)  | 63.1  | 25.1  | 0.069 | STAT1 rs12693591 (AA vs. CA+CC)  | 74.4 | 75.5 | 0.499 |
| STAT1 rs10173099 (CC+TC vs. TT)  | 73.8  | 56.7  | 0.480 | STAT1 rs10173099 (CC+TC vs. TT)  | 81.9 | 74.4 | 0.618 |
| STAT1 rs10173099 (CC vs. TC+TT)  | 56.3  | NA    | 0.306 | STAT1 rs10173099 (CC vs. TC+TT)  | 81.9 | 45.6 | 0.128 |
| STAT1 rs2066802 (GG+AG vs. AA)   | 108.6 | 56.3  | 0.013 | STAT1 rs2066802 (GG+AG vs. AA)   | 81.9 | 75.5 | 0.340 |
| STAT1 rs2066802 (GG vs. AG+AA)   | 63.1  | 27.4  | 0.240 | STAT1 rs2066802 (GG vs. AG+AA)   | 75.5 | NA   | 0.936 |
| STAT1 rs10208033 (TT+TC vs. CC)  | 108.6 | 56.3  | 0.266 | STAT1 rs10208033 (TT+TC vs. CC)  | 81.9 | 73.7 | 0.708 |
| STAT1 rs10208033 (TT vs. TC+CC)  | 63.1  | 44.7  | 0.756 | STAT1 rs10208033 (TT vs. TC+CC)  | 81.9 | 75.5 | 0.891 |
| STAT1 rs1467199 (GG+GC vs. CC)   | 56.7  | 63.1  | 0.626 | STAT1 rs1467199 (GG+GC vs. CC)   | 73.7 | 81.9 | 0.991 |
| STAT1 rs1467199 (GG vs. GC+CC)   | 56.7  | 73.8  | 0.718 | STAT1 rs1467199 (GG vs. GC+CC)   | 74.4 | 81.9 | 0.737 |
| CTNNB1 rs3864004 (AA+GA vs. GG)  | 57.7  | 73.8  | 0.642 | CTNNB1 rs3864004 (AA+GA vs. GG)  | 75.5 | 81.9 | 0.558 |
| CTNNB1 rs3864004 (AA vs. GA+GG)  | 57.7  | NA    | 0.171 | CTNNB1 rs3864004 (AA vs. GA+GG)  | 75.5 | NA   | 0.637 |
| CTNNB1 rs75288535 (GG+GA vs. AA) | 57.7  | NA    | 0.617 | CTNNB1 rs75288535 (GG+GA vs. AA) | 96.8 | 50.3 | 0.055 |
| CTNNB1 rs75288535 (GG vs. GA+AA) | 63.1  | 44.7  | 0.103 | CTNNB1 rs75288535 (GG vs. GA+AA) | 81.9 | 22.0 | 0.247 |
| CTNNB1 rs1798802 (AA+GA vs. GG)  | 57.7  | 73.8  | 0.732 | CTNNB1 rs1798802 (AA+GA vs. GG)  | 74.4 | 81.9 | 0.684 |
| CTNNB1 rs1798802 (AA vs. GA+GG)  | 57.7  | NA    | 0.224 | CTNNB1 rs1798802 (AA vs. GA+GG)  | 75.5 | 29.6 | 0.172 |
| CTNNB1 rs11564465 (TT+TC vs. CC) | 57.7  | 108.6 | 0.527 | CTNNB1 rs11564465 (TT+TC vs. CC) | 75.5 | NA   | 0.994 |
| CTNNB1 rs11564465 (TT vs. TC+CC) | 63.1  | NA    | 0.537 | CTNNB1 rs11564465 (TT vs. TC+CC) | 75.5 | 19.7 | 0.734 |

|                                   |       |       |       |
|-----------------------------------|-------|-------|-------|
| CTNNB1 rs4135385 (AA+AG vs. GG)   | 56.3  | 108.6 | 0.128 |
| CTNNB1 rs4135385 (AA vs. AG+GG)   | 57.7  | NA    | 0.945 |
| CTNNB1 rs2293303 (TT+CT vs. CC)   | 63.1  | 45.8  | 0.506 |
| CTNNB1 rs2293303 (TT vs. CT+CC)   | 63.1  | NA    | 0.783 |
| SERPINE1 rs2227631 (AA+GA vs. GG) | 56.7  | 108.6 | 0.496 |
| SERPINE1 rs2227631 (AA vs. GA+GG) | 57.7  | 108.6 | 0.494 |
| SERPINE1 rs6092 (AA+GA vs. GG)    | 73.8  | 56.7  | 0.171 |
| SERPINE1 rs6092 (AA vs. GA+GG)    | 63.1  | 37.4  | 0.176 |
| SERPINE1 rs6090 (AG vs. GG)       | 57.7  | NA    | 0.284 |
| SERPINE1 rs2227667 (GG+GA vs. AA) | 108.6 | 63.1  | 0.537 |
| SERPINE1 rs2227667 (GG vs. GA+AA) | 73.8  | 50.8  | 0.077 |
| SERPINE1 rs2227692 (TT+TC vs. CC) | 108.6 | 56.7  | 0.263 |
| SERPINE1 rs2227692 (TT vs. TC+CC) | 73.8  | 37.5  | 0.171 |
| SERPINE1 rs7242 (GG+GT vs. TT)    | 63.1  | 57.7  | 0.876 |
| SERPINE1 rs7242 (GG vs. GT+TT)    | 63.1  | 56.3  | 0.547 |
| DKK1 rs11001553 (CT vs. CC)       | 63.1  | 50.8  | 0.446 |
| DKK1 rs2241529 (GG+GA vs. AA)     | 56.7  | 108.6 | 0.447 |
| DKK1 rs2241529 (GG vs. GA+AA)     | 63.1  | 37.5  | 0.224 |
| DKK1 rs1569198 (GG+GA vs. AA)     | 56.7  | 108.6 | 0.710 |
| DKK1 rs1569198 (GG vs. GA+AA)     | 63.1  | 27.7  | 0.198 |
| IFNG rs1861494 (CC+TC vs. TT)     | 73.8  | 56.7  | 0.157 |
| IFNG rs1861494 (CC vs. TC+TT)     | 63.1  | 56.7  | 0.573 |
| IFNG rs2430561 (AA+TA vs. TT)     | 56.7  | 63.1  | 0.403 |

|                                   |      |       |       |
|-----------------------------------|------|-------|-------|
| CTNNB1 rs4135385 (AA+AG vs. GG)   | 74.4 | 75.5  | 0.663 |
| CTNNB1 rs4135385 (AA vs. AG+GG)   | 96.8 | 50.3  | 0.012 |
| CTNNB1 rs2293303 (TT+CT vs. CC)   | 75.5 | NA    | 0.708 |
| CTNNB1 rs2293303 (TT vs. CT+CC)   | 75.5 | NA    | NA    |
| SERPINE1 rs2227631 (AA+GA vs. GG) | 50.3 | 96.8  | 0.019 |
| SERPINE1 rs2227631 (AA vs. GA+GG) | 74.4 | NA    | 0.075 |
| SERPINE1 rs6092 (AA+GA vs. GG)    | 75.5 | 50.3  | 0.283 |
| SERPINE1 rs6092 (AA vs. GA+GG)    | 75.5 | 28.6  | 0.222 |
| SERPINE1 rs6090 (AG vs. GG)       | 74.4 | 75.5  | 0.469 |
| SERPINE1 rs2227667 (GG+GA vs. AA) | NA   | 74.4  | 0.173 |
| SERPINE1 rs2227667 (GG vs. GA+AA) | 75.5 | 31.0  | 0.528 |
| SERPINE1 rs2227692 (TT+TC vs. CC) | 74.4 | 75.5  | 0.847 |
| SERPINE1 rs2227692 (TT vs. TC+CC) | 75.5 | 20.2  | 0.126 |
| SERPINE1 rs7242 (GG+GT vs. TT)    | 75.5 | 74.4  | 0.853 |
| SERPINE1 rs7242 (GG vs. GT+TT)    | 75.5 | NA    | 0.240 |
| DKK1 rs11001553 (CT vs. CC)       | 73.7 | 101.3 | 0.244 |
| DKK1 rs2241529 (GG+GA vs. AA)     | 73.7 | 96.8  | 0.289 |
| DKK1 rs2241529 (GG vs. GA+AA)     | 74.4 | 101.3 | 0.450 |
| DKK1 rs1569198 (GG+GA vs. AA)     | 74.4 | 96.8  | 0.540 |
| DKK1 rs1569198 (GG vs. GA+AA)     | 75.5 | NA    | 0.475 |
| IFNG rs1861494 (CC+TC vs. TT)     | 75.5 | 74.4  | 0.725 |
| IFNG rs1861494 (CC vs. TC+TT)     | 96.8 | 45.6  | 0.022 |
| IFNG rs2430561 (AA+TA vs. TT)     | 75.5 | 74.4  | 0.571 |

|                                 |      |       |       |
|---------------------------------|------|-------|-------|
| IFNG rs2430561 (AA vs. TA+TT)   | NA   | NA    | NA    |
| IFNG rs2069705 (AA+AG vs. GG)   | 56.7 | 63.1  | 0.665 |
| IFNG rs2069705 (AA vs. AG+GG)   | NA   | NA    | 0.322 |
| HIF1A rs2301104 (GC vs. GG)     | 63.1 | 43.5  | 0.181 |
| HIF1A rs72714570 (GG+GC vs. CC) | 63.1 | 56.7  | 0.955 |
| HIF1A rs72714570 (GG vs. GC+CC) | NA   | NA    | 0.496 |
| HIF1A rs2301113 (CC+CA vs. AA)  | 56.3 | 73.8  | 0.155 |
| HIF1A rs2301113 (CC vs. CA+AA)  | 57.7 | NA    | 0.553 |
| HIF1A rs11549465 (TC vs. CC)    | 57.7 | 56.7  | 0.095 |
| HIF1A rs2057482 (TT+CT vs. CC)  | 45.8 | 108.6 | 0.004 |
| HIF1A rs2057482 (TT vs. CT+CC)  | NA   | NA    | 0.207 |

|                                 |      |      |       |
|---------------------------------|------|------|-------|
| IFNG rs2430561 (AA vs. TA+TT)   | NA   | NA   | 0.536 |
| IFNG rs2069705 (AA+AG vs. GG)   | 73.7 | 81.9 | 0.691 |
| IFNG rs2069705 (AA vs. AG+GG)   | NA   | NA   | 0.536 |
| HIF1A rs2301104 (GC vs. GG)     | 75.5 | 22.3 | 0.062 |
| HIF1A rs72714570 (GG+GC vs. CC) | 81.9 | 45.6 | 0.138 |
| HIF1A rs72714570 (GG vs. GC+CC) | NA   | NA   | 0.921 |
| HIF1A rs2301113 (CC+CA vs. AA)  | 73.7 | 81.9 | 0.910 |
| HIF1A rs2301113 (CC vs. CA+AA)  | 75.5 | 41.7 | 0.452 |
| HIF1A rs11549465 (TC vs. CC)    | 74.4 | 81.9 | 0.944 |
| HIF1A rs2057482 (TT+CT vs. CC)  | 75.5 | 41.7 | 0.117 |
| HIF1A rs2057482 (TT vs. CT+CC)  | NA   | NA   | 0.115 |

**Supplementary Figure 1** Haplotype block structure and linkage disequilibrium (LD) Analysis

of CTNNB1.

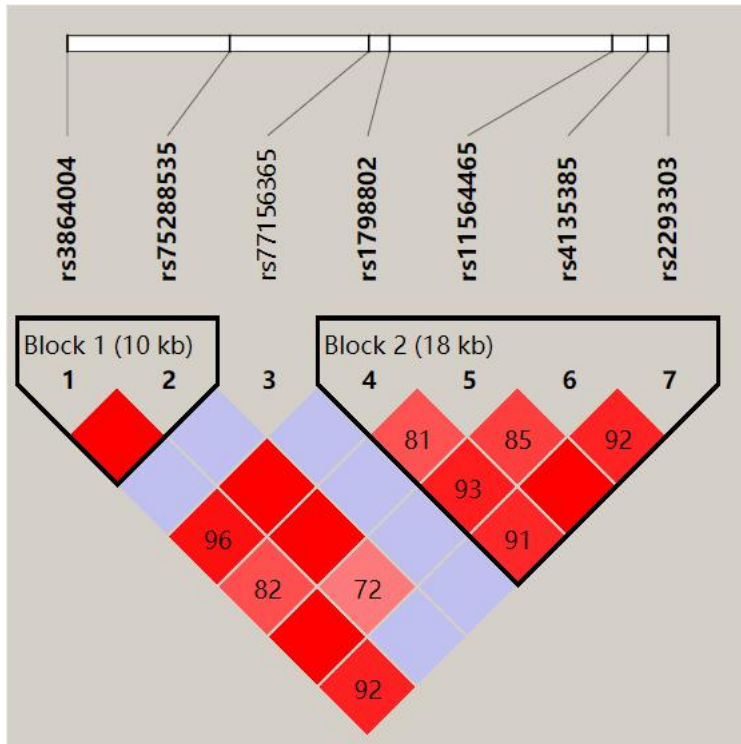

**Supplementary Figure 2** Haplotype block structure and linkage disequilibrium (LD) Analysis

of DKK1.

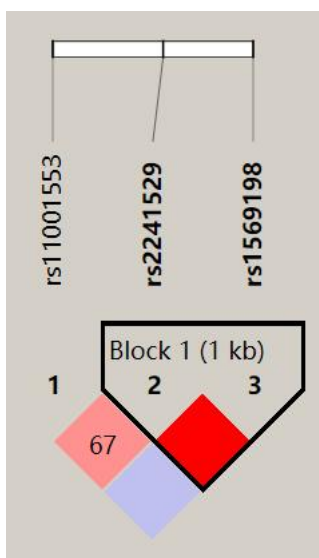

**Supplementary Figure 3** Haplotype block structure and linkage disequilibrium (LD) Analysis

of HIF1A.

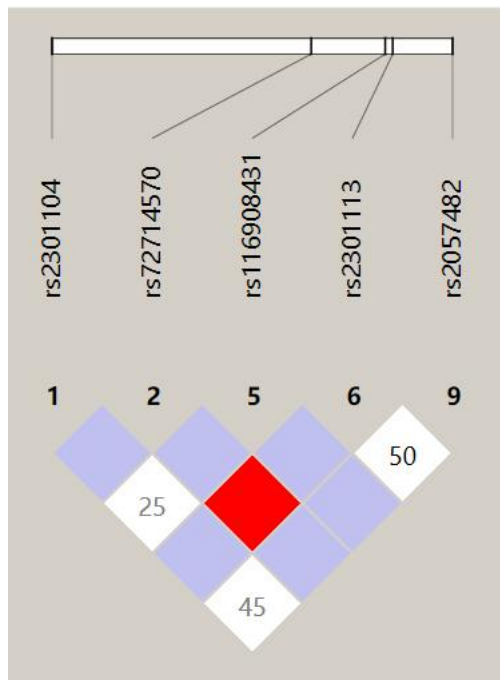

**Supplementary Figure 4** Haplotype block structure and linkage disequilibrium (LD) Analysis

of IFNG.

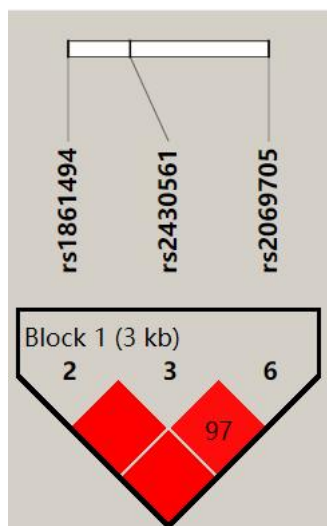

**Supplementary Figure 5** Haplotype block structure and linkage disequilibrium (LD) Analysis

of SERPINE1.

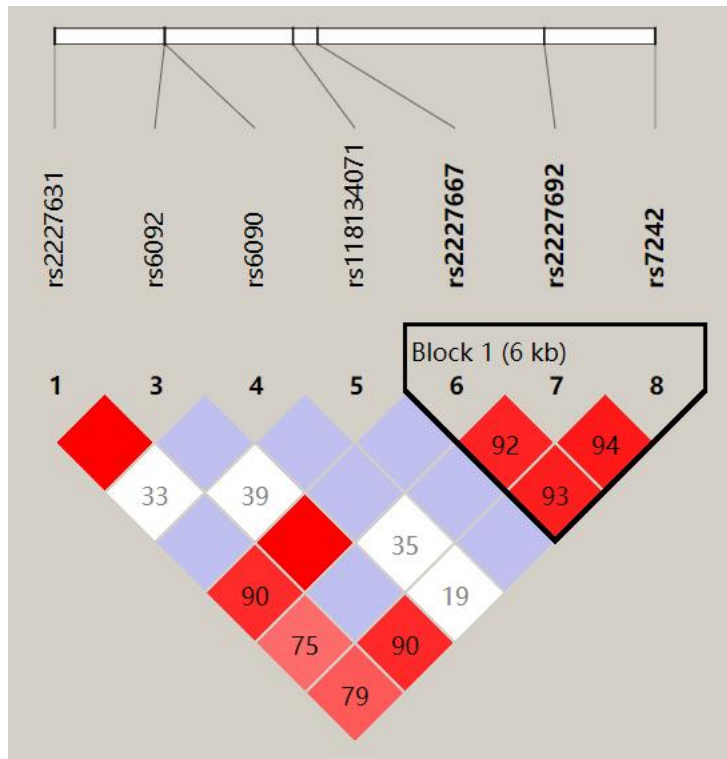

Supplement: Supplementary file 1 [file get_supplementary_file.php]
